# Supplementary material for: Diversification and collapse of a telomere elongation mechanism
Source: HighWire-hosted journal article supplement (doi:10.1101/gr.245001.118), 2019-05-28
Supplement: Supplemental_Table_S1.xlsx [file Supplemental_Table_S1.xlsx]

## Sheet: Sheet1
Table S1. List of jockey family retrotransposon domain sequences and corresponding sources used as the query for step one of our custom pipeline (Fig. S2).
TE_reference_name	species	protein domain	source	source reference	sequence
TART-1_DWi_1p	D. willistoni	ORF2	repbase	Repbase Reports 12(9), 1980-1980 (2012)	NILNKEISLSKNKHLNKKLCKIDSSDRYRPHKLWQLTNKLKRQPLPNWPLRIPSGVDKKHAWTRSPEGKMELFTDQLEKRFSPNLTNSSLDRAKINEETNAILAQKMLMEYACKTHHSIASSSANFDSSNSPFVKPITLSELKKEIDSLINKKAPGYDRINNALIKVLPLKAIIFLLKIYNSILRFGHFPLVWKKAIVVMVKKPKKPISEASSYRPISLLPAFSKILESLLAKRLLKCNRLSQSIPNHQFGFRKFHGAEHQLARVTQFLQRAFEDKLYGSXIFIDITEAFDKVWHCGLRNKLIKLLPINLYKVLDSYLKDRTFSVRGNHGIMSRDGKILAGIPQGSVLGPLLYNIYSSDMPIPKFIIEHETLIEYYPTYKHGDTLLSTYADDTIFISTD…
TART_B1_1p	D. melanogaster	ORF2	repbase	Repbase Reports 12(9), 1980-1980 (2012)	MTRADNRDILKIAFWNAGGINNKIDELKLFILNIDAHIIIVTETRLDNNSTKLELPGYFTYLAQNPVSSKRGGVATIVNSSIRHMALKPIEKECIQSAPIVLLPENNRRSEMIVIASVYCPPSLRWLPHHFTDVLNFAEKTLGGQTKFILCGDWNAKHRQWGCTRACQRGTALYEAVQADSTAEIIATGCATHFPHDTRKNPSAIDFSICKGLGRFEKRISSGADLSSDHLPILLEINLDTNTLFLQKQNNNILKKNTNIELFKKVLERKILLNTEIRVAEDINDAISTFMKNIKDSAAESTPSPRIRDNPRRRHRQANRNSHTLALDENTSRLLEEKRILSRVFKATKNYEDKAKLKAAENRLKKAIKILRENRINEQVEGIDTSNPDRMRKMWKLLD…
TART_DV_1p	D. virilis	ORF1	repbase	Proc. Natl. Acad. Sci. USA 100(6), 3363-3368 (2003)	MTGLQTHSTIDLESDHLPIHIGLRVGRFPYKQTTMRLLPINANVKKFQNHLDKNVRLNTEIISGPDIEDAIDILNKNIYNASLAATHPPRRHQQQQRQGTNTNRMNHGRFKLTNETIRLLAIKRQRKREHMVMRTPLTRSRLSQAQNKLKKALRMDKKKQTNKMFEQIDATDRYKIQKLWRITNNIKRQPEPNWPLKIQATDNNNSRSNRTQWTKTSKEKAEVFAAYLEQRFSPIFSNTAEYRLQVNNEINTRQQTNDCDSGAGVAGVIPFRPITYTEVTKEIGCLTIKKAAGIDNIDNRVIKALPKKAILYLVMIYNCILRHGHFPRQWKCAAIKTILKPGKPTEDVASYRPISLLAGFSKIFERLLMYRLYECSEFAKAVPLHQFGFRKDHGTEQQL…
TART_DV_3p	D. virilis	ORF3	repbase	Proc. Natl. Acad. Sci. USA 100(6), 3363-3368 (2003)	VKSMMADTPLTLLVTPQLLQQHICPTLTVHCLTGEGQTLFQMTNHSSDQYGNSFKIAYWNAAGVRNKLNELEVFMNRHKIDIMMLVELRLGPSALNPGPPITINGYHTYAATRPPPHHRCGGVATLVKHGIKHIALEAIVFESMQSAPVAVTLAKNETIVLAPIYCPPQYNWSADMFAKLFQHFEKLSGSGFILCGDWNAKHSWWGNQRACRRGVELLRSIHSNKKLNILATGGATHFPYTSRNRPSAIDIAVYRALTMTGLQTHSTIDLESDHLPIHIGLRVGRFPYKQTTMRLLPINANVKKFQNHLDKNVRLNTEIISGPDIEDAIDILNKNIYNASLAATHPPRRHQQQQRQGTNTNRMNHGRFKLTNETIRLLAIKRQRKREHMVMRTPLTRSR…
TART_A_1p	D. melanogaster	ORF1	repbase	Cell 75, 1083-1093 (1994)	MDGQNVNQSGGWASVLSISSDDGNCSSSPPSAIVSSLDTTPTSNETTIVRRSLYQTNADMKSYDFENIVLNENKNTILPDPLFVDKCGSTANTTEANEKQPADSPFPISISKNFSTSSPLTHVDTPTQEDDASAFNTLKAAKTARIIFPTHTQIEPAKPSPPSKELSSNSAPKTLSYTDKITATQKNFPTKTHVDTPTQDDDTNATKASKTAQIDSSHSQLHETKPTQPAKNPSPLTQKLTTNKTAKTHTHTDKPTASQNLFPTKTHINSPTQYNDTNASTASKDGKINLSSHSHLRETKPTQPAKNPSPLSQKQITSIAANTLTHTNKHTASQNFIPAKTHINIPTQYNDTNATKALKTAKPASPSHTYSRQTKPIKPAINALHPAQDTNPSPAISAV…
TART-C	D. melanogaster	ORF1	flybase: transposon sequence set v9.42	Fly 2, 101-110 (2008)	MDGHNGDINEGWATVLSISSDDSNQLSSPPSIIVSSLDTTPTSNETTIVRRSLHNPKADMKSYRFENIVLNENKNTILPDPLFVDKCGNTANTTEANEKKPANSPFPISIIKNLSTSSPLTHVDTPTQEDDASAFNTLKAAKTARIIFPTHTQIKPAKPSPPSKELSTNSAPKTLSYTDKITVTQKNLPDKTHVDRPTQDDDINATKASKTAKIISTQLHLRETKPTQPAKDPSPRTQKPIANKAAETLTHTDKLIASQNLVPAKTHINSPTQYNDTNATNALKTAKINFSSHSHQSEIKPTQSAKNISPLTQKQFTSESAGTHTHTDKHKNTASQNLFSAKTHINSPTQHNDTSAATASKTAKLILSPHSHLSETKPTQPALSPSPLSQKQITSIAAK…
TART-B	D. melanogaster	ORF1	flybase: transposon sequence set v9.42	Fly 2, 101-110 (2008)	MDGHNGDQSEGWATVLSISSDDSNSLSSPPSIIVSSLDTTPTSHETTIVRRSLYQTNADMKSYDFENIVLNENKNTILPDPLFVDKCGSTANTTEANEKKPANSPFPISISKNFSTSSPLTHVDTPTQEDDASAFNTLKAAKTARIIFPTHTHIKPTKPSPPSKELSTNSALKTLSYTDKITGTQKNLPDKTHVDTPTQDDDINATKASKTAKIISTQTHLGETKPIQPAKDPSPRTQKPIAHKADETLTHTDKLTASQNLVPAKTHINTPTQYNDTNATNALKTAKINFSSHSHQSEIKPTQSAKNISPLTQKQFTSESAGTHTHTDKHKNTASQNLFSAKTHINSPTQHNYTSAATASKTAKLILSPHSHLSETKPTQPALSPSPLSQKQITSIAAK…
Dmel\TARTA	D. melanogaster	Gag	GenBank	Genome Res. 17: 1909-1918 (2007)	SFTTKSELGNRIQAKTMDAYKAIQNVLLGANIPLHSHQPKSAKGFQIVIRHLHQSTPTKWIESQLQDIGIATKFIRAMQFRDTRNPMRIHEVEVVPKADGSHLKVLLLKSLGGQTVKVERKRVSKDPTQCHRCQCFGHTKNYCRNPFKCMKCGQLHATVSCTKPKNLATCANCNGSHVSSYKGCPAFQEAKQRLSINKTQLLNRIEGMEKKLNNLLEIVTRL
Dmel\TARTB	D. melanogaster	Gag	GenBank	Genome Res. 17: 1909-1918 (2007)	SFTTKSELGNRIQAKTMDAHNAIQNVLLEANIPLHSHQPKSAKGFQIVIRHLHQSTPTKWIESQLQDIGIATKFIRAMQFRDTRNPMRIHEVEVVPKADGSHLKVLLLKSLGGQTVKVERKRVSKDPTQCHRCQCFGHTKNYCRNPFKCMKCGQLHATVSCTKPKNLATCANCNGSHVSSYKGCPAFQEAKQRLSINKIQLLNRIEGMEKKINNLLEIVTRL
Dmel\TARTC	D. melanogaster	Gag	GenBank	Genome Res. 17: 1909-1918 (2007)	SFTTKSELGNRIQAKTMDAYNAIQNVLLEANIPLHSHQPKSAKGFQIVIRHLHQSTPTKWIESQLQDIGIATKFIRAMQFRDTRNPMRIHEVEVVPKADGSHLKVLLIKSLGGQTVKVERKRVSKDPTQCHRCQCFGHTKNYCRNPFKCMKCGQLHASVSCTKPKNLATCANCNGSHVSSYKGCPVFQEAKQRLSINKIQLLNRIEGMEKKLNNLLEIVTRL
Dyak\TART2	D. yakuba	Gag	GenBank	Genome Res. 17: 1909-1918 (2007)	SFTTKSELGNRIQAKTMDAYNAIQNVLLEANIPLHSHQPKNAKGFQIVIRHLHQSTPTKWIESQLQDIGIATKFIRAMQFRDTRNPMRIHEVEVVPKADGSHLKVLLIKSLGGQTVKVERKRVSKDPTQCHRCQCFGHTKNYCRNPFKCMKCGQLHATVSCTKPKNLATCANCNGSHVSSYKGCPVFQEAKQRLSINKIQLLNRIEGMEKKLNNLLEIVTRL
Dsim\TART	D. simulans	Gag	GenBank	Genome Res. 17: 1909-1918 (2007)	SFTTKSELGNRIQAKTMDAYNAIQNVLLEANIPLHSHQPKSAKGFQIVIRHLHQSTPTKWIESQLQDIGIATKFIRAMQFRDTRNPMRIHEVEVVPKADGSHLKVLLLTSLGGQTVKVERKRVSKDPTQCHRCQCFGHTRNYCRNPFKCMKCGQLHATVSCTKPKNLATCANCNGSHVSSYKGCPAFQEAKQRLSINKIQLLNRIEGMEKKLNNLLEIVTSL
HeT-A	D. melanogaster	ORF1	flybase: transposon sequence set v9.42	Chromosoma 103 (3), 215-224 (1994)	MSMSDNLFSDDEVLSISSSPEQRSSPFYLNISPMSHGSDNSQINTVIINSKKLPSNQADISLKNSSGAAIKIVNSLSHKKKENTNVNNAQKDPLSLTNTTASTCGAKSSISEGKLSSPPSTSHTYEGKLLTKLTHTHTDFRGAKTSDAMGSFPSLSHSDNSIEKNLSSSTKIGPNASSPPSHAHTHTSKSTDISLESRSKHPALANTDARSIKANANDNGEIFSSLIQIDERKQEERPCTTINAFWSIFKPKPDVTKLSLKRKPTNPTKNTGKKCISPHKKSAYLCPSAQDDLNLNLNPKSSAKPTVVNLPAARILSRPAAKRDLFKSSSSRSPDEQPMSFSEVVAGTGSIFAAPCVPAPLTKTPGKRTNDDLDCSNFKTPNKKLCATSNFVTPSIFPP…
Dmel\HeTA	D. melanogaster	Gag	GenBank	Genome Res. 17: 1909-1918 (2007)	SYTTRAIEGNRIQAKDMTAYNKIKEVLVANGLPLFTNQPKSERGFRVIIRHLHHSTPCSWIVEELLKLGFQARFVRNMTNPATGGPMRMFEVEIVMAKDGSHDKILSLKQIGGQRVDIERKNRTREPVQCYRCQGFRHAKNSCMRPPRCMKCAGEHLSSCCTKPRTTATCVNCSGQHISAYKGCPAYKAEKQKLAANNVDLANRVDNLEKKIDILMALIIQG
Dsec\HeTA	D. sechellia	Gag	GenBank	Genome Res. 17: 1909-1918 (2007)	SYTTRATEGNRIQAKDMIAYHKIKDVLIANGFPLFTNQPKSERGFRVVIRHLHHSTPCSWIVKELLTLGFSARFVRNMTNPATGGPMRMFEVEIVTAKDGSHDKIISLKQIGGQRVDIERKNRTREPVQCYRCQGYRHAKNSCMRPPKCMKCAGDHLSSCCTKPRTTATCVNCSGEHISAYKGCPVYKAEKQKLAANNIDLANRVDNLEKKIDILLALITQG
Dmel\TAHRE	D. melanogaster	Gag	GenBank	Genome Res. 17: 1909-1918 (2007)	SYSTRATEGNRIQAKDMTAYNKIKEVLTANGFPLFTNQPKSERGFRVIIRHLHHSTPCSWIVEELLKLGFQARFARNMTNPATGGPMRMFEVEIVMAKDSSHGKIISLKQLGGQRVDIERKNRTREPVQCYRCQGFRHSKNSCMRPPRCMKCAGGHLSSCCTKPRTTATCVNCSGEHISAYKGCPAYKTEKRKLAVNNIDLTQRVENIEKKIDNLMELLFKC
Dsec\TAHRE	D. melanogaster	Gag	GenBank	Genome Res. 17: 1909-1918 (2007)	SYTTRAIEGNRIQAKDMTAYQKIKDVLTANGFPLSTNQPKSERGFRVVIRHLHHSTPCSWIVQELLKLGFSARFVSNMTNPATGGPMRMFEVEIVMAQDGSHDKIISLKQIGGQRVDIERKNRTREPVQCYRCQGYRHAKNSCMRPPRCMKCAGDHLSSYCTKPKYTATCANCSGEHISAYKGCPAYKAEKRKLAVNNINLTLRVENIEKKIDSLMELLFKC
TAHRE_1p	D. melanogaster	ORF1	flybase: transposon sequence set v9.42	Mol Biol Evol. 1(9):1620-4 (2004)	MSTSDHLFSDDEVHSISSSPEQRNSPFHLEISPMSHESDNSQSNISIINLRKLPLKPTNNISKCSSGTAINIFHSLSHKEKENMNTNIAQKDPLSIDNTAADTDGAKSSILKGKLPSPPLSSHTYKGKLPPATTHTNISALTHTDASQREKIPTSVICTNAAAATNTNADLGAKTSDALGNFPSLSHSDHSMENNLSSSTKIGPNTNSPSSHILTNTSQATNISAESRSKFPAPTNTDARLKKAITSDKGEIHTQIQTNKSKEHNQENKPFNYLSCYASWSTSNPKPDISKLSLTRKSTNRTGNSGKRSISPHQKNASLCPSAQGNLNSNLNSNSNPKSSATPTEVNLSAARTLSRPAAKRDLFNSSSRSPEEQPMSFSEVVAGTGPDIIAPSAPAPLT…
HETA_Dsim	D. simulans	ORF1	repbase	Repbase Reports 12(8), 1646-1646 (2012)	MSSSDHLFSEDEVLSITSSERSSPIHVNISPMSHGSGNSLVNTVNINQKKLPANQKKSPINSSWVAFNFFNSLSLNMKENINAKNAQRDPLSITNTAAANVGAKSSISKGKSPSSPPLSSQIHKRNSLPTMTHTNTAALTNTDATQREFKSTTATCTNAAAATNTDTELRGAKPSDAMGNFPSLPHTDSAEKNLSSSTKIGRNASSPPSYTHTQINKAAETNLESCSKSPALANSKTQPNKANDIDSGEIAPPLIQINESKQEERPSTTAKAFWSIFNPKPDTSKLSLSKKPTIRSVNTGKRSISPHQRSASLRPXAQGDLKLKSNNRSMPTVXNLTTARTLSRPAAKRDLFKSPSRSPDEQPMSFSEVVAGTGPIFVAPTVPAPLTKTPAKRTNDDLD…
Dere\HeTA	D. erecta	Gag	GenBank	Genome Res. 17: 1909-1918 (2007)	SFTTKSTTGNRIQAKDMEAHNKIKDILTLSGIPSHTNQAKSERGFRVVIRHLHHSTPCQWIVGELQKLGFQTIFAKNMLNPATGGPMKIFEAEISFTIDGSHKKILTLRQLGGQKIEVERKNRTREPVQCFNCQGFRHARNSCMKPPRCMKCAGHHLSNQCTKPRSTASCANCSGEHISAYKGCPTYKAEKRKLAVNNIDLTNRVENLETKINILTDILTKL
YAKHETA	D. yakuba	ORF1	flybase: transposon sequence set v9.42	Genetics 161:1113–1124 (2002)	MAQVILSDDSSNDEVLSLFSSPESQNTPFYLEISPMSQNSNNSQFNISIINMKKSSSNSAINSLKNPSEAAIKIINSLTYKGKENRENKNAQKDPLFLTNTNKETAGAKSSVSNGPVVSLLSVTHTNRGKKLTTAHNTNAAETTNTNMDDKKSGALRNFPFPTHEDNSMERNLSSSTKIGSKSISPHSLSPTHTSKVINISTNSRSKSPALANADTLHKLANIYDNSRDHNQGETQHKFITRNTFFQNLYPKPDISKLSLKNKATILAKTTKNKCISPQLKGASLCSPVQPNLNFKVTTTHSMGNTSASRTLNRPAAKRDLFNSPPNSTNALPMSFSEVVAGTGPGIVASSDPAPITKTPGKRTNTNMDMDSFSYKTPNKKACVPTNFATPNPFPPLAT…
Dyak\HeTA	D. yakuba	Gag	GenBank	Genome Res. 17: 1909-1918 (2007)	SFTTKTSIGNTIQAKDLTAHRIIKDILAKSGIPYYSNQNKSERGFRVVIRHLHPSTPCSWITSELQKLGHQTKFTRNMTNPATGGPMRMHEIEIVSAMDGSHLRILSIKQLGGQKVEIERKNRTRELVQCFRCQGFRHARNTCMKPPRCMKCAGQHWSSECTKPRSTATCSNCQGNHISAYKGCPAYKAEKQKLAVNRIDLANRVDNLEKKIDILMALIIQA
Dyak\TAHRE	D. yakuba	Gag	GenBank	Genome Res. 17: 1909-1918 (2007)	SFTTKTSIGNTIQAKDLTAHRTIKDILAKSGIPFYSNQNKTERGFRVVIRHLHPTTPCSWITSELQKLGHQTKFTRNMTNPATGGPMRMHEVEIASAMDGSHLRILSIKQLGGQKVEIERKNRTREPVQCFRCQGFRHARNTCMKPPRCMKCAGQHWSSECTKPRSTATCSNCQGNHISAYKGCPAYKAEKQKLAVNRIDLAQRVLAMEKKIDALTELLFKS
TART_DV_2p	D. virilis	ORF1	flybase: transposon sequence set v9.42	Proc. Natl. Acad. Sci. U.S.A 100(6), 3363-3368 (2003)	MQKPTVSKSPPKSPHNASEITANSAVPPHRATEECSISERAKSELSQLQQQLTKNPQKQLSREHRRQQLLRLCEEEERLMPDVPAQQPTLTLKHKPKLKTVLANSSPPSSAPLRMSLTKSSKAKARKESQSSACREKSPEENTYVNVLESDDESDIAANKNYDQPQQQTTIAQVHNFNTNTSITSTPKAASHCDPSPNVSAHEVELHNVDNTREASYVNNIDELTDVFDDEDDDDDCYRPAAVINSSVADMLNRTTTVEHNSTATANRGEILANVKTSDAFAANKINSITFEKIEPIPQTITPTVAKGPKFNCSMLPTTSLSAKKSLKRKGTLPQQSKQKRAQTLAVQGNSRPGMKIQDFLKSSTRVTKATNKAAIINKYKKSNRNTKKVNPSSSTKLN…
Dvir\TR2A	D. virilis	Gag	GenBank	Genome Res. 17: 1909-1918 (2007)	KYTTKCTQNDRVQCSDLLSYNAAIALLGATEIQMHTHQMRSERGYRVLLKNVHHSTPCEQIRAELAKHGHTVRFASVIKHRFERRPLNMFEVELAPNGDTNDKVLELKTLGNQHIEVERQLKRDEPVQCHRCQSFGHSKNYCRRPFACLKCGEQHPTTTCTKPRNTAKCVNCKADHIASFKGCSVYKMEREKLAANRVRNVISINEMSKKIDMLISLLLTM
Dana\HTR2A	D. ananassae	Gag	GenBank	Genome Res. 17: 1909-1918 (2007)	TYTTTSLSGNKLTSNNFFTYQHILEKLETDKLQTHTHQPKSERGYRIIIRQLHHSTPCEDIRRLLSDLGYAPRYINNIKHRRSRKPMDLFEAELAPAQKDYNEKILAITKLGNQRVTIERQLRRLEPPMCHRCQRYGHTKNFCRRDFVCLKCAGNHPSTACAQTKLTPKCANCGLGHVASYKGCAAFKQAQTRLTAYRAHSLTCVSEMGKKMDALMGLLQSF
Dper\TR2A	D. persimilis	Gag	GenBank	Genome Res. 17: 1909-1918 (2007)	KFTTTSVRGNKLDCGDMETYNRVMAKLDADNINMHTHQLRKERGYRIILRNLHHSTPCDWIRKLIGEMGLSVRYVNVIKHRRSRKPLNMFEVELEPTLDNGNDKILSLTTMGNQEISVERQMRRIDPVQCHRCQCFGHSKNYCRRAFVCQKCAGAHPSTACAEAKIPPKCANCGEGHVASYRGCKAFKQAQATLKSYRAHNLLLVSEMGKKMDALIDLLHTF
Dpse\TR2A	D. pseudoobscura	Gag	GenBank	Genome Res. 17: 1909-1918 (2007)	KFTTTSVRGNKLDCGDMETYNRVMAKLDADNINMHTHQLRKERGYRIILRNLHHSTPCDWIRKLIGEMGLSVRYVNVIKHRRSRKPLNMFEVELEPTLDNGNDKILSLTTMGNQEISVERQMRRIDPVQCHRCQCFGHSKNYCRRAFVCQKCAGAHPSTACAEAKIPPKCANCGEGHVASYRGCKAFKQAQATLKSYRAHNLLLVSEMGKKMDALIDLLHTF
Dgri\HTR2B	D. grimshawi	Gag	GenBank	Genome Res. 17: 1909-1918 (2007)	SFTTKCTQGNRILCDNVETYKTILKTLDDDNTQLYTHQLKSKRGYRVIIRNLHHSTSVEWLKSQLSELGYTVKYATPVKHRFTGNTLNMFEVEIAPLPEQEYKNITKLTRIGCQQVVVEEHVRRLDPVQCHRCQAFGHSKNYCRRPFVCLKCAGNHMTTVCEKQRDTAACANCKGKHVASYKGCPVYKLARSKLLVSRAEHTVLVTELGRKMDAFLTLMMSL
Dgri\TR2A	D. grimshawi	Gag	GenBank	Genome Res. 17: 1909-1918 (2007)	SFTTKCSQGDRVLCKNLDTYKAVLAALNEDETHLHTHQLRMERGYRVVIRHLHHTTSHEWVKDKLGQLGFAARYVAVIKHRFTAKPMNLFEVELEPRLDGSNEKILSLTVLGNQQVTVDRQQRRIDPVQCHRCQAFGHSKNYCRRPFLCLKCAGGHATTTCSKGKEIATCANCKGSHVASYKGCPVYKAARDKLLSSRSANTLMIGEMGKKMDTLLNILLSI
Dvir\TR2C	D. virilis	Gag	GenBank	Genome Res. 17: 1909-1918 (2007)	KFTTKCTQGDRVQCKDFSTYNAILGLLNTENIPMHTHQPRSERGYRVILKHLHSSTPCDWLRTQLGELGYVVRYVNVMKHRFSGKPLNIFEIEIEPRVDGSHTKICKLNELGNQHVAVERQHKSADPVQCHRCQAFGHSKNYCRRPFVCLKCAGEHPTTMCAKDRDTAKCANCGEGHIASYKGCAVIQTCAKFNKHKSYWNANIVEEMGKKIDNLLNVLFKF
Dmoj\HTR2A	D. mojavensis	Gag	GenBank	Genome Res. 17: 1909-1918 (2007)	SYTTKVAQDNRIQCENISTYNAISALLQDKQIHNHTYQLRKDRGYRIIIRHLHYSTPYDWIRDQLKELGYVTRHVSVIKHRTRNEPMNIFEVELEPRLDGGHEKILTLTELGHQNIAVEKQLRRIDPLQCHRCQSFGHSKNYCRRPFVCLKCAGPHATTTCAKTIDAAKCANCGGKHVASYKGCPAFKSAQNKLIALREPNRQHIQSQPSPQQVPLDSPNLP
Dgri\HTR3A	D. grimshawi	Gag	GenBank	Genome Res. 17: 1909-1918 (2007)	KFTTKCSKFNKFICEDLNTYRALLSALKNDDTDLHTHQLRSDRGYRVVIRQLHHSTPTEWINNTLRSLGFGVRNVNVIKHNRTLQPMNIFAVELQPTIDNFNDTILSLTLLGNQRVVVERQLRRQDPAQCHRCQLFGHTKNYCRRPFICMKCAGAHPSTACSATRIAPKCANCGGSHVSCYKGCPKYKEARAKLLINKLRGLNRLLLMERKVDALVNLVQAF
Dmoj\HTR3B	D. mojavensis	Gag	GenBank	Genome Res. 17: 1909-1918 (2007)	RFVTSAATSSTIHCDDMATHKAIIDVLAAENVQMHTHQSRNQRGYRVVIKKLHHSIPCDWLRAKLSELGFVVRFVRTMKHRFTGTPLNVFEVELQTMPDGSHLKICDLDMISNQMVQVERQAKPIDPAQCHRCQAFGHTKNYCRRPFRCMKCAGPHPSTECTKARDAAKCHNCGGEHVSCYKGCPKYKEARNKLLAVKHLHLARLQQQLKDEQARSSSLEKL
Dmoj\HTR3C	D. mojavensis	Gag	GenBank	Genome Res. 17: 1909-1918 (2007)	SFRRSVSQSSTIYSDDMATHRAIVDFLTAENVQMYTHQSHHQKGYRVVIKKLHHSTPCAWLRVKLSELGFVVRFIRAIVRRFTGMPLNVFEVELQPMPDGSHLKICELDTISNQQVLVERQAKAIDPAQCHRCQAFGHTKNYCRRPYRCMKCAGSHASTECTKARDAAKCFNCGGAHVCCNKGCPKYKEARNRLLAVRYLHLARLQQKLKDEQAKSSSLEEL
Dmoj\TR3A	D. mojavensis	Gag	GenBank	Genome Res. 17: 1909-1918 (2007)	RFRTKATPSNRIQCEDIESYNAARSTLEEDGTHLYTHQLPSQKGLRIVVKNIHHSTPCEWIKNILSEKGYVVRHIRCARQRFTGKPLNLFEVEIQPTADGSHLNILSLKELSNQAVRIERQAKPVDPPQCHRCQAYGHTKNYCRRPFKCMKCAGDHASTDCTKQRNTPKCTNCGGEHISSYKGCPSLKAARSKLSSVRAIYLTMFNKLENKIDQLINVMMRF
Dper\HTR3A	D. persimilis	Gag	GenBank	Genome Res. 17: 1909-1918 (2007)	KFTTKSMANSRVHCDDMTTYNAIQNALAEDSTQLHTHQPRSERGYRVIVRHLHHTTPSSWITEELERLGYTTRFIRGLKHRFNGRPLNIFEVEIQPKADGGHEAILDIKNLANQCVSIVRQAKPRDPAQCHRCQEFGHTKNYCRRPYKCMKCAGDHPTTACRKPRQEPKCANCSGKHVSCYKGCPAYKKARSHLRANRLIYAVKIENLEKKLQELTTLIASL
Dpse\HTR3A	D. pseudoobscura	Gag	GenBank	Genome Res. 17: 1909-1918 (2007)	KFTTKTMTNSRVHCGDMTTYNAIQDALAEDSTQLHTHQPRSERGYRVIVRHLHHTTPSSWISEELERLGYTARFIRGLKHRFNGRPLNIFEVEIQPKADGGHEAILEIKQLANQCVSIVRQAKPRDPAQCHRCQEFGHTKNYCRRPYKCMKCAGDHPTTACRKPRQEPKCVNCSGKHVSCYKGCPAYKKARSHLRANRLIYAVKIENLEKRLQELTTLIASL
Dper\TR3A	D. persimilis	Gag	GenBank	Genome Res. 17: 1909-1918 (2007)	KFTTKSMANSRVHCDDIITYNAIQNALAEDSTQLHTHQPRSERGYRVIVRHLHHTTPSSWISEELERLGFTARFIRGLKHRYNGRPLNIFEVEIQPKADGGHEAILDIKNLANQCVSIVRQAKPRDPAQCHRCQEFGHTKNYCRRPYKCMKCAGDHPTTACRKPRQEPKCANCSGKHVSCYKGCPAYKKARSHLRANRLINAEFLTRLEAKIDSLFSAIVKL
Dpse\TR3A	D. pseudoobscura	Gag	GenBank	Genome Res. 17: 1909-1918 (2007)	KFTTKSMTNSRVHCGDMTTYNAIQNALAEDSTQLHTHQPRCERGYRVIVRHLHHTTPSSWISEELERLGYTARFIRGLKHRFNGRPLNIFEVEIQPKADGGHEAILDVKQLANQCVSIVRQAKPRDPAQCHRCQEFGHTKNYCRRPYKCMKCAGDHPTTACRKPRQEPKCANCSGKHVSCYKGCPAYKKARSQLRANRLTNAEFLSRLEAKIDSLFSAIVKL
Dper\HTR3B	D. persimilis	Gag	GenBank	Genome Res. 17: 1909-1918 (2007)	SYHTKLISRNRIQARDMATRDAIMAILGDAMTGHYTHQHKSDRGLRIVVRDLHHSTSTQLIKNQMAELGYYVIFIRAIKGRSDGQPLDQFELEIAPKPDESHHDVLQLTQLGNQLVTVERQAKPVDPAQCHRCQAFGHTRTYCRRSFVCMKCAGAHASTACAKPRADAPKCANCQGAHISAYKGCPAFKAARGRLLSHRVAALLENTQRMTRLEKRLEAMMSL
Dper\TR3B	D. persimilis	Gag	GenBank	Genome Res. 17: 1909-1918 (2007)	SYHTKLISRNRIQARDMATRDAIMAILGDAMTGHYTHQHKSDRGLRIVVRDLHHFTSTQLIKNQMAELGYYVIFIRAIKGRSDGQPLDQFELEIAPKPDESHHDVLQLTQLGNQLVTVERQAKPVDPAQCHRCQAFGHTRTYCRRSFVCMKCAGAHASTACAKPRADAPKCANCQGAHISAYKGCPAFKAARGRLLSHRVAVILENIKRMTQLEKKIEEMTLL
Dper\TR4A	D. persimilis	Gag	GenBank	Genome Res. 17: 1909-1918 (2007)	RFTTKSTPGNRIQCADMDAHKKITTLLNDQKVPMHTHQQIGQRGVRYILRHLHYSTTREWISSELKKRHYIVRYTSNMKHRSTGQPINMFEIEIEHKQDGSHDEILKISELGGQAVAFERKWVTRDPLQCHRCQAYGHTRNYCKNAPKCMKCASDHLSTTCTKPRYTAKCVNCGGEHVSCFKGCPAFKAARSKLKIDKIVIHTLLQNPPPKNTDNINNTTNN
Dpse\TR4A	D. pseudoobscura	Gag	GenBank	Genome Res. 17: 1909-1918 (2007)	RFTTKSTPGNRIQCADMDAHKKITTLLNDQKVPMHTHQQIGQRGVRYILRHLHYSTTREWISSELKKRHYIVRYTSNMKHRSTGQPINMFEIEIEHKQDGSHDEILKISELGGQAVAFERKWVTRDPLQCHRCQAYGHTRNYCKNAPKCMKCASDHLSTTCTKPRYTAKCVNCGGEHVSCFKGCPAFKAARSKLKIDKIVIHTLLQNLPPKNTDNINNTTNN
Dmoj\HTR1C	D. mojavensis	Gag	GenBank	Genome Res. 17: 1909-1918 (2007)	NFYTKPTAGQRIQCANIAAYRKLVHYFAQERIVSHTYQLAADRGFRFCIRYLHRSTPTDWIRQQLTDLGHTVRFVSVIKKRFTRQPLDLFEVEVVAAPNSTNVLNIECLGGQRVKIERILRNADAVQCHRCQKFGHTKNYCRRPFVCVKCSGSHASTDCGRAKGDAKCANCLGEHAASYRGCIAFKEACKQKMANQQGIVNKLDRLIDMMSALTTCLSAS
Dvir\TR1B	D. virilis	Gag	GenBank	Genome Res. 17: 1909-1918 (2007)	TYATKPSAGQQVLCNDVDSYRKLVQYFQDNSIASHTYQLKHERGFKIIMRHLHRSTPADWIRTKLSDLGHKARFVSVIKKRFTREPMDMFEIELEPKANNSEILRLNMLGGQKVKVELPLRTTDIVQCHRCQQFGHTKNYCRRAFVCVKCSGKHPSTECSITANDPKCANCEGPHAASYKGCQSFKDACKQKESESVVVENKLDKLLNLLTNLTSCLMAK
Dmoj\HTR1E	D. mojavensis	Gag	GenBank	Genome Res. 17: 1909-1918 (2007)	NFTTKPAASHRVQCVDIPTYRKLNNYLKANNIESHTYQLRSERGLRVVIRHLHHSTPDTWIRDHLSKLGHSIKFLRAIKSRYTNQPLDLFELELEKSDNNDDILNLTLLGNQKVRVEKPYKTTDVAQCHRCQQFGHTKNYCRRPFVCVKCGGGHPSTSCTKNKEDAKCANCSGPHAASYKGCIAYKEARKAKISESSVFGNKLDKLTELMTTLAASMLAN
Dmoj\TR1A	D. mojavensis	Gag	GenBank	Genome Res. 17: 1909-1918 (2007)	NYSTKPAANHRVQCKDVATHRKLVRYLDANSIENYTFQLKCERGYRAVIRHLHFSTPDHYIREQLAKLGHEVRFLRGIKSRFTKEPLDLFEVELAVSANNAELLQITAIGNQRVKIERPYKTNEIAQCHRCQKFGHTKNYCRRPFACVKCGANHASTDCGKQKGDAKCANCSGPHAASYKGCPAYKEACKKRENESATLEAKIDKLIEMMTTLTACLLAQ
Dmoj\TR1B	D. mojavensis	Gag	GenBank	Genome Res. 17: 1909-1918 (2007)	NYDVKRTSNHRVQCKDIATYRNLVKYLDENKVENYTFQLKSERGFRAIIRDLHYSTPDHYIREKLANLGHQVRFLRGIKSRFTKEPLDLFEVELVPSANNAEFMQITAIGNQRVKIEKPYKSSEVAQCHRCQKFGHTKNYCRRPFACVKCGDNHASTDCGRQKGEAKCANCAGPHAASYKGCPSYKEACKKRENEGVHLEAKIDKLIEMMTTLTACLLAQ
Dmoj\HTR1D	D. mojavensis	Gag	GenBank	Genome Res. 17: 1909-1918 (2007)	SYFVKTTSGRRIQCLSIDSYRKLIHHFEDINLESHTFQIKSERGFRILIRHLHRSTPIEWIKEEFAKLGHTVRYANNIKKRFSGQPLDLFEVEIEAKPNNSSILVTTLLGHQEVKIEKSLHNIDAVQCHRCQKFGHTKNYCRRPFICVKCGNNHPSTECPRQKGSPKCANCLGEHVASYKGCKSFKEACKIKESTKLQLNAKMDQLITMLTLLTNCMMAK
Dmoj\TR1D	D. mojavensis	Gag	GenBank	Genome Res. 17: 1909-1918 (2007)	SPRQTPPSGPSRDQSRHTDKRKLIHHFEDINLESHTFQIKSERGFRILIRHLHRSTPIEWIKEELAKLGHTVRYANNIKKRFSGQPLDLFEVEIESKPNNSGILDTTLLGHQKVKIEKSLHNIDAVQCHRCQKFGHTKNYCRRPFVCVKCGMNHPSTDCPRQKGSPKCANCLGEHVASYKGCKSFKEACKIKESSKTQLNAKLDNLVTMLTMLTRCMMAK
Dvir\TR1A	D. virilis	Gag	GenBank	Genome Res. 17: 1909-1918 (2007)	NYHTKPTSDRRIQCNDISSYRALVRFFEESNVESHTYQLSSDRGFRVVIRHLHRATPNDWIKQKLSEKGHNVRFVNVIKKRFTGEPLDLFQVELEPKKNNNEIFDLTVLGGQRVKVEKPRRNTDVVQCHRCQQIGHTKNYCRRIFRCVKCGQEHPSTLCEKAPSAAKCANCKGPHVASYRGCIFFKNNAKKREPAVLQIDRLVDLMTSMMATVSTLMTTI
Dper\HTR1A	D. persimilis	Gag	GenBank	Genome Res. 17: 1909-1918 (2007)	TYDTKTANNGKVMCHTIDGYRTLIRLLSEEGVEYHTYRLRSERGMRVVIRHLHRSTPTDWVREQLDKLGYKVRHIANIPKRFTKEPLDLFEVELEPHETNNRIYELTAICSQRIKVEKPIRAPGVPQCHKCQMFGHSKNYCSRAVVCLKCGEKHDPKDCPKKREDPKCANCNGPHVASYRGCIKYKEYCNRRRNGLEQLEEKVDVLIAQMTRLTDCLYAG
Dpse\HTR1A	D. pseudoobscura	Gag	GenBank	Genome Res. 17: 1909-1918 (2007)	TYDTKTAHNGKVMCHTMDGYRALIRLLSEEGVEYHTFRLRSERGMRIVIRHLHRSTPTDWVREQLDRLGYKVRHIANIPKRFTKEPLDLFEVELEPQETNNSIYELTAICSQRIKVEKPIRAPGAPQCHKCQMFGHSKNYCNRAVICLKCAEKHDPKDCPKKREDPKCANCNGPHVASYRGCVKYKEYCNRRNNGLENLEEKVDVLIAQMTRLTDCLYAG
Dper\TR1A	D. persimilis	Gag	GenBank	Genome Res. 17: 1909-1918 (2007)	TYDTRPAANRKVMCHTIDGHRALIRLLNEQGVEHHTFRLKSERGMRIVIRHLHRSTPTDWVREQLGRLGYKVRHIANILKRFTKEPLDLFEVELEPQDINNSIYELTAICSQRVKVEKPIRAPGVPQCHKCQMFGHSKNYCNRAVICLKCGDKHDPKDCPKKREEPKCANCEGPHVASYRGCVKYKEYCNKRRNGLDQLEGKMDILIEQMTKLTDCLYAS
Dpse\TR1A	D. pseudoobscura	Gag	GenBank	Genome Res. 17: 1909-1918 (2007)	TYDTRPAANRKVMCHTIDGHRALIRLLNEQGVEHHTFRLKSERGMRIVIRHLHRSTPTDWVREQLGRLGYKVRHIANILKRFTKEPLDLFEVELEPQDINNNIYELTAICSQRVKVEKPIRAPGVPQCHKCQMFGHSKNYCNRAVICLKCGDKHDPKDCPKKREEPKCANCDGPHVASYRGCVKYKEYCNKRRNGLDQLEGKMDILIAQMTKLTDCLYAS
Dvir\HTR2B	D. virilis	Gag	GenBank	Genome Res. 17: 1909-1918 (2007)	WVRMELRRLGHEVRYVGVIKQRFTAKPINTFEIELVKNENNTKILELKQLGSQEIKVERQRKRTDPVQCHRCQAYGHSKNYCRRPFVCLKCGQGHPTTTCSKTRGESKCANCQGQHVKFATKSTQTGRVQCADIEAYNATIALLDASNVHRHTHQMRNERGFRIIIRHLHHTTPCDANYKGCKAFKDERARLSANRARNAYPANKLHGTATRTLASLTAS
HETAVIR	D. virilis	ORF1	flybase: transposon sequence set v9.42	Proc. Natl. Acad. Sci. U.S.A 100(24), 14091-14096 (2003)	MSDPNTTPTTHLSAEPTISPGLLSNLSGLLLSPILTMPASMNGLLSISVDSLAPATALSPQALISTASETPAQKGQEQKRAAGKETENTVSETTTTSSITAKTTATNTNIESIHIPADAQAQLAHFKRLIAQLELDTTPPNSQAADNFTSYYDEHSSSDSIVNIMDSDDAPCTPKPAQPLPMSTFRHHTPTSVVATKTSTQVISPTYAAILAGNAANQKPKNSTCISSSSDSSSNNAPGIGGPGGKITTTATTGASHYKLLHPTGKTANQIRKNNARKSNRQNSAISRLSQQDAQRRNQFANRFTLLSESDFEAPDTHQSQQLPAKTNNLAVPLQAALSPVKQSTTTTTTPTNTRAALTSIHFATAATAVNATPSNSPDCQQQQQAGAINVSAPAAKHY…
Dvir\HTR0A	D. virilis	Gag	GenBank	Genome Res. 17: 1909-1918 (2007)	DYGLKLGSPGRILPKTLETYSKIINVLNLNSINYNTYQRREERSFRVVVRGIHASTSTDAIRNELTCMGYTIRNVYCPKYKNRSGPPNIFFVELAPDPAKNRTIFGIKNLCKYVVRFEWKINGKKLPQCHRCQRFNHTARYCRHPARCVKCGNEHLTQTCVKPANVATCANCGSDHTANYKGCPLYLDLLQAKLLSLPNLLQMANKQQEQLDGLMGSVLIL
HeT-A2_DVi_1p	D. virilis	ORF1	repbase	Repbase Reports 12(9), 1938-1938 (2012)	NYLPLTTLTIIAMSNPDTSSTTYSSAELAISPGLLNDLSDMSLSPMSPMPTPLNRLQSFSADSLVAAATRATTPSALSPQAFISTACKMPAQKGQQQKRATNMKGTNIVSEPTTTKMASADAQAQLVHFKRLIAQLESDCAENAVTEHFSTNTQNVENSNIHSNGHYSGDLIANNTDSNEARQFNSPTYATILADNVAHQNSKNLLCLNCSSDSSSSHAPGIGGPGGKITTTATTGASHYKLLHPTGKTANQNRKINARKTNRQISANSRSSQQDSRRNQHANRFNLLSESDLEAPQQHLPQQLPATTKQPTTSTKIPTIAKVAMXNVHPAAAATAVNTTPPDSLSFNTQHQQADAVNISAPAAKHYKPPQICILHANQPEQNGIDSVIAKLNGQNPPI…
Dvir\HTR0B	D. virilis	Gag	GenBank	Genome Res. 17: 1909-1918 (2007)	EYGLKLGGPGRILPKTLDTYLKIINVLETNTYHFNTYQRREERSFRVVVRGIHATTSTIAIRNELSCLGYTPRSVYNPQFKNRSGSPNLFYIELAPDPIKNRTIFNVRTLCKFVVRFEWKINSKRLPQCHRCQRLNHTARYCRHSPRCVKCGDNHFTNDCTKPANLPKCANCNNSHTANYKGCPLYIELLNSKLLSMPNLLSMAQKQQEQLDRLMGWMTLM
HeT-A3_DVi_1p	D. virilis	Gag	repbase	Repbase Reports 12(9), 1939-1939 (2012)	MISASRKIVNTPAPPATAVAPPFLTTATATTTTTTETPSFPSYAAALAHNNAAPLAQITIIRSGTSSSPTSSNNDDCNNSNLPISGEKLFHKQQLISTKAVSQTRRKTARILNRKISAKSRLTQQYTSSNARLASNRFSLLSESDLDASDHQLQPKSSPPKQRQANAMINSLASAVQSALTACPPSSPMLAPTTTTSTHNAPTAQTAAIAATPKTASIPAASTTIPFYXAVTNAPPNIVTNFLSAPIQQQHEQHTNFNPVPKQFKPPQICVQHNESNWNGIDSLVAKLNGHNPPIVDYGLKLGGPGILRIIPKSTQTHEHIIHILETDSSINFNTYQKRDERSIRVVVRGIHASISTTKIRNELSDMGYIIRNVYNPVYRNRSNPGHHCPNLFFIELAH…
Jockey	D. melanogaster	Gag	repbase	Derived from M22874 (g157823) (Rel. 47, Last updated, Version 5)--20-Aug-1997	ISIALYGISIKTIDIMENSFAQSRPSNGCDKFEKMRKVAGVEPGELRSQLRASCAVVSPNLEGMPTQSAVSSLMVTISSNTNASVTCTISNVQANMICTPTYTDCTTVTTSICPTTPYDNGLPTPLSSLPNKPSKANCPFQAHDRTVNRKRKGVSQPPLPILTPSPSRKTKRQATMPLNEEASTSTAAALNNNRFALLSAEAENMEQDVSDADSDIEDSAARDGGGQSAKYSKPPAICVPSVSDPVTLERALNLSTGSSNYYIRISRFGVSRIYTANPDAFRTAVKELNKLNCQFWHHQLKEEKPYRVVLKGIHANVPSSQIEQAFSDHGYEVLNIYCPRKSDWKNIQVNEDDNEATKNFKTRQNLFYINLKQGPNVKESLKITRLGRYRVTVERATRR…
TART-A_2p	D. melanogaster	ORF2	repbase	Mol Biol Evol 21(9), 1613-1619 (2004)	MTRACNRDILKIAFWNAGGINNKIDELKLFILNIDAHIVIVTETRLDNKSTKLELPGYFTYLAQNPVSSKRGGVATIVNSSIRHMALEPIEKECIQSAPIVLLPENNRRSEMIVIASVYCPPSLSWSPHHFTDVLNFAEKTLGGQTKFILCGDWNAKHRQWGCTRACQRGTALYEAVQADPMAEIIATGCATHFPHDTRKNPSAIDFSICKGLGRLEKRISSSADLSSDHLPILLEINLDTSNLFLQKQNNNILKKTTNIELFKTVLERKILLNTEIRVAEDINDAINIFIKNIKDSADESTPSPRIPDNLRRMHGQANRNSHTLTLDENTSRLLEEKRILSRIFKATRTDEDKAKLKAAENRLKKAVKILREKRINKQIEGIDTKNPDRMRKMWRLLD…
TART_DV_2p	D. virilis	ORF2	repbase	Proc. Natl. Acad. Sci. USA 100(6), 3363-3368 (2003)	MQKPTVSKSPPKSPHNASEITANSAVPPHRATEECSISERAKSELSQLQQQLTKNPQKQLSREHRRQQLLRLCEEEERLMPDVPAQQPTLTLKHKPKLKTVLANSSPPSSAPLRMSLTKSSKAKARKESQSSACREKSPEENTYVNVLESDDESDIAANKNYDQPQQQTTIAQVHNFNTNTSITSTPKAASHCDPSPNVSAHEVELHNVDNTREASYVNNIDELTDVFDDEDDDDDCYRPAAVINSSVADMLNRTTTVEHNSTATANRGEILANVKTSDAFAANKINSITFEKIEPIPQTITPTVAKGPKFNCSMLPTTSLSAKKSLKRKGTLPQQSKQKRAQTLAVQGNSRPGMKIQDFLKSSTRVTKATNKAAIINKYKKSNRNTKKVNPSSSTKLN…
TART-C	D. melanogaster	ORF2	flybase: transposon sequence set v9.42	Fly 2, 101-110 (2008)	MLFLVTSEVTFPMTRECNRDILKIAFWNAGGINNKIDELKLFILNIDAHIIIVTETRLDNNSTKLELPGYFTYLAQNPASSKRGGVATIVNSSLRHMALEPIEKECIQSAPIVLLPENNRRSEMIVIASVYCPPSLSWSPHHFTDVLNFAEKTMGGQTKLILCGDWNAKHRQWGCIRACQRGAALYDAIQADSMAEIVATGSATHFPHDTRKSPSAIDFSICKRLGRYEKRISSSAHLSSDHLPILLEINLDIKTISLQKQNNNILKKTTNIELFKNVLERKILLNTEIRVAEDINDAINIFIKNIKDSAAESTPSPRIPDNHRRRYGQANRNSHTLTLDENTSRLLEEKRIQSRIFKATRTNEDKTKLKAAENRLKKVIKILREKRINEQIEGIDTNN…
Dmel\TARTC	D. melanogaster	RT	GenBank	Genome Res. 17: 1909-1918 (2007)	SILRLGYYPEAWKHAQVKMILKPGKSSNEPKSYRPISLLSGLSKMFERLLLKRLFRVDLFKKAIPLHQFGFRKEHGTEQQIARVTQFILEAFERKEYCSAVFLDISEAFDRVWHEGLLLKLAKILPYNLYIILESYLTNRTFEVKDQAGETSRTGQIGAGVPQGSNLGPLLYSIFSSDMPLPYIYRPSPTQRIMLSTYADDTIVLSSDTLATAATRNNENYLKTFSDWADKWGISVNAAKTGHVIFTLKNDLPTNSMNVKIKGQTIKKESKQSYLGVTLDSKLTLSSHVTKLLGKYSTAYRKLTWILNGRSKLPTKTKILILKSVLSPIWQYAIAAWGPLVTDAQIRRVQVEENRKIRDICRAGRYTRNQTI
Dyak\TART2	D. yakuba	RT	GenBank	Genome Res. 17: 1909-1918 (2007)	SILRLGYYPEAWKHAQVKMILKPGKSSNEPKSYRPISLLSGLSKMFERLLLKRLFRVDLFKKAIPLHQFGFRKEHGTEQQIARVTQFILEAFERKEYCSAVFLDISEAFDRVWHEGLLLKLAKILPYNLYIILESYLTNRTFEVKDQAGETSRTGQIGAGVPQGSNLGPLLYSIFSSDMPLPYIYRPSPTQRIMLSTYADDTIVLSSDTLATATTRNNENYLKTFSDWADKWGISVNAAKTGHVIFTLKNDLPTNSMNVKIKGQTIKKEAASYLGVTLDSKLTLSSHVTKLLGKYSTAYRKLTWILNGRSKLPTKTKILILKSVLSPIWQYAIAAWGPLVTDAQIRRVQVEENRKIRDICRAGRYTRNQTI
TART-B	D. melanogaster	ORF2	flybase: transposon sequence set v9.42	Fly 2, 101-110 (2008)	MTRADNRDILKIAFWNAGGINNKIDELKLFILNIDAHIIIVTETRLDNNSTKLELPGYFTYLAQNPVSSKRGGVATIVNSSIRHMALKPIEKECIQSAPIVLLPENNRRSEMIVIASVYCPPSLRWLPHHFTDVLNFAEKTLGGQTKFILCGDWNAKHRQWGCTRACQRGTALYEAVQADSTAEIIATGCATHFPHDTRKNPSAIDFSICKGLGRFEKRISSGADLSSDHLPILLEINLDTNTLFLQKQNNNILKKNTNIELFKKVLERKILLNTEIRVAEDINDAISTFMKNIKDSAAESTPSPRIRDNPRRRHRQANRNSHTLALDENTSRLLEEKRILSRVFKATKNYEDKAKLKAAENRLKKAIKILRENRINEQVEGIDTSNPDRMRKMWKLLD…
TART_B1	D. melanogaster	ORF2	repbase	Direct Submission to Genbank (29-AUG-1994)	MTRADNRDILKIAFWNAGGINNKIDELKLFILNIDAHIIIVTETRLDNNSTKLELPGYFTYLAQNPVSSKRGGVATIVNSSIRHMALKPIEKECIQSAPIVLLPENNRRSEMIVIASVYCPPSLRWLPHHFTDVLNFAEKTLGGQTKFILCGDWNAKHRQWGCTRACQRGTALYEAVQADSTAEIIATGCATHFPHDTRKNPSAIDFSICKGLGRFEKRISSGADLSSDHLPILLEINLDTNTLFLQKQNNNILKKNTNIELFKKVLERKILLNTEIRVAEDINDAISTFMKNIKDSAAESTPSPRIRDNPRRRHRQANRNSHTLALDENTSRLLEEKRILSRVFKATKNYEDKAKLKAAENRLKKAIKILRENRINEQVEGIDTSNPDRMRKMWKLLD…
Dmel\TARTB	D. melanogaster	RT	GenBank	Genome Res. 17: 1909-1918 (2007)	SILRLGYYPEAWKHAQVKMILKPGKSANEPRSYRPISLLSGLSKIFERLLLKRLFKVDLFKKAIPLHQFGFRKEHGSEQQIARVTQFILEAFERKEYCSAVFLDISEAFDRVWHEGLLLKLAKILPYNLYIILESYLTNRTFEVKDQAGETSRTGQIGAGVPQGSNLGPLLYSIFSSDMPLPYIYRPSPTERIMLSTYADDTIVLSSDTLATAATRNNENYLKSFSDWADKWGISVNAAKTGHVIFTLKNDLPTSLRTMKIKGQVIKIESKQSYLGVILDSKLTLSSHVTKLMGKYTTAYRKMTWILNRRSKLPTKTKMLILKSVLSPIWQYAIAAWGPLVTDAQIRRIQVEENRKMRDICRAGRYTSNQTI
TART-A_2p	D. melanogaster	ORF2	repbase	Mol Biol Evol 21(9), 1613-1619 (2004)	MTRACNRDILKIAFWNAGGINNKIDELKLFILNIDAHIVIVTETRLDNKSTKLELPGYFTYLAQNPVSSKRGGVATIVNSSIRHMALEPIEKECIQSAPIVLLPENNRRSEMIVIASVYCPPSLSWSPHHFTDVLNFAEKTLGGQTKFILCGDWNAKHRQWGCTRACQRGTALYEAVQADPMAEIIATGCATHFPHDTRKNPSAIDFSICKGLGRLEKRISSSADLSSDHLPILLEINLDTSNLFLQKQNNNILKKTTNIELFKTVLERKILLNTEIRVAEDINDAINIFIKNIKDSADESTPSPRIPDNLRRMHGQANRNSHTLTLDENTSRLLEEKRILSRIFKATRTDEDKAKLKAAENRLKKAVKILREKRINKQIEGIDTKNPDRMRKMWRLLD…
Dmel\TARTA	D. melanogaster	RT	GenBank	Genome Res. 17: 1909-1918 (2007)	SILRIGYYPDAWKHAQVKMILKPGKSVNDPKSYRPISLLSGLSKMFERLLLKRLFRVDLFKKAIPLHQFGFRKEHGTEQQIARVTQFILEAFERKEYCSAVFLDISEAFDRVWHEGLLLKLAKILPYNLYIILESYLTNRTFEVKDQAGETSRAGQIGAGVPQGSNLGPILYSIFSSDMPLPHIYHPSPTERIMLSTYADDTIVLSSDILATAATRNNENYLKTFSDWADKWGISVNAAKTGHVIYTLKNDIPTNLKTMKIKGQAIKKESKQSYLGVILDSKLTLSPHVTKVVGKYLTAYRKMSWILNERSKLPTNTKMLILKSVLSPIWQYAIAAWGPLVTDAQIRRIQVEENRKMRDICRAGRYTKNQTI
Dmau\TART	D.mauritiana	RT	GenBank	Genome Res. 17: 1909-1918 (2007)	SILRIGYYPDAWKHAQVKMILKPGKSVNDPKSYRPISLLSGLSKMFERLLLKRLFRVDLFKKAIPLHQFGFRKEHGTEQQIARVTQFILEAYERKEYCSAVFLDISEAFDRVWHEGLLLKLAKILPYNLYIILEGYLTNRTFEVKDQAGETSRTGQISAGVPQGSNLGPLLYSIFSSDMPLPYIHRPSPTERIMLSTYADDTIVLSSDILPTAATRNNENYLKTSSNWADRWGISVNASKTGHVIYTLKNDIPTNLKTMKIKGQAVKKESKQSYLGVILDSKLTLSPHVTKVVGKYLTAYRKMSWILNERSKLPTNTKMLILKSVLSPIWQYAIAAWGPLVTDAQIRRIQVEENKKMRDICRAGRYTKNQTI
Dsec\TART	D. sechellia	RT	GenBank	Genome Res. 17: 1909-1918 (2007)	SILRIGYYPDAWKHAQVKMILKPGKSVNDPKSYRPISLLSGLSKMFERLLLKRLFRVDLFKKAIPLHQFGFRKEHGTEQQIARVTQFILEAFERKEYCSAVFLDISEAFDRVWHEGLLLKLAKILPYNLYIILESYLTNRTFEVKDQAGETSRTGQIGAGVPQGSNLGPLLYSIFSSDMPLPYIHRPSPTERIMLSTYADDTIVLSSDILPTAATRNNENYLRTFSDWADKWGISVNASKTGHVIYTLKNDIPTNLKTMKIKGQAVKKESKQSYLGVILDSKLTLSPHVTKVVGKYLTAYRKMSWILNERSKLPTNTKMLILKSVLSPIWQYAIAAWGPLVTDAQIRRLQVEENRKMRDIFRAGRYTKNQTI
Dsim\TART	D. simulans	RT	GenBank	Genome Res. 17: 1909-1918 (2007)	SILRLGYYPEAWKHAQVKMILKPGKSTNEPKSYRPISLLSGLSKIFERLLLKRLFKVDLFKKAIPLHQFGFRKEHGTEQQIARVTQFILEAFEKKEYCSAVFLDITEAFDRVWHEGLLLKLAKILPYNLYIILESYLTNRTFEVKDQAGETSRTGQIGAGVPQGSNLGPLLYSIFSSDMPLPYIHSPSPTERIMLSTYADDTIVLSSDILPTAATRNNENYLKTFSDWADRWGISVNASKTGHVIYTLKNDIPTNLKTMKIKGQAVKKESKQSYLGVILDSKLTLSPHVTKVVGKYLTAYRKMSWILNERSKLPANTKMLILKTVLSPIWQYAIAAWGPLVTDAQIRRIQVEENKKMRDICRAGRYTKNQTI
Dyak\TART	D. yakuba	RT	GenBank	Genome Res. 17: 1909-1918 (2007)	SILRIGHYPDNWKHATVKMILKPGKSANDPKSYRPISLLSGFSKIFERLLLKRLVKIDSFRKAIPLHQFGFRKDHGAEQQIARVTQFILEAYERKEYCSAVFLDITEAFDRVWHEGLLLKLAKILPFNLYTILESYLTNRTFEVKDPTGEPSRTGQIGAGVPQGSNLGPILYSIFSSDMPIPRTHSVSPTGEMLLSTYADDTVVLSTDQLPTAAIRNNQNYLETFSDWADKWGIKVNAAKTGHVIYTLKNDLPTNLKTIKIRGNKIKNQNKQSYLGVILDNKLKLTLSSHVTKLVGKFTAAHKKLTWILSERSKLPDNTKMLIFKTILSPIWQYAIPAWGPLVTDAQIKRIQVEENLKMRKICRAGRFTRNQFI
Dvir\TART	D. virilis	RT	flybase: transposon sequence set v9.42	Proc. Natl. Acad. Sci. USA 100(6), 3363-3368 (2003)	RRGVELLRSIHSNKKLNILATGGATHFPYTSRNRPSAIDIAVYRALTMTGLQTHSTIDLESDHLPIHIGLRVGRFPYKQTTMRLLPINANVKKFQNHLDKNVRLNTEIISGPDIEDAIDILNKNIYNASLAATHPPRRHQQQQRQGTNTNRMNHGRFKLTNETIRLLAIKRQRKREHMVMRTPLTRSRLSQAQNKLKKALRMDKKKQTNKMFEQIDATDRYKIQKLWRITNNIKRQPEPNWPLKIQATDNNNSRSNRTQWTKTSKEKAEVFAAYLEQRFSPIFSNTAEYRLQVNNEINTRQQTNDCDSGAGVAGVIPFRPITYTEVTKEIGCLTIKKAAGIDNIDNRVIKALPKKAILYLVMIYNCILRHGHFPRQWKCAAIKTILKPGKPTEDVASYR…
TART_DV_1p	D. virilis	ORF2	repbase	Proc. Natl. Acad. Sci. USA 100(6), 3363-3368 (2003)	MTGLQTHSTIDLESDHLPIHIGLRVGRFPYKQTTMRLLPINANVKKFQNHLDKNVRLNTEIISGPDIEDAIDILNKNIYNASLAATHPPRRHQQQQRQGTNTNRMNHGRFKLTNETIRLLAIKRQRKREHMVMRTPLTRSRLSQAQNKLKKALRMDKKKQTNKMFEQIDATDRYKIQKLWRITNNIKRQPEPNWPLKIQATDNNNSRSNRTQWTKTSKEKAEVFAAYLEQRFSPIFSNTAEYRLQVNNEINTRQQTNDCDSGAGVAGVIPFRPITYTEVTKEIGCLTIKKAAGIDNIDNRVIKALPKKAILYLVMIYNCILRHGHFPRQWKCAAIKTILKPGKPTEDVASYRPISLLAGFSKIFERLLMYRLYECSEFAKAVPLHQFGFRKDHGTEQQL…
Dvir\TR2A	D. virilis	RT	GenBank	Genome Res. 17: 1909-1918 (2007)	CILRHGHFPRQWKCAAIKTILKPGKPTEDVASYRPISLLAGFSKIFERLLMYRLYECSEFAKAVPLHQFGFRKDHGTEQQLARVTQFILSAFEKKQYCSAVYIDIREAFDRVWHEGLLLNLARYCLIGCIMVLKSYLLDRTFIVHGNEGIKSRIGKVSAGVPQGSVLGPILYIIYTSDMPLPHIATPPNPTTTAATITNTETSITNPYNCSMLLSTFADDTVIMSSADILQTSYSANQTYLRQFTIWCNRWCIQINDSKSAHVVHTLRNLNSRMNYLTPRLNGQEIPSKPRQKYLGVHLDRKLHMQHHVTQLRCRLKALYNKLEWLIGNKSVLSVECKITIYKQMIAPIWRYALPIWGAMISDTQLRRIESTQNWILRKIVKASWWTRNKDI
TART_DV_3p	D.virilis	ORF2	repbase	Proc. Natl. Acad. Sci. USA 100(6), 3363-3368 (2003)	VKSMMADTPLTLLVTPQLLQQHICPTLTVHCLTGEGQTLFQMTNHSSDQYGNSFKIAYWNAAGVRNKLNELEVFMNRHKIDIMMLVELRLGPSALNPGPPITINGYHTYAATRPPPHHRCGGVATLVKHGIKHIALEAIVFESMQSAPVAVTLAKNETIVLAPIYCPPQYNWSADMFAKLFQHFEKLSGSGFILCGDWNAKHSWWGNQRACRRGVELLRSIHSNKKLNILATGGATHFPYTSRNRPSAIDIAVYRALTMTGLQTHSTIDLESDHLPIHIGLRVGRFPYKQTTMRLLPINANVKKFQNHLDKNVRLNTEIISGPDIEDAIDILNKNIYNASLAATHPPRRHQQQQRQGTNTNRMNHGRFKLTNETIRLLAIKRQRKREHMVMRTPLTRSR…
Dvir\TR2B	D. virilis	RT	GenBank	Genome Res. 17: 1909-1918 (2007)	CILRHGHFPRQWKCAEIKMVLKPGKPTEEVSSYRPISLLAGFSKIFERLLMTRMFECKDFAQAVPNHQFGFRKEHGTEQQLARVTQFILKAYENRQYCSAVFIDIREAFDRVWHEGLLSKLAKLLPAVLWNVLKSYLTDRTFIVNGNEGTRSRIGHISAGVPQGSVLGPILYIIYTSDMPLPSLVLRSLWPTTRSTTSASADTSLIPSTLLSTFADDTVIMCSEPLPDRAVTKNQRYLHEFEKWTKRWCIQVNVSKTAHVMFTLRTIQRHSQTPTSPRLYGQQITNKTRHQYLGINLDKKLNMNHHVTTLCARTRALCNKLDWLIGANSPLSIDCKMMIYKQMIAPIWRYALPIWGALVSATQFQRLEVGQNKILRKIARATRYTRNQSI
Dana\TR2A	D. ananassae	RT	GenBank	Genome Res. 17: 1909-1918 (2007)	CMLRYSYFPKQWKRAAITMIKKPGKTPHEVSSYRPISLLPGFSKIFETLLMHRMFKIQDFERAIPSHQFGFRKQHSTEQQLLRVTQHILSAYEQKMYCSAVFIDVSEAFDRVWHDGLLLKLAKLLPHSLYKILQSYLTDRSFTMNSTNGIPSRTGKISAGVPQGSVLGPILYTVFTSDMPLPEVISSQHTYNPSYFENMMLSTYADDTIILCTKREPQLAIQTTESFLKYITDWATNWCITLNPNKTIHVLFTKRSVANLTGNKSPKMKGILIKNEPKHRYLGLILDRKLLLHHHINQLQNRIRNVAAGLNWIIGTKSKLSPQSKILLYKQIIAPIWQYALPLWGALTSNTQFQRIEAAQSKLIRKILKAGRYTRNQVL
Dper\TR2A	D. persimilis	RT	GenBank	Genome Res. 17: 1909-1918 (2007)	CILRHGHFPKQWKCAAITMIKKPSKNANEVGSYRPISLLAGFSKIFETLLMERMFECEDFEKAIPSHQFGFRKEHSTEQQLARVTQYILDAYEKQLFCSAVFIDVSEAFDRVWHNGLLLKLAKLLPFTYYNVLKSYLADRTFIVNGNNGIRSRPGRICAGVPQGSVLGPVLYTVFTSDMPLPHLSEQNERIESNIYNNMMLSTYADDTIILCAKKEASTAVRTNQCYLEHFTAWASKWCISLNTSKTVHVLYTRRSIANGIGELSPKMYNEAIKSKPRHRYLGLIMDRKLVLHAHTTQLAIRVRAAAIRLNWIIGHQSRLSKRCKMVIYKQLIAPIWQYALPVWGALVCESQFCRVESAQNQLLRKIVKASRYTRNQVI
Dpse\TR2A	D. pseudoobscura	RT	GenBank	Genome Res. 17: 1909-1918 (2007)	CILRHGHFPKQWKCAAITMIKKPSKNANEVGSYRPISLLAGFSKIFETLLMKRMFECEDFEKAIPSHQFGFRREHSTEQQLARVTQYILDAYEKQLFCSAVFIDVSEAFDRVWHNGLLLKLAKLLPFTYYNVLKSYLADRTFIVNGNNGIRSRPGRICAGVPQGSVLGPVLYTVFTSDMPLPHLSEQNERIESNIYNNMMLSTYADDTIILCAKKEASTAVRTNQRYLEHFTAWASKWCISLNTSKTVHVLYTRRSIANGIGELSPKMYNEAIKSKPRHRYLGLIMDRKLVLHAHTTQLAIRVRAAAMRLNWIIGHQSRLSKRCKMVIYKQLIAPIWQYALPVWGALVCESQFCRVESAQNQLLRKIVKASRYTRNQVI
Dgri\TR2A	D. grimshawi	RT	GenBank	Genome Res. 17: 1909-1918 (2007)	SILRFGHFPQQWKCAGITMLLKPGKSTESVSSYRPISLLSGFSKLFEKVLMRRLFECKDFASAVPSHQFGFRKEHSAEQQLARVTQFILGAYERRQYCSAVFVDISEAFDRVWHAGLLYKLIRLLPPTLYRVLQSYLSDRSFVVNTGGVRSRPGIICAGVPQGSVLGPILYTISSSDMPLPSLIRSEQLSAFPSDCTMLLSTYADDTIVLCAHNGAREAIRGNQCFLNKFMAWANYWCIKINVSKTAHVVFSRRRPAHSLKLPAIKLDGQIVEMQSKQRYLGLLLDRKLILHSHVTQLCIRLRALCRKLDWLLGRSSMLHRSCKVVVYKQLMAPVWQYAFPIWGALVSNTQMRRIETLQNVILRKILQVSWYTRNQVI
Dvir\TR2C	D. virilis	RT	GenBank	Genome Res. 17: 1909-1918 (2007)	CILRYGFFPRQWKCAEISMILKPGKSTGEISSYRPISLLAGFSKLFEKLLLNRLFECKEFANAIPSHQFGFRKDHGTEQQLARVTQYILNAYEKRQYCSAVFIDISEAFDRVWHAGLLVKLIKLLPLALYNVLESYLAERIFIVKCNDGIKSRPGKVCAGVPQGSVLGPILYTIFSSDMPLPRLVMKEYASFEPNKMQLSTYADDTIVMCASQNILEAVNLNEKYLIHLMRWAEKWCIKINSSKTAHVMFSMRRLDATLVRLCPMINGQTIENNGRHRYLGLVLDRKLTLNIHITQLCIRLRGVHKKLDWLLGKNSRLARNCKAVVYKQLIAPIWQYALPVWGALVSNSQIKRIETMQNKILRACMNASWYTRNQTL
Dmoj\TR3A	D. mojavensis	RT	GenBank	Genome Res. 17: 1909-1918 (2007)	SMLRLDYFPSKWKHAIVTMIQKQGKMSSDVKSYRPISLTSGFAKIFEKLLLTRLFEVEDFAKAMPSHQFGFRRKHGTEQQLARVTQFILRAYERKQYCSAVFIDIAEAFDRVWHEGLLLKLAKLLPIRLFNILESYLENRTFVVSCNGVTSRVGRVSAGVPQGSVMGPILYTIFSSDMPLPSQEHTNRIGLPQEEMLLSTFADDTVIMSAADLPVMAVRANERYLQHFEKWTKKWAINLNANKTGHVLFSLRQSNRRELQVTPKVFGKAVPYKCSHTYLGITLDRKLNMKQHVARLRAKIRTRAAKLDWMIGRDSLLAKSCKAVLIKQLIMPLWQYALPIWGALTTESQITRIQGMQNRIIRRALRVPWLTRNAAI
Dper\TR3A	D. persimilis	RT	GenBank	Genome Res. 17: 1909-1918 (2007)	SIFRLGHFPSQWKHAQIKMILKPGKNTADMCSYRPISLLSGLSKIFEKLLMARLFEVENFAKAVPNYQFGFRREHGTEQQLARVTQYILKAYEKKQVCSAIFLDISEAFDRVWHEGLLYKLMKLLPLNLYCILESYLAERTFRVSCGDEELSRIGKISAGVPQGSVLGPILYTIYASDMPMPHLIQDSTGFHPERETMLLSTYADDTVIMSASGIPNVAVKYNQRYLTHFSIWAKKWCININAKKTGHVIFTLRTIRSTDLRQTPTINGQAVPLAKSHTYLGIKLDKKLTLSSHITRICTKLRSRAAKLDWLAGPKSRLPSETKAIVIKQLIMPIWQYGLPVWGALTSDSQLRRVQSLQNKIIRRAMKATRFTRNDAI
Dpse\TR3A	D. pseudoobscura	RT	GenBank	Genome Res. 17: 1909-1918 (2007)	SIFRLGHFPSQWKHAQIKMILKPGKNTADMCSYRPISLLSGLSKIFEKLLMARLFEVENFAKAVPNYQFGFRREHGTEQQLARVTQYILKAYEKKQVCSAIFLDISEAFDRVWHEGLLYKLMKLLPLNLYCILESYLAERTFCVSCGNEELSRIGKISAGVPQGSVLGPILYTIYASDMPMPYLIPDSTGFHPERESMLLSTYADDTVIMSASAIPNVAVKNNQRYLTHFSIWAKKWCININAKKTGHVIFTLRTIRSTDLRQTPTINGQAVPLDKSHTYLGIKLDKKLTLSSHITRICRKLRSRAAKLEWLAGPKSRLPNETKAIVIKQLIMPIWQYGLPVWGALTSDSQLRRVQSLQNKIIRRAMKATRFTRNDAI
Dper\TR4A	D. persimilis	RT	GenBank	Genome Res. 17: 1909-1918 (2007)	SMLRLGHFPQAWKHATITLLLKPNKPAQSVTSYRPISLLSGLAKTFEKLFIKRLFDFEDFSRALPTHQFGFRKEHATEQQLARVTQFIMGAFEEKQYCSAVFIDISEAFDRVWHTGLLYKLSKLVSLQAFKLLESYLNERTFEVITNNGITSRIGKIKAGVPQGSNLGPLLYSIYSSDVPLPNCLNGYHPTSIPVLREKNRMLATYADDTIIMSRADFPLTAAKMNEQYLNKFSVWAKKWEMGINEKKTAHVFFTLNKLSKTQQESTPKLNGQRIPNKFKQMYLGVTLDRKLSLNHHVKAIINKTRTASIKLDWIIGCKSRLAKECKVTILKQLIMPIWFYAFPVWGALASDSLVKKIQTLQNKLVRRAVRATIYTRNDNI
Dpse\TR4A	D. pseudoobscura	RT	GenBank	Genome Res. 17: 1909-1918 (2007)	SMLRLGHFPQAWKHATITLLLKPNKPAQSVTSYRPISLLSGLAKTFEKLFIKRLFDFEDFSRALPTHQFGFRKEHATEQQLARVTQFIMEAFEEKQYCSAVFIDISEAFDRVWHTGLLYKLSKLVSLQAFKLLESYLNERTFEVITNNGITSRIGKIKAGVPQGSNLGPLLYSIYSSDVPLPNCLNGYHPTSIPVLREKNRMLATYADDTIIMSRADFPLTAAKMNEQYLNKFSVWAKKWEMGINEKKTAHVFFTLNKLSKTQQESTPKLNGQRIPNKFKQMYLGVTLDRKLSLNHHVKAIINKTRTASIKLDWIIGCKSRLAKECKVTILKQLIMPIWFYAFPVWGALASDSLVKKIQTLQNKLVRRAVRATMYTRNDNC
Dper\TR4B	D. persimilis	RT	GenBank	Genome Res. 17: 1909-1918 (2007)	SIMRLGHFPQAWKHATIALILKPNKPAQSVASYRPISLLSGLAKTFEKLFIKRLFDFDDFSRALPTHQFGFRKEHATEQQLARVTQFIMGAYEEKKYCSAVFIDISEAFDRVWHTGLLYKLSKLVSLQAFKLLESYLNDRTFEVITNNGTTSRTGKIRAGVPQGSNLGPLLYSIYSSDIPLPNCMRSYHPTEIPVLREKNRMLATYADDTIIMSIADFPSVAAKMNEQYLNKFSVWAKKWEMGINEKKTAHVFFTLNSLSRTQQESTPRINGQRIPNKFKQTYLGVVLDRKLSLSPHVKTIINKTISTSIKLDWIIGNKSHLARDCKVTILKQLIMPIWYYAIPVWGALASDSLIKKIQTLQNKLVRRSVRATRYTRNDNI
Dper\TR3B	D. persimilis	RT	GenBank	Genome Res. 17: 1909-1918 (2007)	SILRIGHYPRIWKHAEIVMIPKPKKNPSHMKSYRPISLLSGLSKVFERLLLKRLLSEEAFHKAIPDHQFGFRKEHGAEQQLTRVTQFILRAYEEKQYCSAVFIDVAEAFDRVWHEGLLSKLIKILPLRLYTILENYLSGRTFAIKCNDGIKSRTGRITAGVPQGSVLGPILNTIFSSDMPLPALTHRSLHTNPGPKKMLLSTYADDTAILSMGDYPAMAVQRNNNYLTQLVIWAKKWSITINPIKTAHVIFSKRRVQTNNIPIKIDGKQVPVKKSTIYLGVKIDSGLTMSAHVTQLRIKMWARAKKLNWLIGAGSKLAKKCKMLMIRQLIAPLWQYTLPVWGALCSNTQIKRIQGPYNKLIRCSLKAGRYARNEAL
TAHRE_2p	D. melanogaster	ORF2	repbase	Mol Biol Evol 21(9), 1620-1624 (2004)	MTFNLNNGQASNTLKIGYWNSCGITNKTNELEAYIKKEGIQIMLVTETRLERNSNALNIKGFHTYLAQNPTSHRKGGTATIVSQNIRHACLNPIETDFMQSAPIALIPSSRIRADMTIVAPIYCPPVYKWTTEQFSKLFNHFEMLLDGKSKFILGGDWNCKHRLWGNYLSCARGRSLSQSILARKDLDIVATGHATHFPFDKKKQPSALDFAICKGFHTQKLKTYSTDELSSDHLPIQIVLDPDDSDWQHNKTNNAIIQKRTDLTKFKKNLENKILLNTEIRTGQDIDDCIDILINNIKSAANEATPPNRPQNNRTYNSSRRSTNLRLDEATKRLLEEKKELNRIFRAVGTDEARRWFKNVQNRLSKEIRKLKQKLLNRNLQDIDTTDRYRTQKLWKTT…
Dmel\TAHRE	D. melanogaster	RT	GenBank	Genome Res. 17: 1909-1918 (2007)	NILRTGHFPNKWKHASISMIPKPGKSPFALNSYRPISLLSGLSKLLERILLKRLYDIDSFAKAIPSHQFGFRKDHGAEHQLARVTQFILKAFDEKDVCSATFLDITEAFDRVWHDGLLYKLSRLIPRYLFDLLENYLSNRTFSVRIDGETTSRIGNIRAGVPQGSILGPVLYSIYSSDMPYPIVKDYMRNISFPDYHPTNIILATYADDTIILSRSKYTKLAINLNQNYLNVFCRWSKKWDIAINAKKTGHILFSLKKEQTNIYTPPLINGQRAAKLNKQRYLGLMLDRRLTFCAHMTLLKGKTIAAYKKLEWLIGKNSHLPKNAKILLWKQIVSPIWHYAIAIWGSLVSDTQAKKIQTMENKYIRRIINASRYTRQADI
Dmau\TAHRE	D.mauritiana	RT	GenBank	Genome Res. 17: 1909-1918 (2007)	NILKTGHFPNKWKHASISMIPKPGKSPFALNSYRPISLLSGLSKLLERILLKRLYDIDYFAKAIPSHQFGFRKDHGTEHQLARVTQFILKAFEEKDVCSATFLDITEAFDRVWHDGLLYKLSRLIPRYLFDLLENYLSNRTFSVRIDGETTSRIGKIRAGVPQGSILGPVLYSIYSPDMPYPIIKDYMRHISFPDYNQTNMILATYADDTIILSRSKYTNFAINLNQNYLNVFCRWSKKWDISISAKKTGHILFSLKREETNAYTPPTINGQRAAKLNKQRYLGLMLDRKLTFGAHLTLLKGKTIAAYKKLELVGKNSHLPKNAKILLWKRIVSPIWHYAIAIWGSLISDTQANKIQTIENKYIRRIINASRYTRQATI
Dsec\TAHRE	D. sechellia	RT	GenBank	Genome Res. 17: 1909-1918 (2007)	NILKIGHFPNKWKHSSISMIPKPGKSPFALNSYRPISLLSGLSKLLERILLKRLYDIDYFAKAIPSHQFGFRKDHGTEHQLARVTQFILKAFEEKDVCSATFLDITEAFDRVWHDGLLYKLSRLIPRYLFDLLENYLSNRTFSVRIDGETTSRIGKIRAGVPQGSILGPVLYSIYSSDMPYPIVKDYMRHISFPDYNQTNTILATYADDTIILSRSKYTNIAINLNQNYLNVFCRWSKKWDIAINAKKTGHILFSLKREETNTYTPPTINGQRAAKLNKQRYLGLMLDRKLTFGAHITLLKGKTIAAYKKLEWLVGKNSHLPKNAKVLLWKQIVSPIWHYAIAIWGSLVSDTQANKIQTMENKFIRRIINASRYTRQATI
Dsim\TAHRE	D. simulans	RT	GenBank	Genome Res. 17: 1909-1918 (2007)	NILKTGHFPNKWKHASISMIPKPGKSPFALNSYRPISLLSGLSKLLERILLKRLYDIDYFAKAIPSHQFGFRKDHGTEHQLARVTQFILKAFEEKDVCSATFLDITEAFDRVWHDGLLYKLSRLIPRYLFDLLENYLSNRTFSVRIDGETTSRIGKIRAGVPQGSILGPVLYSIYSSDMPYPIVKDYMRHISFPDYNQTNTILATYADDTIILSRSKYTNLAINLNQNYLNVFCRWSKKWDIAINAKKTGHILFSLKREETNAYTPPTINGQRAAKLNKQRYLGLMLDRKLTFGAHITLLKGKTIAAYKKLEWLVGKNSHLPKNAKILLWKQIVSPIWHYAIAIWGSLVSDTQANKIQTMENKYIRRIINASRYTITDTI
Dere\TAHRE	D. erecta	RT	GenBank	Genome Res. 17: 1909-1918 (2007)	RILYTGHFPNIWKHAIITMILKPGKPPTELNSYRPISLLSCLSKIFERILLNRLFNIESFAKALPNHQFGFRKEHGAEHQLARVTQFILQAYEEKEVCSATFLDITEAFDKVWHQGLLYKLTKLIPRQLFNVLESYLTNRTFCVKINQETFSRTGNIGAGVPQGSILGPILYSIYTSDMPYPILKYYMPKIEFPDFHPKNILLATYADDTIILSRSNYTKIAINNNQTYLIKFCRWAKKWDIAINGKKTGHVLFSLKNNPETSYTPPSVDGQRAAKLYKQRYLGLMLDRKLTLGAHLTLLQGKIISAYKKLEWLIGSNSHLPKATKTLLWKQIISPIWHYSIVIWGSLVSATQAKKIQTLENKFLRKITSASRYTRQTTI
Dyak\TAHRE	D. yakuba	RT	GenBank	Genome Res. 17: 1909-1918 (2007)	KMLNTGYFPKKWKHACISMILKPGKSPSLLNSYRPISLLSGLSKIFERIILNRLFKIESFSKAIPNHQFGFRKGHGAEHQLARVTKFILEAYEEKEVCSATFLDITEAFDRVWHDGLLLKLTKLIPNQLFILLESYLTDRTFQVRVNNETSSRIGTINAGVPQGSILGPVLYSIYTSDMPPPILKGYIRNISLPDYQPKNIILATYADDTIIISRSNNPRTAININQTYINTFCRWAKKWDIAINGKKTGHVLFSLKEKTENIYTPPTVDGQRATKLSKHGYLGVTLDRKLTFGAHLILLKGKIIAAYKRLEWLIGKNSHLPKKTKLLLWKQIISPIWHYAIAIWGSLTSATQTKKIQTLENKLIRRIINANRYTKQLTI
Dmoj\TR1A	D. mojavensis	RT	GenBank	Genome Res. 17: 1909-1918 (2007)	NSFRLGHFPSCWKLAMVKMVHKPGKPTQHVASYRPISLLSGLSKILEYLILSRMLAQDTLVNAIPSHQFGFRKAHSAEQQLGRVTQFIIKAFDDHKYCSAVYMDIKEAFDRVWHPGLKYKLKRLLPDALYRILCCYLADRTFIVECHGGCRSGIKQIHAGVPQGSLLGPILYNIYTSDIPRPTRLRGILIATYADDVIVLSADSRQADALSQQQAYMDSLAEWASKWCITINANKTMHVMHAYRVIAPYQAIRIGNETIENGTSHPYLGVTLDSKLRFSQHVTTVVTRVRARLKKIDWLINKDSKLTLRTKVIIYKQLVAPLWQYSLPVWGALLSESQFSRIRVVHNKALRAISGAQYFISNSRI
Dmoj\TR1B	D. mojavensis	RT	GenBank	Genome Res. 17: 1909-1918 (2007)	NSFRLGHFPSCWKLAMVKMVHKPGKPTQHVSSYRPISLLSGLSKILEYLILSRMLEQDTLVNAIPSHQFGFRKAHSAEQQLGRVTQYIIKAFDDHKYCSAVYMDIKEAFDRVWHTGLKYKLKSLLPFALYRILCCYLADRSFIVECHGGCRSGVRQIHAGVPQGSLLGPVLYNIYTSDIPSPTCLHGIRIATYADDVIVLSANYRQTDALNQQQAYMHILAEWASKWCITINANKTTHIMHSLRPIAPYQAIRIGNETIENSTSHPYLGVTLDSRLRFTQHVTTVVTRVRARLKKIDWLVNKDSKLSMKTKTIIYKQLVAPLWQYSLPVWGALLSETQFSRIRVVHNKALRAISGAQYFVSNTRI
Dmoj\TR1E	D. mojavensis	RT	GenBank	Genome Res. 17: 1909-1918 (2007)	NSLRLGHFPSRWKQALVKMIHKPGKPTHIVSSYRPISLLSGLSKILEKIILSRMMELNSVVKIIPNHQFGFRKSHSAEQQLGRVTKLILQAFEAGSYCSAVYMDIKEAFDRVWHTGLRYKLKKILPMPLMSILDSYLRERTFQVECHNGVRSDLKQINAGVPQGSILGPVLYNIYTSDIPATPLHTTHGYKTMVATYADDIIILISNLRQNIAITEQQRYLNTLEAWAKKWCITVNPAKSNHIMHTLRRVLPYEPVKLNNIPIKNVTKHVYLGVTLDSKLHFDQHISSLEAKIKIRSNKINWLINSHSKLPLKVKVILYKQLIAPIWQYTLPVWGTLLSNSQFARLKVMQSKILRLITGAPWHVSNETI
Dmoj\TR1C	D. mojavensis	RT	GenBank	Genome Res. 17: 1909-1918 (2007)	SALRLGHFPDRWKCAKIKMIAKPGKPAHELSSYRPISLLSGLSKIFELLIFRRLMDVQAFSESIPDHQFGFRSEHSTEQQLGRVTKFLLEAYEDGNYCSAIYLDISEAFDRVWHAGLQYKLKKLLPKALFNIIFSYLSNRLFLVECSDYAQSSVKRFAAGVPQGSVLAPILYTIYTADIPLPRVSTSRYGSRMMLGTYADDTAILSSSICPVHSILLINQYLGSLDEWTKKWCISINYTKTIHVLHSLRRVQVDDRQAVITCAGNRIASKSSHRYLGVQLDDRLHLHTHITTLIGKLRTRSKQLNWLLNANSKLPLKIKIMFYKQLIAPIWQYALPVWGSLVTDRSFSRIQVAQNKILRSIAGAPWYVSNDNL
Dmoj\TR1D	D. mojavensis	RT	GenBank	Genome Res. 17: 1909-1918 (2007)	SALRFGHFPSRWKCARVRMIVKPGKPAHELTSYRPISLLSGLSKILEKLIMNRLFEVEAFCKAMPDHQFGFRSRHSTEQQLGRVTQFIMEAFEDNYFCSAVYLDISEAFDRVWHPGLLYKLKKLLPNVLFNILHSYLKNRTFIVECFDGTRSSVKQIAAGVPQGGVLSPILYNFYTADMPLPAISSVRRPTARMMLGTYADDTAILSSNISLTHAVQHLNHYLNTFHEWTKKWCIKLNYSKTVHVIHSIRQVQYDHQSVVTIAGNNIDNKTSHRYLGIQLDNKLLLKTHINNIIGKLRTRTKELKWIIGARSKLPLKLKILLYKLLIAPIWQYALPIWGALICETRFNKLQVAQNKILREITGAPWYVSNNTL
Dper\TR1A	D. persimilis	RT	GenBank	Genome Res. 17: 1909-1918 (2007)	SSLRIGCFPNRWKHAAVSMIPKPGKPADKLASYRPISLLSGLSKLFERLILTRMMEADGFVEAIPNHQFGFRQVHAAEHQLGRVTKFILSTYENNLYCSAIYMDIQEAFDRVWHAGLKHKMKRLLPAAIYRVLSHYLDDRSFYVECTGGVKSGNKMIAAGVPQGSVLGPVLYNLYTHDMPLPRDRGMLLATYADDTAILATGMNQLMATNKLNRFLHSISNWAKQWGITINASKTVHIVHTLRSIQQPVDDLQPHIADQRISSVAVHPYLGVKLDAKLQFHTHITNVVTKVRARVQKLRWLLNTNSRLNLNTKVMLYKQMIAPIWQYTLAVWGPLASSAEFGRIQVEQNKTLRLICNAPWYVRNDTI
Dpse\TR1A	D. pseudoobscura	RT	GenBank	Genome Res. 17: 1909-1918 (2007)	SSLRIGCFPNRWKHAAVSMIPKPGKPADKLASYRPISLLSGLSKLFERLILTRMMEADGFVEAIPNHQFGFRHVHAAEHQLGRVSKFILSTYENNLYCSAIYMDIQEAFDRVWHAGLKHKMKQLLPAALYRVLSHYLDDRSFYVECTGGVKSGYKKIAAGVPQGSVLGPVLYNLYTYDMPLPRDRGMLLATYADDTAILATGMNQLMATNKLNRFLHSISNWAKKWGISINASKTVHIVHTLRTIQQPVDDLQPHIADQRISSVAVHSYLGVKLDAKLQFHMHITNVITKVRARVQKLRWLLNTSSKLNLNTKVMLYKQMIAPIWQYTLAVWGPLATSAEFGRIQVEQNKTLRLICNAPWYVRNDTI
Dvir\TR1A	D. virilis	RT	GenBank	Genome Res. 17: 1909-1918 (2007)	GILRFGHFPYKWKCAKITMIQKPGKPSDQLGSYRPISLLAGFSKIFERLLLRRMFQLENIINAIPSHQFGFRREHAAEQQLGRVTQFILEAYEDNKYCSAVYMDIQEAFDRVWHDGLRFKLKQLLPEVLYRVMNSYLSERTFIVDCCGGTRSSLKEICAGVPQGSVLGPVLYTLYTSDMPLPAPLRHKLMLATYADDTAILSSANSQEDAIANLDLFLTTITTWTQKWSISINITKTKHIMHTWRNLQMPILSPRILDQRLTTEERISYLGVQVDKKLLLSSHVTTIVARVRDRAKKLHWLISERSKLPLKCKVTLYKQLIAPIWQFALPVWGSLLCEGQFERIQVAQNKILRTIAGAPWYVRNQSI
Dvir\TR1B	D. virilis	RT	GenBank	Genome Res. 17: 1909-1918 (2007)	SILRLGYFPSKWKCAVVIMIPKPGKPQEQLNSYRPISLLSGLSKIFEHLLLRRMYESDGFIHAIPKHQFGFRSEHGADQQIGRVTQFILEAYERNQYCAATYMDIQEAFDRVWHDGLRYKLRMILPYATYNVVSHYLAERTFMVECSGGIRSSTKRIAAGVPQGSVLGPVLYTLYTADMPIPGPISPTTGYVRHMYRKETLLATYADDTVILTVGRTQTDAVNRMNEYLEVLSAWATKWCITINATKTVHVMHTLRRLQMQTDAQTAHIGGQALLNQTVHTYLGVKLDTQLQFNRHISAVINKLRTRFKKMQWLIDSTSKLPLKTKVIIYKQLIAPIWQYTLPVWGPLASQTQIDRIQTMQNKILRSIAGAPWYVRNSTI
Jockey	D. melanogaster	RT	GenBank	Genome Res. 17: 1909-1918 (2007)	SVLDVGYFPKAWKSASIIMIHKTGKTPTDVDSYRPTSLLPSLGKIMERLILNRLLTCKDVTKAIPKFQFGFRLQHGTPEQLHRVVNFALEAMENKEYAVGAFLDIQQAFDRVWHPGLLYKAKRLFPPQLYLVVKSFLEERTFHVSVDGYKSSIKPIAAGVPQGSVLGPTLYSVFASDMPTHTPVTEVDEEDVLIATYADDTAVLTKSKSILAATSGLQEYLDAFQQWAENWNVRINAEKCANVTFANRTGSCPGVSLNGRLIRHHQAYKYLGITLDRKLTFSRHITNIQQAFRTKVARMSWLIAPRNKLSLGCKVNIYKSILAPCLFYGLQVYGIAAKSHLNKIRILQAKTLRRISGAPWYMRTRDI
