# Supplementary material for: Diversification and collapse of a telomere elongation mechanism
Source: HighWire-hosted journal article supplement (doi:10.1101/gr.245001.118), 2019-05-28
Supplement: Supplemental_Table_S2.xlsx [file Supplemental_Table_S2.xlsx]

## Sheet: Gag_Tree_Fig.1A
Table S2. List of consensus domains used for phylogenetic tree building in main text and supplement (by tab).
Species	TE-gag	Consensus_sequence
D. takahashii	TAHRE	QPSSKRGFRVMIRHLHPSTPQSWIVDELRKLGFIASYIQNVRNRITGIPYKIFFVGLRGGDVGSLPKIL
D. elegans	TAHRE	SYKTRTTKGNGVQINAVDMNSYKIIKQVLAENGISAHTHQARAERGFYVVIRHLHPSTPYKWVIDELQKIGYQTRFIQCMKNRTSGAPMKLHKLEIEPQPDGDHKSILTLKVLGNQSVKVERMHKTREPVQCYNCQGFRHSRNHCLKGPRCMKCAGNHETRVCQKPRSSPATCANCSGSHVSSYKGCPTYQKERNRYLLIK
D. melanogaster	TAHRE	TRAIDGNGVRIQAKDMTAFNKIKEVLVANGFPLFTNQPKSERGFRVVIRHLHHSTPCSWIVEELLKLGFQARFVRNMTNPATGGPMRMFEVEIVMAKDGSHDKILSLKQIGGQRVDIERKNRTREPVQCYRCQGFRHAKNSCMRPPRCMKCAGDHLSSCCTKPRSTPATCINCSGEHISAYKGCPVYKAEKQKLATNNIDINKIRDIKDATTNIYRRQGPPP
D. simulans	TAHRE	SYTTRATEGNGVRIQAKDMTAYHKIKDVLIANGFPLFTNQPKSERGFRVVIRHLHHSTPCSWIVKELLTLGFSARFVRNMTNPATGGPMRMFEVEIVMAKDGSHDKIISLKQIGGQRVDIERKNRTREPVQCYRCQGYRHAKNSCMRPPRCMKCAGDHLSSCCTKPRTTPATCVNCSGEHISAYKGCPVYKAEKQKLAANNIDTNKIRTIKDATKNFYRRQGPPP
D. sechellia	TAHRE	SYTTRATEGNGVRIQAKDMTAYHKIKDVLIANGFPLFTNQPKSERGFRVVIRHLHHSTPCSWIVKELLTLGFSARFVRNMTNPATGGPMRMFEVEIVMAKDGSHDKIISLKQIGGQRVDIERKNRTREPVQCYRCQGYRHAKNSCMRPPRCMKCAGDHLSSCCTKPRTTPATCVNCSGEHISAYKGCPFTRLKNKSWRLTTLTQTKYGHQDAQP
D. yakuba	TAHRE	SFTTKTSIGNGVTIQAKDLTAHRTIKDILAKSGIPYYSNQNKSERGFRVVIRHLHPSTPCSWITSELQKLGHQTKFTRNMTNPATGGPMRMHEIEIVSAMDGSHLRILSIKQLGGQKVEIERKNRTREPVQCFRCQGFRHARNTCMKPPRCMKCAGQHWSSECTKPRSTPATCSNCQGNHISAYKGCPAYKAEKQKLAVNRIDFHKIRTIMDAKSNNNERQPRT
D. rhopaloa	TARTAHRE	KFSTRSTPGNGVRIQCIDMETYSTVKRLLGEGNFAMFTHQKKSERGFKTVIRHLHHSTPYQWVINELQKVGFTARFVRVMRHRFNDNPMNIFECELQTSPDGSHMNVLKIQKLGSQAVIVERKHRVRDPTMCHRCQGFRHTKMYCKIPYKCMKCAEGHPTATCTKPNNVPPTCANCGGSHVSSYKGCPAFKAERSKLRSHRAANGDWPLGNTLSSPNIPPSAPS
D. melanogaster	TART	SFTTKSGLGNNIRIQAKTMDAYNAIQNVLLGANNPLHSHQPKSANGFLIVIRHLHXSTPTKWIESQLQDIGIATKFIRAMQFTDTINPMRIYEVEVVPGSHLNVLLLKSPGGQTVKVERKRISKXPIQCHRCCFGHTRNYCRNPFKCMKCGQLHATVSYTKPKNLATCANCNGSHKQSYKGCPAFQEAKTRLSINKTQLLNRIEGMEKKLNNLLEIVTRL
D. sechellia	TART	TTKSELGNNIRIQAKTMDAYNAIQNVLLEANIPLHSHQPKSAKGFQIVIRHLHQSTPTKWIESQLQDIGIATKFIRAMQFRDTRNPMRIHEVEVVPKADGSHLKVLLLKSLGGQTVKVERKRVSKDPTQCHRCQCFGHTRNYCRNPFKCMKCGQPHATVSCTKPKNLPATCANCNGSHVSSYKGCPAFQEAKQRLSINKIQSLHSQPTHLQTPRNKHPYTKPT
D. simulans	TART	SFTTKSELGNNIRIQAKTMDAYNAIQNVLLEANIPLHSHQPKSAKGFQIVIRHLHQSTPTKWIESQLQDIGIATKFIRAMQFRDTRNPMRIHEVEVVPKADGSHLKVLLLTSLGGQTVKVERKRVSKDPTQCHRCQCFGHTRNYCRNPFKCMKCGQLHATVSCTKPKNLPATCANCNGSHVSSYKGCPAFQEAKQRLSINKIQSLHSQPTHLQTPRNKHPYTKPT
D. yakuba	TART	NFTTKSEPGSNIRIHAKTMEAYKAIQNVLQDENIPRHSHQPKGLKGFQIVIRHLHQSTPIKWIESQLQEIGIATKFIRAMQYRDTKNPMRIHEVELVPKADGSHLKVLQLNSLGGQTIKVERKRVSRDPIQCHRCQSFGHTKNYCRNPFKCMKCGQQHATVLCNKPKHIPAYCANCKGNHVSSYKGCPVFQEAKQRLAVNKVRDQHTQQTQHTQPTHPQTPRKEKPHLPPT
D. ananassae	TR2	TYTTTSLSGNRVKLTSNNFFTYQHILEKLETDKLQTHTHQPKSERGYRIIIRQLHHSTPCEDIRRLLSDLGYAPRYINNIKHRRSRKPMDLFEAELAPAQKDYNEKILAITKLGNQRVTIERQLRRLEPPMCHRCQRYGHTKNFCRRDFVCLKCAGNHPSTACAQTKLTNPKCANCGLGHVASYKGCAAFKQAQTRLTAYRAHKALGTHRAQQQPRKGPTTRPN
D. elegans	TR2	SLTCLKGNRIKLLCKDLLSYQQVLAKLEAEKCQTHTFQRRSERGYRVVIRQIHHSTPCDQIRRQLTGMGFSVRYISNIKHRRSRKPLDLFEVELAPAADHGNDKVLSITRLGNQVVKVERQLRRLEPAMCHRCQKYEHTKANCRRDFVCMKCAGSHATTDCSEVRVPNPKCANCGLGHVASYKGCVEYKKAQARLLAHRAHVAVDTVPQNNNMEHRRRETLRV
D. rhopaloa	TR2	PWHTPNWNKIKITCKDFISYQQILAKLEAEKCQSHTFQRPSERGYRVVIRHLHHSTPSDQIRRQLTELGLHVRYINNIKHRRSRKPLDIFEVELAPAADHANDKILSVNRLGNQIVKVERQLRRLEPAMCHRCQRFEHTKSNCRRDFVCMKCAGSHATTDCSEVRVSNPKCANCGLGHVASYKGCVEYKKAQARLTAYRAHIAVDKRPQTNTEHRQRQTHRN
D. ficusphila	TR2	SISCLSGNRIKILCKDYSSHKQILSVLQTDKWQSHTFQKRSERGYRFVIRQLHHSTPCEKIRDQLNYLGFSIRYLSNIKHRRSGKPLDMFEGELAPSLDHQNDRILKINSLLNQTVKIERQLRRIEPAMCHRCQKYGHTKNHCRREFACLKCAGNHATTNCSQTKIPNPKCANCGLGHIASYKGCIEYKKAEAHLLSYRTHMATKKRAGKQSNQKNIQPPPT
D. ficusphila	Jockey_2	FELKALSTNEIKIQPQESIHYTNILKLLKDKETKFYTYRPKDQRGFKVILRHVHHATEKNEIINELADLGHTVLNIHNIQRNDTKKPLPLFSIELKTQDNNKDIYKISHLLHCKVAFEPPHQKRIIPQCTNCQKYGHTRNYCTRDPICVKCAGKHQSANCQITNSDKSKCALCSENHTSNYKGCMVYKALQLKKYPSLRQKEIPQIQTPPEIATKSTINPKIIPT
D. rhopaloa	Jockey_2	NTLKRGNILEAKLQVNNEDNFRSVTRYLDNELINYYTYQLKSKKGLQVVLKGIESTVAVAEIAEGLTEKGFDVKHIVNIVNRDKIPQPLFKIELAPETKKNAHPIYNLQYLLHRRITVEEPHKRNGPVQCTNCQEFGHTRTYCTLRPVCVACGDLHCIEACLGNKEDPTKCSNCGGNHTANYRGCPVYKELKSRLNQRRSNPFAAQHSAQPNIFTPSTTTPGVPPI
D. elegans	Jockey_6	TILKRGNISETKLQITNEANYRSVTNFLDSERVNYYTYQLKSSKGLQVVIKGIESTVPAADIAEGLKENGFDVKNVMNITNRAKIPQPLFKIELKPDAKKNAHPIYKLQYLLHRRITVEEPHKRNGPVQCTNCQEFGHTKSYCTLRPVCVACGDLHCIEACTGNKEDPAKCSNCGGNHTANYRGCPVYKEIKSRLNQRRQQPTSAQQVAQPNLYIPSQTTPGVPPI
D. ficusphila	Jockey_4	TNLKRGNISETKLQIKNESNYRTVTNFLDHVPVNYYTYQLKSSKGLQVVVKGIESTVPVADIAEGLKEQGFDVKHVTNIINRAKIPQPLFKIELAPETKKNAHPIYKLQYLLHRRITVEEPHKRNGPVQCTNCQEFGHTRSYCTLRSVCVACGDLHCIDACLRNKEDPAKCSNCGGNHTANYRGCPIYKELKTRLTQRRSKPTTVQHVAQPNYFAPSVTTPGVQPI
D. ficusphila	Jockey_8	PETKNNEHPIYKLQYLLHRRITVDEPHKRNGPVQCMNCQEYGHTKTYCTLRAVCVACGDAHSTEACPINKDNHSKCSNCGGNHTANYRGCPVYKELKSRLGQHITAARNPVTRNSFISTTTIPGV
D. ficusphila	Jockey_1	VPLIKGNIHETKVQTKYEEHFRAVSKYLEETKKNFYTYQLKSSKGLQVVLKGIEPDVAPSEILEALKDKGFSAKNVSNIINKNKKPQPLFKVELEPDSKKNEHPIYKLQFLLHRRITVEEPHKRNGPVQCTNCQEFGHTRTYCTLRSVCVVCGDFHNSAHCPANKEDPHKCGNCGGNHTANYRGCLVYKELKSRMRQATATRQQNTQNVYFKSKTTPDVKPL
D. elegans	Jockey_2	IPLMKGNISETKLQTKTEDDFRAVSKYLNDAKKNYYTYQLKSCKGLQVVLKGIEPDVTPSEIIEALKENGFCAKNVINIMNKNKKPQPLFKVELEPDSKKNAHPIYKLQYLLHRRITVEEPHKRNGPVQCTNCQEYGHTRAYCTLRSVCVACGNCHGSEPCPANKGDSLKCVNCQGNHTANYRGCPVYKEMKSRMQRATTARQNIYMKSQTTPEVH
D. melanogaster	Jockey	YYIRISRFGVSRIYTANPDAFRTAVKELNKLNCQFWHHQLKEEKPYRVVLKGIHANVPSSQIEQAFSDHGYEVLNIEATKNFKTRQNLFYINLKQGPNVKESLKITRLGRYRVTVERATRRKELLQCQRCQIFGHSKNYCAQDPICGKCSGPHMTGLCSDVLCINCGGDHVSTDKSCVRAEKAKKLKPRSRLPMTNNIATLKPPQRSSSGYLRTNIIPT
D. rhopaloa	Jockey_4	TPLVKGNIHETKLQAKTEDQFRAVTIT
D. elegans	Jockey_5	IPLVKGSIHETKVQTKNEDNYRVLSKYLNDKKKNFYTYQLKSSKGLQVVLKGIESDVTPEEVKNALQDKGFNTKTVFNILNRDRKPQPLFKIELEPETNRNEHPIYKLQFLLHRRITVEQPHKRNGPVQCTNCQEYGHTKSYCTLRPVCVVCGDLHDSALCPASKNDSNKCGNCGGNHTANYRGCPIYKELKSRIHQRGTTARSHNAQLTASKSNPEVPPV
D. ficusphila	Jockey_7	IPLTKGEIHETKVQVKSEESFRKLTELLDAKKKNYYTYQLKSSKGQQVVIKGIEPDVSTAEVEQALKDKGFNVKTVINIRNRNKQPQPLFKVELAPDSKKNEHPIYNLQFLMHRRITVEEPHKRNGPVQCANCQEYGHTKSYCTLRSVCVACGGLHTSAKCELKNEPNKCSNCGGDHTANYRGCPVYKELKSRINQRVSTARSHHTPLIPSKLTPEVSPA
D. takahashii	Jockey_1	YSLKCHPNNSVSILAADSDAYRAITKSLTLKNVPFHSWQLKEXRSYRVVIRGIHHSVPDDNIRESLSLSGHTVRYINRPRSRFDKTRLNLVFIELEPAANNKEIHEIKTLCRQRVQVEIPYKKEDVVQCHRCQAFDHTKNNCHMGFNCVRCGLQHGLKDCLRDVHPVKCVNCGGDHTASYKGCAAYQKAASRRKSVTSYPQQSARSNGQSNFVASTPPL
D. ficusphila	Jockey_3	YSLKCHPNNSVSILASDSDTYRAITKSLTLKKVPYHSWQLKEDRSYRVVIRGVHHSVPDVDIKESLTSAGHLVRFVNRPRSRFDKTKLNLVFVELEPAANNKEIHGIKTLCRQRVQVELPYKKDDVVQCHRCQAFGHTKNHCQKLFNCVRCGLQHGLEACLKDVRPVKCANCGGGHTASYKGCVVYQQVAQRKRVTSQRRTIPQQFTDPNVWSNSAAPNPPL
D. ananassae	Jockey_6	YSLKCHPNNSVSILATDSDTYRAITKSLTLKKVPYHSWQLKEDRSYRVVIRGVHHSVPDVDIKESLTSAGHLVRFVNRPRSRFDKTKLNLVFVELEPAANNKEIHGIKTLCRQRVQVELPYKKNDVVQCHRCQAFGHTKNHCQKLSNCVRCGLQHGLEACLKDVNPVKCANCGGGHTASYKGCVIYQQVAQRKSATSQRRTVPQQFTDPYVWSNSAVPNPPP
D. rhopaloa	Jockey_6	YSLKCHPNNSVSIIAADSDAYRAITKSLTLKKVQSKYQKTLHCVRCGLQHGVEACLKDIHPVKCVNCGGNHTASYKGCVVYQQIANRRKNVTSHRSTVPKQLTPKNXRSNSANPIPPL
D. takahashii	Jockey_6	FRLKTTGRSSCRITVDDGSIYRVVQKLFKDNGIPYSTFQFKNERAFRIVIKGLNASTEVDEIIARLKELGHNPRNVYNPPGENGKAKRDIFFVELEPAKNNKDVYNIRVIDYQVVTIKPQIQRKGPLRCFKCQSFNHSKNFCMFSPKCARCAGDHDTKKCPALKEDQFKCINCGSNHSASSRSCPAYLEQCEKRKSNSTPERQRSQKQTVAAPIPSQNAWLRPPVPL
D. takahashii	Jockey_2	IRFKITGPATVRVSPFDGDTYKLVQQLLWSNNIPFNSWQLKSDRSFRIVVKGLHSSTDPEDIKADLGAAGHVVRNVYNPPGKNNGHRPNIFFVELESSTNNVKVYDIKSLAYQSITIVPPERRDEVVRCYXCQDFGHTKTYCFVPPKCAKCGGDHESRVCPATSQDQFKCINCGSNHSAGYRKCPAFLEAIARRKSGTIKKQPXXKFVPAPLPAQSAWALPSPKPM
D. biarmipes	Jockey_1	LFTTNVTNAARSANVYTANNHGRALIRHSNPTIAEILVRKRALRRRYIRTHSPEDKAQWHRCARELHVAMAELKNFTKKVKRMPQKVTPLKLKPGKPEQDRPISLLPSLSKERLIASRLIIHLEDNDTIPMHQFGDNKEYCNADDVCFLSSSNSETESANNIKINESKCVNVCFTTKAKYLGLTLDKRLTFREHIARVVKMCNLKRNQLFWMLNKKSKIAPTWIPIR

## Sheet: RT_Tree_Fig.1B
Table S2. List of consensus domains used for phylogenetic tree building in main text and supplement (by tab).
Species	TE-RT	Consensus_sequence
D. takahashii	TAHRE	SILRTGHFPGQWKHAMITMILKPGKTPTSVKSYRPISLLSGFSKLFERILMTRLFDVESFSRAIPHHQFGFRKEHGAEHQLARVTQFVLKAFEQGEVCSAIFLDITEAFDRVWHDGLKLKLSKLLPMSLFRIVESYLQDRSFTVKLNNTLSKTGKVTAGVPQGSNLGPILYSIYSSDMPQLIPTKYVFNVSWPEYHSKNSLLATYADDTVLLSCDKITKAAVDRNQRFVDLYCKWAKKWDIAIN
D. elegans	TAHRE	RILQTGHFPSQWKHATITMILKPKKSPSCASSYRPISLLPCFSKILEKILMVRLFETESFAKAIPHHQFGFRKEHSAEHQLSRVTQFILKAFEEKEVCSATFVDVSEAFDRVWHDGLLVKLAKLLPTCMFNVLENYLLNRTFSVKLGGTTSKTCKITAGVPQGGNLAPILFSVFTSDMPLPIPINPSYERSFPNYFPKNMLLATYADDTVILSSASTANTATELSNTYLSKYCSWAKHWDISINAKKTGHILFSLRGKENPYTTPLVDGQRTKKQNKQCYLGVILDKKLTLKPHILQLRAKIFSSYKKLEWLLGKKSKLPDNTKTLLFKQIISPIWHYSIAVWGSLISETSAKQIQTVENKLIRKSIGASRYTKQSTI
D. melanogaster	TAHRE	NILRTGYFPNAWKHASVKMIPKPGKSPFALNSYRPISLLSGLSKLLERLLLKRLFDVDSFAKAIPSHQFGFRKEHGTEQQIARVTQFILEAFEEKEVCSAVFLDITEAFDRVWHEGLLYKLAKLIPRYLFDILESYLTNRTFSVKIDETTSRIGNIRAGVPQGSILGPLLYSIFSSDMPYPIIKDYMRNISFPDYHPTNIILSTYADDTIVLSRSKYTKLAINLNQNYLNVFCRWAKKWDISVNAKKTGHVLFSLKKDQTNIYTPPLINGQRAAKLNKQRYLGVMLDRKLTFCAHVTLLKGKTIAAYKKLEWLLGKRSHLPKNAKILIWKQILSPIWHYAIAIWGSLVSDTQARKIQTMENKYIRRIINASRYTRQADI
D. simulans	TAHRE	NILKTGHFPNKWKHASISMIPKPGKSPFALNSYRPISLLSGLSKLLERILLKRLYDIDYFAKAIPSHQFGFRKDHGTEHQLARVTQFILKAFEEKDVCSATFLDITEAFDRVWHDGLLYKLSRLIPRYLFDLLENYLSNRTFSVRIDETTSRIGKIRAGVPQGSILGPVLYSIYSSDMPYPIVKDYMRHISFPDYNQTNTILATYADDTIILSRSKYTNLAINLNQNYLNVFCRWSKKWDIAINAKKTGHILFSLKREETNAYTPPTINGQRAAKLNKQRYLGLMLDRKLTFGAHITLLKGKTIAAYKKLEWLVGKNSHLPKNAKILLWKQIVSPIWHYAIAIWGSLVSDTQANKIQTMENKYIRRIINASRYTRQATI
D. sechellia	TAHRE	ILKIGHFPNKWKHASISMIPKPGKSPFALNSYRPISLLSGLSKLLERILLKRLYDIDYFAKAIPSHQFGFRKDHGTEHQLARVTQFILKAFEEKDVCSATFLDITEAFDRVWHDGLLYKLSRLIPRYLFDLLENYLSNRTFSVRIDETTSRIGKIRAGVPQGSILGPVLYSIYSSDMPYPIVKDYMRHISFPDYNQTNTILATYADDTIILSRSKYTNIAINLNQNYLNVFCRWSKKWDIAINAKKTGHILFSLKREETNTYTPPTINGQRAAKLNKQRYLGLMLDRKLTFGAHITLLKGKTIAAYKKLEWLVGKNSHLPKNAKVLLWKQIVSPIWHYAIAIWGSLVSDTQANKIQTMENKFIRRIINASRYTRQATI
D. yakuba	TAHRE	KILNTGHFPKKWKHACITMILKPGKSPSLLNSYRPISLLSGLSKIFERIILNRLYNIESFSKAIPNHQFGFRKGHGAEHQLARVTQFILKAYEDKEVCSATFLDITEAFDRVWHDGLLLKLTKLIPKQLFNVLESYLTGRTFQVRINETCSRIGTINAGVPQGSILGPVLYSIYTSDMPFPIIKGYIRNISLPDYHPKNIILATYADDTIIISRSNNTRSAININQTYINKFCRWAKKWDIAINGKKTGHVLFSLKNISENVHTTPIVDGQRAIKLCKHRYLGVMLDRRLTFGAHLILLKGKIIAAYKRLEWLLGKNSHLPKRTKLLLWKQIISPIWHYAIAIWGSLTSATQTKKIQTLENKLIRRIIKANRYTKQSAI
D. rhopaloa	TARTAHRE	SILRLGHYPSQWKHAAISLILKPGKDSSELSSYRPISLLSGLSKMFEKMLLRRLFEFPLFAKAIPSHQFGFRKQHGTEQQLARVTNFILEAYENQQYCSAVFIDITEAFDKVWHAGLFCKLSKILPNKMYRVLESYLSNRTFEVNSTGSKSRQGRINAGVPQGSNLGPVLYSIYSSDMPTPEITKTGNAMEFRAPRVKNMMLATYADDTIILCRGEHQAWTIRDNEEFLWYFSKWAKKWAITVNTSKTAHVMFALKNLSHARGPIQIKFDNNIIPLSNKQTYLGVALDRKLNLLSHVNLLRGKIRTTEKRLEWILGKNSSLQKECKILLVKQLITPIWQYAIPIWGALVSDSSMQRIQTAENKVIRKAVGATRYTRNDT
D. melanogaster	TART	SILRIGYYPDAWCHAQVKMILHPGKSSYSPKSFKPISLLSGLSKMFERLLLKRLFRVDLFKKAIPLHQFGFRKEHGTEQQIARVTQFILEAFERKEYCSAVFLDISEAFDRVWHEGLLLKLAKILPYNLYIILESYLTNRTFEVKDQGETSRTGQIGAGVPQGSNLGPLLYSIFSSDMPLPYIYRPSPTERIMLSTYADDTIVLSSDTLATAATRNNENYLKTFSDWADKWGISVNAAKTGHVIFTLKNDLPTNSNNVKIKGQRDVKENKQSYLGLELDSKLTLSXHVTKLXGKYSTAYRKXDWILNNRSKLPTXTKMLILKSVLSPIWQYAIAAWGPLVTDAQIRRVQVEENRKIRDICRTTEYTDNETI
D. sechellia	TART	SILRIGYYPDAWKHAQVKMILKPGKSVNDPKSYRPISLLSGLSKIFERLLLKRLFRVDLFKKAIPLHQFGFRKEHGTEQQIARVTQFILEAFERKEYCSAVFLDISEAFDRVWHEGLLLKLAKILPYNLYIILESYLTNRTFEVKDQGETSRTGQIGAGVPQGSNLGPLLYSIFSSDMPLPYIHRPSPTERIMLSTYADDTIVLSSDILPTAATRNNENYLRTFSDWADKWGISVNASKTGHVIYTLKNDIPTNLKTMKIKGQAVKKESKQSYLGVILDSKLTLSPHVTKVVGKYLTAYRKMSWILNERSKLPTNTKMLILKSVLSPIWQYAIAAWGPLVTDAQIRRLQVEENKKMRDIFRAGRYTKNQTI
D. simulans	TART	SILRLGYYPEAWKHAQVKMILKPGKSTNEPKSYRPISLLSGLSKIFERLLLKRLFKVDLFKKAIPLHQFGFRKEHGTEQQIARVTQFILEAFEKKEYCSAVFLDITEAFDRVWHEGLLLKLAKILPYNLYIILESYLTNRTFEVKDQGETSRTGQIGAGVPQGSNLGPLLYSIFSSDMPLPYIHSPSPTERIMLSTYADDTIVLSSDILPTAATRNNENYLKTFSDWADRWGISVNASKTGHVIYTLKNDIPTNLKTMKIKGQAVKKESKQSYLGVILDSKLTLSPHVTKVVGKYLTAYRKMSWILNERSKLPANTKMLILKSVLSPIWQYAIAAWGPLVTDAQIRRIQVEENKKMRDICRAGRYTKNQTI
D. yakuba	TART	SILRIGHYPDNWKHATVKMILKPGKSANDPKSYRPISLLSGFSKIFERLLLKRLVRIDSFKKAIPLHQFGFRKDHGAEQQIARVTQFILEAYERKEYCSAVFLDITEAFDRVWHEGLLLKLAKILPFNLYTILESYLTNRTFEVKDPGEPSRTGQIGAGVPQGSNLGPILYSIFSSDMPIPRTHSVSPTGEMLLSTYADDTVVLSTDQLPTAAIRNNQNYLETFSDWADKWGIKVNAAKTGHVIYTLKNDLPTNLKTIKIRGNKIKNQNKQSYLGVILDNKLTLSSHVTKLVGKFTAAHKKLTWILSERSKLPDNTKMLIFKTILSPIWQYAIPAWGPLVTDAQIKRIQVEENLKMRKVCRAGRFTRNQFI
D. ananassae	TR2	CMLRYSYFPKQWKRAAITMIKKPGKTPHEVSSYRPISLLPGFSKIFETLLMHRMFKIQDFERAIPSHQFGFRKQHSTEQQLLRVTQHILSAYEQKMYCSAVFIDVSEAFDRVWHDGLLLKLAKLLPHSLYKILQSYLTDRSFTMNSTGIPSRTGKISAGVPQGSVLGPILYTVFTSDMPLPEVISSQHTYNPSYFENMMLSTYADDTIILCTKREPQLAIQTTESFLKYITDWATSWCITLNPNKTIHVLFTKRSVANLTGNKSPKMKGILIKNEPKHRYLGLILDRKLLLHHHINQLQNRIRNVAAGLNWIIGTKSKLSPQSKILLYKQIIAPIWQYALPLWGALTSNTQFQRIEAAQSKLIRKILKAGRYTRNQVL
D. elegans	TR2	SILRYGHFPEQWKCAAISMIRKPGKNPHEVSSFRPISLLAGFSKIFETLLMDRMFACKDFELAVPMHQFGFRKEHNTEQQLRRVTQYILTAYEKKMFCSGVFIDVSEAFDRVWHDGLLLKLAKLLPFCLYRVLESYLTDRTFYVNGNGITSRKGKIGAGVPQGSVLGPVLYTIFTSDMPLPTIAGQQHTHTSDLFNNILLSTYADDTIILCASKEAHSAINTNQKYLSLITKWASQWCITLNANKTVHVLFSRRSTTSLLGPKSPCMNGVEIKNETKYRYLGLLLDRKLILHLHTTQLINRLRSTAFGLNWILGNQSKLPTSSKITLYKQLIAPVWQYALPIWGSLISNTRFKQIEATQNKIIRRIVNASRYIRNQDI
D. rhopaloa	TR2	CILRYGHFPSKWKCAYISMIKKPGKSHHEVDSYRPISLLAGFSKIFEVLLMKRMFRCKDFEDAVPAHQFGFRRGHSTEQQLFRVTQFIQNAFKQKLHCSAVFIDVSEAFDRVWHQGLLLKLAKLLPYCLLKTLDSYLTNRTFIVNGYGHQSRIGTIAAGVPQGSVLGPILYTIYTADMPLPSSVERTLFKEQVDHKFMLLSTYADDTIIMCADKAAHIAINTNTTYLYEITEWASDWGITLNANKTVHVMFSNRTVSVSRGPKAPLIHGKIIQSHFKHRYLGLLLDKRLKLNHHTTQLANRVRASAYGLNWILGKQSKLPAASKALLYKQMIAPIWHYALPVWGPLVSKTQFKKIEVSQNKILRWVVQAGRYTRNKVI
D. ficusphila	TR2	CILRHGHFPQQWKQAAITMIKKPGKSHYEAGSYRPISLLAGFSKIFESLLMKRLFKCDDFEKAIPYHQFGFRKDHNTEQQLFRATQYILNSLQNKMYCSAVFIDVSEAFDRVWHEGLLLKLAKLLPFPLYKVLESYLSDRTFIVNGPGTTSRLGKITAGVPQGSVLGPILYTIYTSDIPLPRIIGPEYSYNSEPFENMLLSTYADDTIIMCANRYGHIAIDTNTKYLKAVTNWAKDWGVTLNGSKTVHVMFSRRSAASIYGPKSPKIYGNLIKTEPRHRYLGLLLDSKLHLHLHTTQLVNRVRATITRLKWILGNQSKLSTESKVLLYKQISLCGNIQSQSGAPWSQTPNLK
D. ficusphila	Jockey_2	AVIRLKFFPSTWKIAQITAIPKPHKSAALVSSYRPISLLPILSKIFEKILLDRINPILIEQNVIPPHQFGFRKKHSTVQQVHRVINKISEDFDNKKVCVAVYMDIAKAFDKVWHTGLLHKLHNILPLNLFTILKSYLTNRYFYIKCDDECSDLMPVAAGVPQGSVLGPILYLIYTADIPNPLTHGSMIATFADDTVLMASSYTEKRAANTLQEILTTTMSWFEKWGIEINKDKTQQVVYTKKKITTPTRIKIDDEILKLSTSAKYLGLTIDSKLTWKKHIINKRNEVKSKFRQLHWLLGRQSNLNVSNKLLIYKTIIRPIWTYGIEIWGTASKSNLIIIQRAQSKILRIITNSDRYTTNDHI
D. rhopaloa	Jockey_2	SILKWGYFPDQWKKSVITMIPKPGKDKSQPSSYRPISLLPCLSKLFEKLLLVHLVTHLQNNRTIPLHQFGFREKHGTIEQVNRLTSEIRTAFEHKQYCSALFLDVSQAFDRVWIDGLVYKIKTLLPENTHKLLESYLRNRVFTVRCKTFTSTIRNIEAGVPQGSVLGPILYILYTADIPTSRQTLISTFADDTAIVSRSKCPKTATAHLKEHLVAVEKWLADWRIKVNEQKCKHITFTLNLSKCPPLALNNKPVPQADEVTYLGIHLDRRLTWRKHIEAKKTHLKLKASSLHWLMNYRSPLPLEYKVLLYNSCLKPIWTYGSELWGNASSSNIEIIQRVQSKTLRTITGAPWYIRNANI
D. elegans	Jockey_6	SILKWGYFPTQWKKSVITMIPKPGKDKSQPSSYRPISLLPCLSKLFEKLLLCHLRTHLQNDRAIPLHQFGFREKHGTTEQVNRITAEIRTAFECREYCSALFLDVSQAFDRVWIDGLVHKIKTVLPQNTHKLLESYLKDRVFTVRCKXFFSANHKIEAGVPQGSVLGPILYVLYTADIPTSSQTTLSTFADDTAITSRSKCPKTATAYLKNHLGAVEKWLADWRIQVNEQKCKHITFTLNRATCPPLALNNKQIPQVDEVTYLGIHLDRRLTWRKHIEAKKISLKLKANSFHWLINSRSPLPLELKVVIYNSCLKPTWMYGSELWGNASSSNIEIIQRIQSKILRTITGAPWYIRNANI
D. ficusphila	Jockey_4	SILKWGYFPLQWKKSVITMIPKPGKDKSQPSSYRPISLLPCLSKLFEKLLSCHLRTHLQNNRAIPLHQFGFREKHGTIEQVNRITAEIRTAFEYREYCSAIFLDVSQAFDRVWIEGLVYKIKTVLPQNTHKLLESYLKDRVFTVRCKNFFSENHKIKAGVPQGSVLGPILYVLYTADIPTSSQTILSTFADDTAIISRSKYPKTATAHLKNHLTDVEKWFADWRIQVNDQKCKHITFTLNRETCPPLSLNNKQIPQVNEVTYLGIHLDRRLTWRRHIEAKKTSLKLKANSFHWLINPRSPLPLEYKVLLYNSCLKPTWTYGSELWGNASSSNIEIIQRVQSKILRTITGAPWYIRNANI
D. ficusphila	Jockey_8	SMMKWGYYPQQWKKSVITMIHKAGKDKSQPSSYRPISLLPCLSKIFEKLLLNRIKXHLQSHNAIPSHQFGFREKHGTIEQVNRITAEIRNTFESREYCSAVFLDVAQAFDRVWLDGLIYKIQNLLPQNTHKILESYLVHRSFAVRCKVKLSDYHPIEAGVPQGSVLGPTLYIIYTADLPTTGLTITSTFADDTAILSRSKCPMRATQNLSAHLGLLEKWLADWRIKVNEQKCKHVTFTLNRQTCPPPSLNNIHIPQTTEVTYLGVHLDRRLTWRRHIEAKRTQLKLKARSLHWLINARSPLKLEYKVLLYNVVLKPIWKYGSELWGNACVSNLEVIQRAQSKILRTITGA
D. ficusphila	Jockey_1	GIISLGYYPKKWKKSIIIMIPKPGKDHTIPSSYRPISLLSCLSKLFEKCLLTRILPYMGAHNIIPAHQFGFREKHGTIEQVNRITSEIRTAFEHREYCSAIFLDVSQAFDRVWLNGLMHKIKTHFPGYTHKLLESYLYNRVFAVRCNTTTSENYKIEAGVPQGSALGPTLFVLYTADIPTSDRLLTSTFADDTAILSRSRCPVRATSQLANHLTVVEKWLSDWRIKINEQKCKHVTFTLNRQTCPPIYLNSTQIPQVNEVTYLGVHLDRRLTWRRHIECKKLHLKLKASSLHWIINARSPMCLDYKVLLYNSTLKPIWTYGSQLWGNASKTNIDIIQRAQAKILRTITGAPWYIRNENI
D. elegans	Jockey_2	GITRLGYFPKKWKKSVIIMIPKPGKDHTIPASYRPISLLSCLSKLLEKCLLTRIIPYLKEHNVIPAHQFGFRESHGTIEQVNRLTTEIRTAFEFREYCSAVFLDVAQAFDRVWLDGLMHKIRTLLPENTHRILESYLYNRAFAVRCNTTISDDYTIEAGVPQGSALGPTLFLLYTADIPTNERLTTSTFADDTAILSRSKCPIQATALLADHLVVVERWLSDWRIKINAQKCKHITFTLNRQTCPPLTLNNTPLPQADDVTYLGVHLDRRLTWRRHIEAKKIHLKLKSNSLHWLINARSPLCPDFKVLLYNSTLKPVWTYGSQLWGNASSSNIDIIQRAQSKILRTITGAPWYVRNDNI
D. melanogaster	Jockey	SVLDVGYFPKAWKSASIIMIHKTGKTPTDVDSYRPTSLLPSLGKIMERLILNRLLTCKDVTKAIPKFQFGFRLQHGTPEQLHRVVNFALEAMENKEYAVGAFLDIQQAFDRVWHPGLLYKAKRLFPPQLYLVVKSFLEERTFHVSVDGYKSSIKPIAAGVPQGSVLGPTLYSVFASDMPTHTPVTEVDEEDVLIATYADDTAVLTKSKSILAATSGLQEYLDAFQQWAENWNVRINAEKCANVTFANRTGSCPGVSLNGRLIRHHQAYKYLGITLDRKLTFSRHITNIQQAFRTKVARMSWLIAPRNKLSLGCKVNIYKSILAPCLFYGLQVYGIAAKSHLNKIRILQAKTLRRISGAPWYMRTRDI
D. rhopaloa	Jockey_4	GITKLGYYPKKWKKSVVIMIPKPGKDHTIPSSYRPISLLSCLSKLLEKCLLTRITPYLREQNLIPAHQFGFRESHGTIEQVNRITSEIRTAFEHREYCSAIFLDVSQAFDRVWLEGLMHKIITLLPENTHKLLKSYLYHRVFEVRCNTTTSNEYNIEAGVPQGSALGPTLFVLYTADIPTNERLTTSTFADDTAILSRSRCPTRATAQLADHLVVVEKWLSDWRIKINEQKCKHITFTLNRQSCPPLTLNSTQIPQASDVTYLGVHLDRRLTWRRHIECKKVHLRLKASSLHWIINSRSPLCLDFKVLLYNSTLKPIWTYGSQLWGNASNSNVDIIQRSQSKILRTITGAPWYVRNENI
D. elegans	Jockey_5	AIAKHGHFPKRWKKSIIIMISKPGKDPTIPTSYRPISLLSCLSKLFEKCILTRINTYLRIQNGIPSHQFGFREKHGTIEQVNRITSEIRNAFEKREYCTAIFLDVSQAFDRVWLEGLMYKIKTMLPSNTHKLLESYLHDRKFAVRCNTAISDDFSILAGVPQGSVLGPTLYVLYTADIPTSSRLTTSTFADDTAILSRSKCPIQATAQLALHLADVEKWLSDWRIKVNEQKCKHVTFTLNRQNCPPLTLNNTLLPQSNEVTYLGVHLDRRLTWRRHIEAKRTHLKLKASSLHWLINARSSLSLDYKVLLYNSVLKPIWTYGSQLWGYASNSNIDIIQRAQSKILRTITGAPWYVRNENI
D. ficusphila	Jockey_7	AMTRLGCFPKRWKKSIIIMIPKPGKDHTLASSYRPISLLSCLSKLFEKCLLTRIIPYFRRHNIIPAHQFGFREKHGTIEQVNRITSEIRSAFENREYCTAVFLDVSQAFDRVWLDGLMHKIKIMLPNSTHKLLKSYLYNRIFVVRCNTSISAERNIEAGVPQGSVLGPTLYLLYTSDIPTSSQLTMSTFADDTAILSRSRCPQQASAQLAAHLEVVEKWLSDWRIKVNEQKCKQVTFTLNRRNCPNLTLNNIVLPQSDDVTYLGVHLDRRLTWRTHIEAKRTHLRLKANSLHWLINSRSPLSLDYKVLIYNTVLKPIWTYGSQLWGSASNSNVEIVQRAQAKILRIITGAPWYVRSVNI
D. takahashii	Jockey_1	SMLRIHHFPSQWKCAVITMIPKPGKPENLVESYRPISLLPTFSKIFERIILSRILGVRSVQDAIPDHQFGFRNHHGTPEQAHRLVQHILNAFENKQYSSAIFLDVKEAFDRVWHEGLLHKLKTLLPTGLFLVLKSYLLDRSFMVEVRGERSSLRFSRAGVPQGSVLGPVLYTLFTSDLPSINAPDTLLATYADDTAFLVNSTCRIEASRITQEFLDSYGKWTNRWNIAINGRKSQHCNFTLRGQILPTVELHSTTIPQSPQAQYLGLILDKRLTWKQHTTKIAATCRAKLRKLNWMLKSTSKLSLANKVLLFKTIVVPSMTYCIQLWGVASDSNVMKVQRVQNKALRTITNAPWYVRNVDL
D. ficusphila	Jockey_3	SMLRIQHFPSQWKCAVITMIPKPGKPENLVESYRPISLLPTFSKIFERIFLSRIMGVRSVQAAIPDHQFGFRHRHGTPEQAHRVVNHILNAFENKQYCSAIFLDVKEAFDRVWHYGLLHKLKSLLPTGQFLLLKSYLLDRSFMVEVRGERSSIRFARAGVPQGSVLGPVLYTLFTSDLPSSVEPGTLLATYADDTAFLVNSSCRIEASRITQEFLDSYGKWANRWNIAINGRKSQHCNFTLRGKVLPRVELHDVTIPQSPQAQYLGLILEKRLTWKEHTKKITATCRSKLRKLNWLLKPTSKLSLGNKVLLYKSIVMPSITYCIQIWGMASDTNVMKVQRTQNRALRMMANAPWYVRNDAL
D. ananassae	Jockey_6	XMLRIHHFPSQWKCAVITMIPKPGKPENLVESYRPISLLPTFSKIFERIFLSRIMGVRSVQVAIPDHQFGFRHRHGTPEQAHRVVNHILKAFENKQYCSAIFLDVKEAFDRVWHLGLLHKLKSLLPTGQFLLLKSYLLDRSFMVEVRGERSSIRLARAGVPQGSVLGPVLYTLFTSDLPSLVEPGTLLATYADDTAVLVNSSCRVEASRITQEFLDSYGKWANRWNIAINSRKSQHCSFTLRAKTLPRVELHDVTIPQSPQAQYLGLILDKRLTWKEQTKKITATCRSKLRKLNWLLKPTSKLSLGNKVLLYKSIVLPSIIYCIQIWGMASDTNVMKVQRTQNRALRMMANAPWYVRNDAL
D. rhopaloa	Jockey_6	SMLRIHHFPSQWKCAVITMIPKPGKPENLVESYRPISLLPTFSKIFERIFLSRIMGVRSVQDAIPDHQFGFRHHHGTPEQAHRVVQHILNAFENKQYSSAIFLDVKEAFDRVWHAGLLHKLKSLLPTGQFLLLKSYLLDRSFMVEVRGERSSIRTARAGVPQGSVLGPIMYTLYTSDLPCPTQPGTLLATYADDTAFLVNSSCRVEASRITQDFLDLYGKWTNRWNIAINGRKSQHCNFTLRGKVLPRVELHHITIPQSPQAQYLGLILDKRLTWKGHIQKIAATCRTKLRKLNWMLKPTSKLSLGNKVLLYKSIVVPSMTYCIQLWGMASDSNVAKVQRVQNRALRRIANAPWYIRNDAL
D. takahashii	Jockey_6	ASLNLGHFPSPWKSALVTMVPKKGKDPCSPESYRPISLLSTFSKIFERIVLNRLLDIDTFNDALPNHQFGFRSRHSAVEQVHRVVNHILDALEGHKYCSAVFLDVRQAFDRVWHEGLFYKLMPLLPEGLWKLIVSFLDHRMFAVDIRGHLSGLRLIRAGVPQGSVLGPVLYTIYTSDLPNPVVRGTLLATYADDTAFLATGSTPSSASWRVQTFLNEFECWASRWNIALNVDKTQHATFALRPGRSRSLYLDGDRLKHEQRVTYLGVTLDRRLCWKGQIDRVCGSARTKLDKMDWLLRSDSGLSLQAKVRLFKAIVLPTLNWGITCWGTACDTSLRRVQTCITKALRRMLGVKWHHYVENSVL
D. takahashii	Jockey_2	AMIVLSYYPEQWKHANVVMIPKKGVXPRCADSFRPISLLPTFSKIFERILLKRLFSVHMFQDAIPNHQFGFRSLHNAAEQMHRVVNHILKAFEAKKYCCAVFLDVKQAFDRVWHCGLLYKLKPILPPTYFDLLRSFLIGRTFQVDVRGSKSASRPILAGVPQGSVLGPVLYTIFTSDLPSPRGRNVLTATYADDTAFLATSALRREATDMVQDMLNEFEAWASRWNIAVNPAKSQHATFSLNRLNTYRLTLDGTPIKHSDTVKYLGLTLDRRLTWKQHIVATCASVRQKAGKMRWLLRPGSGLSITAKTRLFKATLMPSLHWGIHFWGTACNTSIKRIESCQSKILRHMINAPYYTRNTTI

## Sheet: Gag_Tree_Fig.S3
Table S2. List of consensus domains used for phylogenetic tree building in main text and supplement (by tab).
Species	Reference_name	Gag	Source (P,C =Published, our Consensus)	Consensus_sequence
D. ananassae	Dana\HTR2A	HTR2A	P	TYTTTSLSGNKLTSNNFFTYQHILEKLETDKLQTHTHQPKSERGYRIIIRQLHHSTPCEDIRRLLSDLGYAPRYINNIKHRRSRKPMDLFEAELAPAQKDYNEKILAITKLGNQRVTIERQLRRLEPPMCHRCQRYGHTKNFCRRDFVCLKCAGNHPSTACAQTKLTPKCANCGLGHVASYKGCAAFKQAQTRLTAYRAH
D. ananassae	Dana_TR2	TR2	C	TYTTTSLSGNRVKLTSNNFFTYQHILEKLETDKLQTHTHQPKSERGYRIIIRQLHHSTPCEDIRRLLSDLGYAPRYINNIKHRRSRKPMDLFEAELAPAQKDYNEKILAITKLGNQRVTIERQLRRLEPPMCHRCQRYGHTKNFCRRDFVCLKCAGNHPSTACAQTKLTNPKCANCGLGHVASYKGCAAFKQAQTRLTAYRAH
D. elegans	Dele_Tr2	TR2	C	SLTCLKGNRIKLLCKDLLSYQQVLAKLEAEKCQTHTFQRRSERGYRVVIRQIHHSTPCDQIRRQLTGMGFSVRYISNIKHRRSRKPLDLFEVELAPAADHGNDKVLSITRLGNQVVKVERQLRRLEPAMCHRCQKYEHTKANCRRDFVCMKCAGSHATTDCSEVRVPNPKCANCGLGHVASYKGCVEYKKAQARLLAHRAH
D. rhopaloa	Drho_TR2	TR2	C	PWHTPNWNKIKITCKDFISYQQILAKLEAEKCQSHTFQRPSERGYRVVIRHLHHSTPSDQIRRQLTELGLHVRYINNIKHRRSRKPLDIFEVELAPAADHANDKILSVNRLGNQIVKVERQLRRLEPAMCHRCQRFEHTKSNCRRDFVCMKCAGSHATTDCSEVRVSNPKCANCGLGHVASYKGCVEYKKAQARLTAYRAH
D. ficusphila	Dfic_TR2	TR2	C	SISCLSGNRIKILCKDYSSHKQILSVLQTDKWQSHTFQKRSERGYRFVIRQLHHSTPCEKIRDQLNYLGFSIRYLSNIKHRRSGKPLDMFEGELAPSLDHQNDRILKINSLLNQTVKIERQLRRIEPAMCHRCQKYGHTKNHCRREFACLKCAGNHATTNCSQTKIPNPKCANCGLGHIASYKGCIEYKKAEAHLLSYRTH
D. persimilis	Dper\TR2A	TR2A	P	KFTTTSVRGNKLDCGDMETYNRVMAKLDADNINMHTHQLRKERGYRIILRNLHHSTPCDWIRKLIGEMGLSVRYVNVIKHRRSRKPLNMFEVELEPTLDNGNDKILSLTTMGNQEISVERQMRRIDPVQCHRCQCFGHSKNYCRRAFVCQKCAGAHPSTACAEAKIPPKCANCGEGHVASYRGCKA
D. pseudoobscura	Dpse\TR2A	TR2A	P	KFTTTSVRGNKLDCGDMETYNRVMAKLDADNINMHTHQLRKERGYRIILRNLHHSTPCDWIRKLIGEMGLSVRYVNVIKHRRSRKPLNMFEVELEPTLDNGNDKILSLTTMGNQEISVERQMRRIDPVQCHRCQCFGHSKNYCRRAFVCQKCAGAHPSTACAEAKIPPKCANCGEGHVASYRGCKA
D. grimshawi	Dgri\HTR2B	HTR2B	P	SFTTKCTQGNRILCDNVETYKTILKTLDDDNTQLYTHQLKSKRGYRVIIRNLHHSTSVEWLKSQLSELGYTVKYATPVKHRFTGNTLNMFEVEIAPLPEQEYKNITKLTRIGCQQVVVEEHVRRLDPVQCHRCQAFGHSKNYCRRPFVCLKCAGNHMTTVCEKQRDTAACANCKGKHVASYKGCPV
D. grimshawi	Dgri\TR2A	TR2A	P	SFTTKCSQGDRVLCKNLDTYKAVLAALNEDETHLHTHQLRMERGYRVVIRHLHHTTSHEWVKDKLGQLGFAARYVAVIKHRFTAKPMNLFEVELEPRLDGSNEKILSLTVLGNQQVTVDRQQRRIDPVQCHRCQAFGHSKNYCRRPFLCLKCAGGHATTTCSKGKEIATCANCKGSHVASYKGCPV
D. mojavensis	Dmoj\HTR2A	HTR2A	P	SYTTKVAQDNRIQCENISTYNAISALLQDKQIHNHTYQLRKDRGYRIIIRHLHYSTPYDWIRDQLKELGYVTRHVSVIKHRTRNEPMNIFEVELEPRLDGGHEKILTLTELGHQNIAVEKQLRRIDPLQCHRCQSFGHSKNYCRRPFVCLKCAGPHATTTCAKTIDAAKCANCGGKHVASYKGCPA
D. virilis	Dvir\TR2C	TR2C	P	KFTTKCTQGDRVQCKDFSTYNAILGLLNTENIPMHTHQPRSERGYRVILKHLHSSTPCDWLRTQLGELGYVVRYVNVMKHRFSGKPLNIFEIEIEPRVDGSHTKICKLNELGNQHVAVERQHKSADPVQCHRCQAFGHSKNYCRRPFVCLKCAGEHPTTMCAKDRDTAKCANCGEGHIASYKGCAV
D. grimshawi	Dgri\HTR3A	HTR3A	P	KFTTKCSKFNKFICEDLNTYRALLSALKNDDTDLHTHQLRSDRGYRVVIRQLHHSTPTEWINNTLRSLGFGVRNVNVIKHNRTLQPMNIFAVELQPTIDNFNDTILSLTLLGNQRVVVERQLRRQDPAQCHRCQLFGHTKNYCRRPFICMKCAGAHPSTACSATRIAPKCANCGGSHVSCYKGCPK
D. mojavensis	Dmoj\HTR3B	HTR3B	P	RFVTSAATSSTIHCDDMATHKAIIDVLAAENVQMHTHQSRNQRGYRVVIKKLHHSIPCDWLRAKLSELGFVVRFVRTMKHRFTGTPLNVFEVELQTMPDGSHLKICDLDMISNQMVQVERQAKPIDPAQCHRCQAFGHTKNYCRRPFRCMKCAGPHPSTECTKARDAAKCHNCGGEHVSCYKGCPK
D. mojavensis	Dmoj\HTR3C	HTR3C	P	SFRRSVSQSSTIYSDDMATHRAIVDFLTAENVQMYTHQSHHQKGYRVVIKKLHHSTPCAWLRVKLSELGFVVRFIRAIVRRFTGMPLNVFEVELQPMPDGSHLKICELDTISNQQVLVERQAKAIDPAQCHRCQAFGHTKNYCRRPYRCMKCAGSHASTECTKARDAAKCFNCGGAHVCCNKGCPK
D. persimilis	Dper\HTR3A	HTR3A	P	KFTTKSMANSRVHCDDMTTYNAIQNALAEDSTQLHTHQPRSERGYRVIVRHLHHTTPSSWITEELERLGYTTRFIRGLKHRFNGRPLNIFEVEIQPKADGGHEAILDIKNLANQCVSIVRQAKPRDPAQCHRCQEFGHTKNYCRRPYKCMKCAGDHPTTACRKPRQEPKCANCSGKHVSCYKGCPA
D. persimilis	Dper\TR3A	TR3A	P	KFTTKSMANSRVHCDDIITYNAIQNALAEDSTQLHTHQPRSERGYRVIVRHLHHTTPSSWISEELERLGFTARFIRGLKHRYNGRPLNIFEVEIQPKADGGHEAILDIKNLANQCVSIVRQAKPRDPAQCHRCQEFGHTKNYCRRPYKCMKCAGDHPTTACRKPRQEPKCANCSGKHVSCYKGCPA
D. pseudoobscura	Dpse\HTR3A	HTR3A	P	KFTTKTMTNSRVHCGDMTTYNAIQDALAEDSTQLHTHQPRSERGYRVIVRHLHHTTPSSWISEELERLGYTARFIRGLKHRFNGRPLNIFEVEIQPKADGGHEAILEIKQLANQCVSIVRQAKPRDPAQCHRCQEFGHTKNYCRRPYKCMKCAGDHPTTACRKPRQEPKCVNCSGKHVSCYKGCPA
D. pseudoobscura	Dpse\TR3A	TR3A	P	KFTTKSMTNSRVHCGDMTTYNAIQNALAEDSTQLHTHQPRCERGYRVIVRHLHHTTPSSWISEELERLGYTARFIRGLKHRFNGRPLNIFEVEIQPKADGGHEAILDVKQLANQCVSIVRQAKPRDPAQCHRCQEFGHTKNYCRRPYKCMKCAGDHPTTACRKPRQEPKCANCSGKHVSCYKGCPA
D. mojavensis	Dmoj\TR3A	TR3A	P	RFRTKATPSNRIQCEDIESYNAARSTLEEDGTHLYTHQLPSQKGLRIVVKNIHHSTPCEWIKNILSEKGYVVRHIRCARQRFTGKPLNLFEVEIQPTADGSHLNILSLKELSNQAVRIERQAKPVDPPQCHRCQAYGHTKNYCRRPFKCMKCAGDHASTDCTKQRNTPKCTNCGGEHISSYKGCPS
D. persimilis	Dper\HTR3B	HTR3B	P	SYHTKLISRNRIQARDMATRDAIMAILGDAMTGHYTHQHKSDRGLRIVVRDLHHSTSTQLIKNQMAELGYYVIFIRAIKGRSDGQPLDQFELEIAPKPDESHHDVLQLTQLGNQLVTVERQAKPVDPAQCHRCQAFGHTRTYCRRSFVCMKCAGAHASTACAKPRADAPKCANCQGAHISAYKGCPA
D. persimilis	Dper\TR3B	TR3B	P	SYHTKLISRNRIQARDMATRDAIMAILGDAMTGHYTHQHKSDRGLRIVVRDLHHFTSTQLIKNQMAELGYYVIFIRAIKGRSDGQPLDQFELEIAPKPDESHHDVLQLTQLGNQLVTVERQAKPVDPAQCHRCQAFGHTRTYCRRSFVCMKCAGAHASTACAKPRADAPKCANCQGAHISAYKGCPA
D. elegans	Dele_TAHRE	TAHRE	C	YKTRTTKGNGVQINAVDMNSYKIIKQVLAENGISAHTHQARAERGFYVVIRHLHPSTPYKWVIDELQKIGYQTRFIQCMKNRTSGAPMKLHKLEIEPQPDGDHKSILTLKVLGNQSVKVERMHKTREPVQCYNCQGFRHSRNHCLKGPRCMKCAGNHETRVCQKPRSSPATCANCSGSHVSSYKGCPTYQKERNRYLLIK
D. melanogaster	Dmel_TAHRE	TAHRE	C	TTRAIDGNGVRIQAKDMTAFNKIKEVLVANGFPLFTNQPKSERGFRVVIRHLHHSTPCSWIVEELLKLGFQARFVRNMTNPATGGPMRMFEVEIVMAKDGSHDKILSLKQIGGQRVDIERKNRTREPVQCYRCQGFRHAKNSCMRPPRCMKCAGDHLSSCCTKPRSTPATCINCSGEHISAYKGCPVYKAEKQKLATNNID
D. melanogaster	HeT-A	HeT-A	P	SYTTRAIEGNGVRIQAKDMTAYNKIKEVLVANGLPLFTNQPKSERGFRVIIRHLHHSTPCSWIVEELLKLGFQARFVRNMTNPATGGPMRMFEVEIVMAKDGSHDKILSLKQIGGQRVDIERKNRTREPVQCYRCQGFRHAKNSCMRPPRCMKCAGEHLSSCCTKPRTTPATCVNCSGQHISAYKGCPAYKAEKQKLAANNVD
D. melanogaster	Dmel\HeTA	HeT-A	P	SYTTRAIEGNRIQAKDMTAYNKIKEVLVANGLPLFTNQPKSERGFRVIIRHLHHSTPCSWIVEELLKLGFQARFVRNMTNPATGGPMRMFEVEIVMAKDGSHDKILSLKQIGGQRVDIERKNRTREPVQCYRCQGFRHAKNSCMRPPRCMKCAGEHLSSCCTKPRTTATCVNCSGQHISAYKGCPAYKAEKQKLAANNVD
D. simulans	Dsim_TAHRE	TAHRE	C	SYTTRATEGNGVRIQAKDMTAYHKIKDVLIANGFPLFTNQPKSERGFRVVIRHLHHSTPCSWIVKELLTLGFSARFVRNMTNPATGGPMRMFEVEIVMAKDGSHDKIISLKQIGGQRVDIERKNRTREPVQCYRCQGYRHAKNSCMRPPRCMKCAGDHLSSCCTKPRTTPATCVNCSGEHISAYKGCPVYKAEKQKLAANNID
D. simulans	HETA_Dsim	HeT-A	P	SYTTRATEGNGVRIQAKDMTAYHKIKDVLIANGFPLFTNQPKSERGFRVVIRHLHHSTPCSWIVKELLTLGFSARFVRNMTNPATGGPMRMFEVEIVTAKDGSHDKIISLKQIGGQRVDIERKNRTREPVQCYRCQGFRHAKNSCMRPPRCMKCAGDHLSSCCTKPRTTPATCVNCSGEHISAYKGCPVYKAEKQKLAANNID
D. sechellia	Dsec\HeTA	HeT-A	P	SYTTRATEGNRIQAKDMIAYHKIKDVLIANGFPLFTNQPKSERGFRVVIRHLHHSTPCSWIVKELLTLGFSARFVRNMTNPATGGPMRMFEVEIVTAKDGSHDKIISLKQIGGQRVDIERKNRTREPVQCYRCQGYRHAKNSCMRPPKCMKCAGDHLSSCCTKPRTTATCVNCSGEHISAYKGCPVYKAEKQKLAANNID
D. melanogaster	TAHRE_1p	TAHRE	P	SYSTRATEGNGVRIQAKDMTAYNKIKEVLTANGFPLFTNQPKSERGFRVIIRHLHHSTPCSWIVEELLKLGFQARFARNMTNPATGGPMRMFEVEIVMAKDSSHGKIISLKQLGGQRVDIERKNRTREPVQCYRCQGFRHSKNSCMRPPRCMKCAGGHLSSCCTKPRTTPATCVNCSGEHISAYKGCPAYKTEKRKLAVNNID
D. melanogaster	Dmel\TAHRE	TAHRE	P	SYSTRATEGNRIQAKDMTAYNKIKEVLTANGFPLFTNQPKSERGFRVIIRHLHHSTPCSWIVEELLKLGFQARFARNMTNPATGGPMRMFEVEIVMAKDSSHGKIISLKQLGGQRVDIERKNRTREPVQCYRCQGFRHSKNSCMRPPRCMKCAGGHLSSCCTKPRTTATCVNCSGEHISAYKGCPAYKTEKRKLAVNNID
D. sechellia	Dsec_TAHRE	TAHRE	C	SYTTRATEGNGVRIQAKDMTAYHKIKDVLIANGFPLFTNQPKSERGFRVVIRHLHHSTPCSWIVKELLTLGFSARFVRNMTNPATGGPMRMFEVEIVMAKDGSHDKIISLKQIGGQRVDIERKNRTREPVQCYRCQGYRHAKNSCMRPPRCMKCAGDHLSSCCTKPRTTPATCVNCSGEHISAYKGCPFTRLKNKSWRLTTLT
D. sechellia	Dsec\TAHRE	TAHRE	C	SYTTRAIEGNRIQAKDMTAYQKIKDVLTANGFPLSTNQPKSERGFRVVIRHLHHSTPCSWIVQELLKLGFSARFVSNMTNPATGGPMRMFEVEIVMAQDGSHDKIISLKQIGGQRVDIERKNRTREPVQCYRCQGYRHAKNSCMRPPRCMKCAGDHLSSYCTKPKYTATCANCSGEHISAYKGCPAYKAEKRKLAVNNIN
D. erecta	Dere\HeTA	HeT-A	P	SFTTKSTTGNRIQAKDMEAHNKIKDILTLSGIPSHTNQAKSERGFRVVIRHLHHSTPCQWIVGELQKLGFQTIFAKNMLNPATGGPMKIFEAEISFTIDGSHKKILTLRQLGGQKIEVERKNRTREPVQCFNCQGFRHARNSCMKPPRCMKCAGHHLSNQCTKPRSTASCANCSGEHISAYKGCPTYKAEKRKLAVNNID
D. yakuba	Dyak_TAHRE	TAHRE	C	SFTTKTSIGNGVTIQAKDLTAHRTIKDILAKSGIPYYSNQNKSERGFRVVIRHLHPSTPCSWITSELQKLGHQTKFTRNMTNPATGGPMRMHEIEIVSAMDGSHLRILSIKQLGGQKVEIERKNRTREPVQCFRCQGFRHARNTCMKPPRCMKCAGQHWSSECTKPRSTPATCSNCQGNHISAYKGCPAYKAEKQKLAVNRID
D. yakuba	YAKHETA	HeT-A	P	SFTTKTSIGNGVTIQAKDLTAHRIIKDILAKSGIPYYSNQNKSERGFRVVIRHLHPSTPCSWITSELQKLGHQTKFTRNMTNPATGGPMRMHEIEIVSAMDGSHLRILSIKQLGGQKVEIERKNRTRELVQCFRCQGFRHARNTCMKPPRCMKCAGQHWSSECTKPRSTPATCSNCQGNHISAYKGCPAYKAEKQKLAVNRID
D. yakuba	Dyak\HeTA	HeT-A	P	SFTTKTSIGNTIQAKDLTAHRIIKDILAKSGIPYYSNQNKSERGFRVVIRHLHPSTPCSWITSELQKLGHQTKFTRNMTNPATGGPMRMHEIEIVSAMDGSHLRILSIKQLGGQKVEIERKNRTRELVQCFRCQGFRHARNTCMKPPRCMKCAGQHWSSECTKPRSTATCSNCQGNHISAYKGCPAYKAEKQKLAVNRID
D. yakuba	Dyak\TAHRE	TAHRE	P	SFTTKTSIGNTIQAKDLTAHRTIKDILAKSGIPFYSNQNKTERGFRVVIRHLHPTTPCSWITSELQKLGHQTKFTRNMTNPATGGPMRMHEVEIASAMDGSHLRILSIKQLGGQKVEIERKNRTREPVQCFRCQGFRHARNTCMKPPRCMKCAGQHWSSECTKPRSTATCSNCQGNHISAYKGCPAYKAEKQKLAVNRID
D. melanogaster	Dmel_TART	TART	C	SFTTKSGLGNNIRIQAKTMDAYNAIQNVLLGANNPLHSHQPKSANGFLIVIRHLHXSTPTKWIESQLQDIGIATKFIRAMQFTDTINPMRIYEVEVVPGSHLNVLLLKSPGGQTVKVERKRISKXPIQCHRCCFGHTRNYCRNPFKCMKCGQLHATVSYTKPKNLATCANCNGSHKQSYKGCPAFQEAKTRLSINKTQ
D. sechellia	Dsec_TART	TART	C	TTKSELGNNIRIQAKTMDAYNAIQNVLLEANIPLHSHQPKSAKGFQIVIRHLHQSTPTKWIESQLQDIGIATKFIRAMQFRDTRNPMRIHEVEVVPKADGSHLKVLLLKSLGGQTVKVERKRVSKDPTQCHRCQCFGHTRNYCRNPFKCMKCGQPHATVSCTKPKNLPATCANCNGSHVSSYKGCPAFQEAKQRLSINKIQ
D. simulans	Dsim_TART	TART	C	SFTTKSELGNNIRIQAKTMDAYNAIQNVLLEANIPLHSHQPKSAKGFQIVIRHLHQSTPTKWIESQLQDIGIATKFIRAMQFRDTRNPMRIHEVEVVPKADGSHLKVLLLTSLGGQTVKVERKRVSKDPTQCHRCQCFGHTRNYCRNPFKCMKCGQLHATVSCTKPKNLPATCANCNGSHVSSYKGCPAFQEAKQRLSINKIQ
D. melanogaster	TART-B	TART	P	SFTTKSELGNNIRIQAKTMDAHNAIQNVLLEANIPLHSHQPKSAKGFQIVIRHLHQSTPTKWIESQLQDIGIATKFIRAMQFRDTRNPMRIHEVEVVPKADGSHLKVLLLKSLGGQTVKVERKRVSKDPTQCHRCQCFGHTKNYCRNPFKCMKCGQLHATVSCTKPKNLPATCANCNGSHVSSYKGCPAFQEAKQRLSINKIQ
D. melanogaster	TART-C	TART	P	SFTTKSELGNNIRIQAKTMDAYNAIQNVLLEANIPLHSHQPKSAKGFQIVIRHLHQSTPTKWIESQLQDIGIATKFIRAMQFRDTRNPMRIHEVEVVPKADGSHLKVLLIKSLGGQTVKVERKRVSKDPTQCHRCQCFGHTKNYCRNPFKCMKCGQLHASVSCTKPKNLPATCANCNGSHVSSYKGCPVFQEAKQRLSINKIQ
D. melanogaster	TART_A_1p	TART	P	SFTTKSELGNNIRIQAKTMDAYKAIQNVLLGANIPLHSHQPKSAKGFQIVIRHLHQSTPTKWIESQLQDIGIATKFIRAMQFRDTRNPMRIHEVEVVPKADGSHLKVLLLKSLGGQTVKVERKRVSKDPTQCHRCQCFGHTKNYCRNPFKCMKCGQLHATVSCTKPKNLPATCANCNGSHVSSYKGCPAFQEAKQRLSINKTQ
D. melanogaster	Dmel\TARTA	TART	P	SFTTKSELGNRIQAKTMDAYKAIQNVLLGANIPLHSHQPKSAKGFQIVIRHLHQSTPTKWIESQLQDIGIATKFIRAMQFRDTRNPMRIHEVEVVPKADGSHLKVLLLKSLGGQTVKVERKRVSKDPTQCHRCQCFGHTKNYCRNPFKCMKCGQLHATVSCTKPKNLATCANCNGSHVSSYKGCPAFQEAKQRLSINKTQ
D. melanogaster	Dmel\TARTB	TART	P	SFTTKSELGNRIQAKTMDAHNAIQNVLLEANIPLHSHQPKSAKGFQIVIRHLHQSTPTKWIESQLQDIGIATKFIRAMQFRDTRNPMRIHEVEVVPKADGSHLKVLLLKSLGGQTVKVERKRVSKDPTQCHRCQCFGHTKNYCRNPFKCMKCGQLHATVSCTKPKNLATCANCNGSHVSSYKGCPAFQEAKQRLSINKIQ
D. simulans	Dsim\TART	TART	P	SFTTKSELGNRIQAKTMDAYNAIQNVLLEANIPLHSHQPKSAKGFQIVIRHLHQSTPTKWIESQLQDIGIATKFIRAMQFRDTRNPMRIHEVEVVPKADGSHLKVLLLTSLGGQTVKVERKRVSKDPTQCHRCQCFGHTRNYCRNPFKCMKCGQLHATVSCTKPKNLATCANCNGSHVSSYKGCPAFQEAKQRLSINKIQ
D. melanogaster	Dmel\TARTC	TART	P	SFTTKSELGNRIQAKTMDAYNAIQNVLLEANIPLHSHQPKSAKGFQIVIRHLHQSTPTKWIESQLQDIGIATKFIRAMQFRDTRNPMRIHEVEVVPKADGSHLKVLLIKSLGGQTVKVERKRVSKDPTQCHRCQCFGHTKNYCRNPFKCMKCGQLHASVSCTKPKNLATCANCNGSHVSSYKGCPVFQEAKQRLSINKIQ
D. yakuba	Dyak\TART2	TART	P	SFTTKSELGNRIQAKTMDAYNAIQNVLLEANIPLHSHQPKNAKGFQIVIRHLHQSTPTKWIESQLQDIGIATKFIRAMQFRDTRNPMRIHEVEVVPKADGSHLKVLLIKSLGGQTVKVERKRVSKDPTQCHRCQCFGHTKNYCRNPFKCMKCGQLHATVSCTKPKNLATCANCNGSHVSSYKGCPVFQEAKQRLSINKIQ
D. yakuba	Dyak_TART	TART	C	NFTTKSEPGSNIRIHAKTMEAYKAIQNVLQDENIPRHSHQPKGLKGFQIVIRHLHQSTPIKWIESQLQEIGIATKFIRAMQYRDTKNPMRIHEVELVPKADGSHLKVLQLNSLGGQTIKVERKRVSRDPIQCHRCQSFGHTKNYCRNPFKCMKCGQQHATVLCNKPKHIPAYCANCKGNHVSSYKGCPVFQEAKQRLAVNKVR
D. rhopaloa	Drho_TART	TARTAHRE	C	KFSTRSTPGNGVRIQCIDMETYSTVKRLLGEGNFAMFTHQKKSERGFKTVIRHLHHSTPYQWVINELQKVGFTARFVRVMRHRFNDNPMNIFECELQTSPDGSHMNVLKIQKLGSQAVIVERKHRVRDPTMCHRCQGFRHTKMYCKIPYKCMKCAEGHPTATCTKPNNVPPTCANCGGSHVSSYKGCPAFKAERSKLRSHRAP
D. persimilis	Dper\TR4A	TR4A	P	RFTTKSTPGNRIQCADMDAHKKITTLLNDQKVPMHTHQQIGQRGVRYILRHLHYSTTREWISSELKKRHYIVRYTSNMKHRSTGQPINMFEIEIEHKQDGSHDEILKISELGGQAVAFERKWVTRDPLQCHRCQAYGHTRNYCKNAPKCMKCASDHLSTTCTKPRYTAKCVNCGGEHVSCFKGCPA
D. pseudoobscura	Dpse\TR4A	TR4A	P	RFTTKSTPGNRIQCADMDAHKKITTLLNDQKVPMHTHQQIGQRGVRYILRHLHYSTTREWISSELKKRHYIVRYTSNMKHRSTGQPINMFEIEIEHKQDGSHDEILKISELGGQAVAFERKWVTRDPLQCHRCQAYGHTRNYCKNAPKCMKCASDHLSTTCTKPRYTAKCVNCGGEHVSCFKGCPA
D. mojavensis	Dmoj\HTR1C	HTR1C	P	NFYTKPTAGQRIQCANIAAYRKLVHYFAQERIVSHTYQLAADRGFRFCIRYLHRSTPTDWIRQQLTDLGHTVRFVSVIKKRFTRQPLDLFEVEVVAAPNSTNVLNIECLGGQRVKIERILRNADAVQCHRCQKFGHTKNYCRRPFVCVKCSGSHASTDCGRAKGDAKCANCLGEHAASYRGCIA
D. mojavensis	Dmoj\HTR1D	HTR1D	P	SYFVKTTSGRRIQCLSIDSYRKLIHHFEDINLESHTFQIKSERGFRILIRHLHRSTPIEWIKEEFAKLGHTVRYANNIKKRFSGQPLDLFEVEIEAKPNNSSILVTTLLGHQEVKIEKSLHNIDAVQCHRCQKFGHTKNYCRRPFICVKCGNNHPSTECPRQKGSPKCANCLGEHVASYKGCKS
D. mojavensis	Dmoj\TR1D	TR1D	P	SRQTPPSGPSRDQSRHTDKRKLIHHFEDINLESHTFQIKSERGFRILIRHLHRSTPIEWIKEELAKLGHTVRYANNIKKRFSGQPLDLFEVEIESKPNNSGILDTTLLGHQKVKIEKSLHNIDAVQCHRCQKFGHTKNYCRRPFVCVKCGMNHPSTDCPRQKGSPKCANCLGEHVASYKGCKS
D. virilis	Dvir\TR1B	TR1B	P	TYATKPSAGQQVLCNDVDSYRKLVQYFQDNSIASHTYQLKHERGFKIIMRHLHRSTPADWIRTKLSDLGHKARFVSVIKKRFTREPMDMFEIELEPKANNSEILRLNMLGGQKVKVELPLRTTDIVQCHRCQQFGHTKNYCRRAFVCVKCSGKHPSTECSITANDPKCANCEGPHAASYKGCQS
D. virilis	Dvir\TR1A	TR1A	P	NYHTKPTSDRRIQCNDISSYRALVRFFEESNVESHTYQLSSDRGFRVVIRHLHRATPNDWIKQKLSEKGHNVRFVNVIKKRFTGEPLDLFQVELEPKKNNNEIFDLTVLGGQRVKVEKPRRNTDVVQCHRCQQIGHTKNYCRRIFRCVKCGQEHPSTLCEKAPSAAKCANCKGPHVASYRGCIF
D. mojavensis	Dmoj\HTR1E	HTR1E	P	NFTTKPAASHRVQCVDIPTYRKLNNYLKANNIESHTYQLRSERGLRVVIRHLHHSTPDTWIRDHLSKLGHSIKFLRAIKSRYTNQPLDLFELELEKSDNNDDILNLTLLGNQKVRVEKPYKTTDVAQCHRCQQFGHTKNYCRRPFVCVKCGGGHPSTSCTKNKEDAKCANCSGPHAASYKGCIA
D. mojavensis	Dmoj\TR1A	TR1A	P	NYSTKPAANHRVQCKDVATHRKLVRYLDANSIENYTFQLKCERGYRAVIRHLHFSTPDHYIREQLAKLGHEVRFLRGIKSRFTKEPLDLFEVELAVSANNAELLQITAIGNQRVKIERPYKTNEIAQCHRCQKFGHTKNYCRRPFACVKCGANHASTDCGKQKGDAKCANCSGPHAASYKGCPA
D. mojavensis	Dmoj\TR1B	TR1B	P	NYDVKRTSNHRVQCKDIATYRNLVKYLDENKVENYTFQLKSERGFRAIIRDLHYSTPDHYIREKLANLGHQVRFLRGIKSRFTKEPLDLFEVELVPSANNAEFMQITAIGNQRVKIEKPYKSSEVAQCHRCQKFGHTKNYCRRPFACVKCGDNHASTDCGRQKGEAKCANCAGPHAASYKGCPS
D. persimilis	Dper\HTR1A	HTR1A	P	TYDTKTANNGKVMCHTIDGYRTLIRLLSEEGVEYHTYRLRSERGMRVVIRHLHRSTPTDWVREQLDKLGYKVRHIANIPKRFTKEPLDLFEVELEPHETNNRIYELTAICSQRIKVEKPIRAPGVPQCHKCQMFGHSKNYCSRAVVCLKCGEKHDPKDCPKKREDPKCANCNGPHVASYRGCIK
D. pseudoobscura	Dpse\HTR1A	HTR1A	P	TYDTKTAHNGKVMCHTMDGYRALIRLLSEEGVEYHTFRLRSERGMRIVIRHLHRSTPTDWVREQLDRLGYKVRHIANIPKRFTKEPLDLFEVELEPQETNNSIYELTAICSQRIKVEKPIRAPGAPQCHKCQMFGHSKNYCNRAVICLKCAEKHDPKDCPKKREDPKCANCNGPHVASYRGCVK
D. persimilis	Dper\TR1A	TR1A	P	TYDTRPAANRKVMCHTIDGHRALIRLLNEQGVEHHTFRLKSERGMRIVIRHLHRSTPTDWVREQLGRLGYKVRHIANILKRFTKEPLDLFEVELEPQDINNSIYELTAICSQRVKVEKPIRAPGVPQCHKCQMFGHSKNYCNRAVICLKCGDKHDPKDCPKKREEPKCANCEGPHVASYRGCVK
D. pseudoobscura	Dpse\TR1A	TR1A	P	TYDTRPAANRKVMCHTIDGHRALIRLLNEQGVEHHTFRLKSERGMRIVIRHLHRSTPTDWVREQLGRLGYKVRHIANILKRFTKEPLDLFEVELEPQDINNNIYELTAICSQRVKVEKPIRAPGVPQCHKCQMFGHSKNYCNRAVICLKCGDKHDPKDCPKKREEPKCANCDGPHVASYRGCVK
D. takahashii	Dtak_TAHRE	TAHRE	C	QPSSKRGFRVMIRHLHPSTPQSWIVDELRKLGFIASYIQNVRNRITGIPYKIFFVGLRGGDVGSLPKIL
D. takahashii	Jockey-1_DT_1p	Jockey_1	C	YSLKCHPNNSVSILAADSDAYRAITKSLTLKNVPFHSWQLKEXRSYRVVIRGIHHSVPDDNIRESLSLSGHTVRYINRPRSRFDKTRLNLVFIELEPAANNKEIHEIKTLCRQRVQVEIPYKKEDVVQCHRCQAFDHTKNNCHMGFNCVRCGLQHGLKDCLRDVHPVKCVNCGGDHTASYKGCAAYQKAASRRKSVTSY
D. ficusphila	Jockey-3_DF_1p	Jockey_3	C	YSLKCHPNNSVSILASDSDTYRAITKSLTLKKVPYHSWQLKEDRSYRVVIRGVHHSVPDVDIKESLTSAGHLVRFVNRPRSRFDKTKLNLVFVELEPAANNKEIHGIKTLCRQRVQVELPYKKDDVVQCHRCQAFGHTKNHCQKLFNCVRCGLQHGLEACLKDVRPVKCANCGGGHTASYKGCVVYQQVAQRKRVTSQR
D. ananassae	Jockey-6_DAn_1p	Jockey_6	C	YSLKCHPNNSVSILATDSDTYRAITKSLTLKKVPYHSWQLKEDRSYRVVIRGVHHSVPDVDIKESLTSAGHLVRFVNRPRSRFDKTKLNLVFVELEPAANNKEIHGIKTLCRQRVQVELPYKKNDVVQCHRCQAFGHTKNHCQKLSNCVRCGLQHGLEACLKDVNPVKCANCGGGHTASYKGCVIYQQVAQRKSATSQR
D. rhopaloa	Jockey-6_DRh_1p	Jockey_6	C	YSLKCHPNNSVSIIAADSDAYRAITKSLTLKKVQSKYQKTLHCVRCGLQHGVEACLKDIHPVKCVNCGGNHTASYKGCVVYQQIANRRKNVTSH
D. virilis	Dvir\HTR2B	HTR2B	P	WVRMELRRLGHEVRYVGVIKQRFTAKPINTFEIELVKNENNTKILELKQLGSQEIKVERQRKRTDPVQCHRCQAYGHSKNYCRRPFVCLKCGQGHPTTTCSKTRGESKCANCQGQHVKNYKGCKA
D. ficusphila	Jockey-2_DF_1p	Jockey_2	C	FELKALSTNEIKIQPQESIHYTNILKLLKDKETKFYTYRPKDQRGFKVILRHVHHATEKNEIINELADLGHTVLNIHNIQRNDTKKPLPLFSIELKTQDNNKDIYKISHLLHCKVAFEPPHQKRIIPQCTNCQKYGHTRNYCTRDPICVKCAGKHQSANCQITNSDKSKCALCSENHTSNYKGCMVYKALQLKKYPSLRQ
D. ficusphila	Jockey-2_DRh_1p	Jockey_2	C	NTLKRGNILEAKLQVNNEDNFRSVTRYLDNELINYYTYQLKSKKGLQVVLKGIESTVAVAEIAEGLTEKGFDVKHIVNIVNRDKIPQPLFKIELAPETKKNAHPIYNLQYLLHRRITVEEPHKRNGPVQCTNCQEFGHTRTYCTLRPVCVACGDLHCIEACLGNKEDPTKCSNCGGNHTANYRGCPVYKELKSRLNQRRSN
D. elegans	Jockey-6_DEl_1p	Jockey_6	C	TILKRGNISETKLQITNEANYRSVTNFLDSERVNYYTYQLKSSKGLQVVIKGIESTVPAADIAEGLKENGFDVKNVMNITNRAKIPQPLFKIELKPDAKKNAHPIYKLQYLLHRRITVEEPHKRNGPVQCTNCQEFGHTKSYCTLRPVCVACGDLHCIEACTGNKEDPAKCSNCGGNHTANYRGCPVYKEIKSRLNQRRQQ
D. ficusphila	Jockey-4_DF_1p	Jockey_4	C	TNLKRGNISETKLQIKNESNYRTVTNFLDHVPVNYYTYQLKSSKGLQVVVKGIESTVPVADIAEGLKEQGFDVKHVTNIINRAKIPQPLFKIELAPETKKNAHPIYKLQYLLHRRITVEEPHKRNGPVQCTNCQEFGHTRSYCTLRSVCVACGDLHCIDACLRNKEDPAKCSNCGGNHTANYRGCPIYKELKTRLTQRRSK
D. ficusphila	Jockey-8_DF_1p	Jockey_8	C	PETKNNEHPIYKLQYLLHRRITVDEPHKRNGPVQCMNCQEYGHTKTYCTLRAVCVACGDAHSTEACPINKDNHSKCSNCGGNHTANYRGCPVYKELKSRLGQHIT
D. ficusphila	Jockey-1_DF_1p	Jockey_1	C	VPLIKGNIHETKVQTKYEEHFRAVSKYLEETKKNFYTYQLKSSKGLQVVLKGIEPDVAPSEILEALKDKGFSAKNVSNIINKNKKPQPLFKVELEPDSKKNEHPIYKLQFLLHRRITVEEPHKRNGPVQCTNCQEFGHTRTYCTLRSVCVVCGDFHNSAHCPANKEDPHKCGNCGGNHTANYRGCLVYKELKSRMRQAT
D. elegans	Jockey-2_DEl_1p	Jockey_2	C	IPLMKGNISETKLQTKTEDDFRAVSKYLNDAKKNYYTYQLKSCKGLQVVLKGIEPDVTPSEIIEALKENGFCAKNVINIMNKNKKPQPLFKVELEPDSKKNAHPIYKLQYLLHRRITVEEPHKRNGPVQCTNCQEYGHTRAYCTLRSVCVACGNCHGSEPCPANKGDSLKCVNCQGNHTANYRGCPVYKEMKSRMQRAT
D. elegans	Jockey-5_DEl_1p	Jockey_5	C	IPLVKGSIHETKVQTKNEDNYRVLSKYLNDKKKNFYTYQLKSSKGLQVVLKGIESDVTPEEVKNALQDKGFNTKTVFNILNRDRKPQPLFKIELEPETNRNEHPIYKLQFLLHRRITVEQPHKRNGPVQCTNCQEYGHTKSYCTLRPVCVVCGDLHDSALCPASKNDSNKCGNCGGNHTANYRGCPIYKELKSRIHQRGT
D. ficusphila	Jockey-7_DF_1p	Jockey_7	C	IPLTKGEIHETKVQVKSEESFRKLTELLDAKKKNYYTYQLKSSKGQQVVIKGIEPDVSTAEVEQALKDKGFNVKTVINIRNRNKQPQPLFKVELAPDSKKNEHPIYNLQFLMHRRITVEEPHKRNGPVQCANCQEYGHTKSYCTLRSVCVACGGLHTSAKCELKNEPNKCSNCGGDHTANYRGCPVYKELKSRINQRVS
D. rhopaloa	Jockey-4_DRh_1p	Jockey_4	C	TPLVKGNIHETKLQAKTEDQFRAVTIT
D. virilis	Dvir\HTR0A	HTR0A	P	DYGLKLGSPGRILPKTLETYSKIINVLNLNSINYNTYQRREERSFRVVVRGIHASTSTDAIRNELTCMGYTIRNVYCPKYKNRSGPPNIFFVELAPDPAKNRTIFGIKNLCKYVVRFEWKINGKKLPQCHRCQRFNHTARYCRHPARCVKCGNEHLTQTCVKPANVATCANCGSDHTANYKGCPL
D. virilis	Dvir\HTR0B	HTR0B	P	EYGLKLGGPGRILPKTLDTYLKIINVLETNTYHFNTYQRREERSFRVVVRGIHATTSTIAIRNELSCLGYTPRSVYNPQFKNRSGSPNLFYIELAPDPIKNRTIFNVRTLCKFVVRFEWKINSKRLPQCHRCQRLNHTARYCRHSPRCVKCGDNHFTNDCTKPANLPKCANCNNSHTANYKGCPL
D. takahashii	Jockey-6_DTa_1p	Jockey_6	C	FRLKTTGRSSCRITVDDGSIYRVVQKLFKDNGIPYSTFQFKNERAFRIVIKGLNASTEVDEIIARLKELGHNPRNVYNPPGENGKAKRDIFFVELEPAKNNKDVYNIRVIDYQVVTIKPQIQRKGPLRCFKCQSFNHSKNFCMFSPKCARCAGDHDTKKCPALKEDQFKCINCGSNHSASSRSCPAYLEQCEKRKSNSTP
D. takahashii	Jockey-2_DT_1p	Jockey_2	C	IRFKITGPATVRVSPFDGDTYKLVQQLLWSNNIPFNSWQLKSDRSFRIVVKGLHSSTDPEDIKADLGAAGHVVRNVYNPPGKNNGHRPNIFFVELESSTNNVKVYDIKSLAYQSITIVPPERRDEVVRCYXCQDFGHTKTYCFVPPKCAKCGGDHESRVCPATSQDQFKCINCGSNHSAGYRKCPAFLEAIARRKSGTIK
D. melanogaster	Dmel_Jockey	Jockey	C	YYIRISRFGVSRIYTANPDAFRTAVKELNKLNCQFWHHQLKEEKPYRVVLKGIHANVPSSQIEQAFSDHGYEVLNIEATKNFKTRQNLFYINLKQGPNVKESLKITRLGRYRVTVERATRRKELLQCQRCQIFGHSKNYCAQDPICGKCSGPHMTGLCSDVLCINCGGDHVSTDKSCVRAEKAKKLKPRSRLP
D. biarmipes	Jockey-1_DBi_1p	Jockey_1	C	LFTTNVTNAARSANVYTANNHGRALIRHSNPTIAEILVRKRALRRYIRTHSPEDKAQWHRCARELHVAMAELKNFTKKVKRMPQKVTPLKLKPGKPEQDRPISLLPSLSKERLIASRLIIHLEDNDTIPMHQFGDNKEYCNADDVCFLSSSNSETESANNIKINESKCVNVCFTTKAKYLGLTLDKRLTFREHIARVV

## Sheet: RT_Tree_Fig.S3
Table S2. List of consensus domains used for phylogenetic tree building in main text and supplement (by tab).
Species	Reference_name	RT	Source (P,C =Published, our Consensus)	Consensus_sequence
D. virilis	Dvir\TR2A	TR2A	P	CILRHGHFPRQWKCAAIKTILKPGKPTEDVASYRPISLLAGFSKIFERLLMYRLYECSEFAKAVPLHQFGFRKDHGTEQQLARVTQFILSAFEKKQYCSAVYIDIREAFDRVWHEGLLLNLARYCLIGCIMVLKSYLLDRTFIVHGNEGIKSRIGKVSAGVPQGSVLGPILYIIYTSDMPLPHIATPPN-PTTTAATITNTETSITNPYNCSMLLSTFADDTVIMSSADILQTSYSANQTYLRQFTIWCNRWCIQINDSKSAHVVHTLRNLNS-RMNYLTPRLNGQEIPSKPRQKYLGVHLDRKLHMQHHVTQLRCRLKALYNKLEWLIGNKSVLSVECKITIYKQMIAPIWRYALPIWGAMISDTQLRRIESTQNWILRKIVKASW--WTRNKDI
D. virilis	Dvir\TR2B	TR2B	P	CILRHGHFPRQWKCAEIKMVLKPGKPTEEVSSYRPISLLAGFSKIFERLLMTRMFECKDFAQAVPNHQFGFRKEHGTEQQLARVTQFILKAYENRQYCSAVFIDIREAFDRVWHEGLLSKLAKLLPAVLWNVLKSYLTDRTFIVNGNEGTRSRIGHISAGVPQGSVLGPILYIIYTSDMPLPSLVLRSLWPTTRSTT----SASADTSLIPSTLLSTFADDTVIMCSEPLPDRAVTKNQRYLHEFEKWTKRWCIQVNVSKTAHVMFTLRTIQRHSQTPTSPRLYGQQITNKTRHQYLGINLDKKLNMNHHVTTLCARTRALCNKLDWLIGANSPLSIDCKMMIYKQMIAPIWRYALPIWGALVSATQFQRLEVGQNKILRKIARATR--YTRNQSI
D. ananassae	Dana\TR2A	TR2A	P	CMLRYSYFPKQWKRAAITMIKKPGKTPHEVSSYRPISLLPGFSKIFETLLMHRMFKIQDFERAIPSHQFGFRKQHSTEQQLLRVTQHILSAYEQKMYCSAVFIDVSEAFDRVWHDGLLLKLAKLLPHSLYKILQSYLTDRSFTMNSTNGIPSRTGKISAGVPQGSVLGPILYTVFTSDMPLPEVISSQH------------TYNPSY--FENMMLSTYADDTIILCTKREPQLAIQTTESFLKYITDWATNWCITLNPNKTIHVLFTKRSVAN-LTGNKSPKMKGILIKNEPKHRYLGLILDRKLLLHHHINQLQNRIRNVAAGLNWIIGTKSKLSPQSKILLYKQIIAPIWQYALPLWGALTSNTQFQRIEAAQSKLIRKILKAGR--YTRNQVL
D. ananassae	Dana_TR2_O2	TR2	C	CMLRYSYFPKQWKRAAITMIKKPGKTPHEVSSYRPISLLPGFSKIFETLLMHRMFKIQDFERAIPSHQFGFRKQHSTEQQLLRVTQHILSAYEQKMYCSAVFIDVSEAFDRVWHDGLLLKLAKLLPHSLYKILQSYLTDRSFTMNSTNGIPSRTGKISAGVPQGSVLGPILYTVFTSDMPLPEVISSQH------------TYNPSY--FENMMLSTYADDTIILCTKREPQLAIQTTESFLKYITDWATSWCITLNPNKTIHVLFTKRSVAN-LTGNKSPKMKGILIKNEPKHRYLGLILDRKLLLHHHINQLQNRIRNVAAGLNWIIGTKSKLSPQSKILLYKQIIAPIWQYALPLWGALTSNTQFQRIEAAQSKLIRKILKAGR--YTRNQVL
D. elegans	Dele_TR2	TR2	C	SILRYGHFPEQWKCAAISMIRKPGKNPHEVSSFRPISLLAGFSKIFETLLMDRMFACKDFELAVPMHQFGFRKEHNTEQQLRRVTQYILTAYEKKMFCSGVFIDVSEAFDRVWHDGLLLKLAKLLPFCLYRVLESYLTDRTFYVNGNSGITSRKGKIGAGVPQGSVLGPVLYTIFTSDMPLPTIAGQQH------------THTSDL--FNNILLSTYADDTIILCASKEAHSAINTNQKYLSLITKWASQWCITLNANKTVHVLFSRRSTTS-LLGPKSPCMNGVEIKNETKYRYLGLLLDRKLILHLHTTQLINRLRSTAFGLNWILGNQSKLPTSSKITLYKQLIAPVWQYALPIWGSLISNTRFKQIEATQNKIIRRIVNASR--YIRNQDI
D. persimilis	Dper\TR2A	TR2A	P	CILRHGHFPKQWKCAAITMIKKPSKNANEVGSYRPISLLAGFSKIFETLLMERMFECEDFEKAIPSHQFGFRKEHSTEQQLARVTQYILDAYEKQLFCSAVFIDVSEAFDRVWHNGLLLKLAKLLPFTYYNVLKSYLADRTFIVNGNNGIRSRPGRICAGVPQGSVLGPVLYTVFTSDMPLPHLSEQNE------------RIESNI--YNNMMLSTYADDTIILCAKKEASTAVRTNQCYLEHFTAWASKWCISLNTSKTVHVLYTRRSIAN-GIGELSPKMYNEAIKSKPRHRYLGLIMDRKLVLHAHTTQLAIRVRAAAIRLNWIIGHQSRLSKRCKMVIYKQLIAPIWQYALPVWGALVCESQFCRVESAQNQLLRKIVKASR--YTRNQVI
D. pseudoobscura	Dpse\TR2A	TR2A	P	CILRHGHFPKQWKCAAITMIKKPSKNANEVGSYRPISLLAGFSKIFETLLMKRMFECEDFEKAIPSHQFGFRREHSTEQQLARVTQYILDAYEKQLFCSAVFIDVSEAFDRVWHNGLLLKLAKLLPFTYYNVLKSYLADRTFIVNGNNGIRSRPGRICAGVPQGSVLGPVLYTVFTSDMPLPHLSEQNE------------RIESNI--YNNMMLSTYADDTIILCAKKEASTAVRTNQRYLEHFTAWASKWCISLNTSKTVHVLYTRRSIAN-GIGELSPKMYNEAIKSKPRHRYLGLIMDRKLVLHAHTTQLAIRVRAAAMRLNWIIGHQSRLSKRCKMVIYKQLIAPIWQYALPVWGALVCESQFCRVESAQNQLLRKIVKASR--YTRNQVI
D. rhopaloa	Drho_TR2	TR2	C	CILRYGHFPSKWKCAYISMIKKPGKSHHEVDSYRPISLLAGFSKIFEVLLMKRMFRCKDFEDAVPAHQFGFRRGHSTEQQLFRVTQFIQNAFKQKLHCSAVFIDVSEAFDRVWHQGLLLKLAKLLPYCLLKTLDSYLTNRTFIVNGYNGHQSRIGTIAAGVPQGSVLGPILYTIYTADMPLPSSVERTL------------FKEQVD--HKFMLLSTYADDTIIMCADKAAHIAINTNTTYLYEITEWASDWGITLNANKTVHVMFSNRTVSV-SRGPKAPLIHGKIIQSHFKHRYLGLLLDKRLKLNHHTTQLANRVRASAYGLNWILGKQSKLPAASKALLYKQMIAPIWHYALPVWGPLVSKTQFKKIEVSQNKILRWVVQAGR--YTRNKVI
D. ficusphila	Dfic_TR2	TR2	C	CILRHGHFPQQWKQAAITMIKKPGKSHYEAGSYRPISLLAGFSKIFESLLMKRLFKCDDFEKAIPYHQFGFRKDHNTEQQLFRATQYILNSLQNKMYCSAVFIDVSEAFDRVWHEGLLLKLAKLLPFPLYKVLESYLSDRTFIVNGPNGTTSRLGKITAGVPQGSVLGPILYTIYTSDIPLPRIIGPEY------------SYNSEP--FENMLLSTYADDTIIMCANRYGHIAIDTNTKYLKAVTNWAKDWGVTLNGSKTVHVMFSRRSAAS-IYGPKSPKIYGNLIKTEPRHRYLGLLLDSKLHLHLHTTQLVNRVRATITRLKWILGNQSKLSTESKVLLYKQI---------SLCGNIQSQSGAPWSQTPNLK-------------------
D. grimshawi	Dgri\TR2A	TR2A	P	SILRFGHFPQQWKCAGITMLLKPGKSTESVSSYRPISLLSGFSKLFEKVLMRRLFECKDFASAVPSHQFGFRKEHSAEQQLARVTQFILGAYERRQYCSAVFVDISEAFDRVWHAGLLYKLIRLLPPTLYRVLQSYLSDRSFVVNT-GGVRSRPGIICAGVPQGSVLGPILYTISSSDMPLPSLIRSEQ------------LSAFPS--DCTMLLSTYADDTIVLCAHNGAREAIRGNQCFLNKFMAWANYWCIKINVSKTAHVVFSRRRPAH-SLKLPAIKLDGQIVEMQSKQRYLGLLLDRKLILHSHVTQLCIRLRALCRKLDWLLGRSSMLHRSCKVVVYKQLMAPVWQYAFPIWGALVSNTQMRRIETLQNVILRKILQVSW--YTRNQVI
D. virilis	Dvir\TR2C	TR2C	P	CILRYGFFPRQWKCAEISMILKPGKSTGEISSYRPISLLAGFSKLFEKLLLNRLFECKEFANAIPSHQFGFRKDHGTEQQLARVTQYILNAYEKRQYCSAVFIDISEAFDRVWHAGLLVKLIKLLPLALYNVLESYLAERIFIVKCNDGIKSRPGKVCAGVPQGSVLGPILYTIFSSDMPLPRLVMKEY------------ASFE----PNKMQLSTYADDTIVMCASQNILEAVNLNEKYLIHLMRWAEKWCIKINSSKTAHVMFSMRRLDA-TLVRLCPMINGQTIENNGRHRYLGLVLDRKLTLNIHITQLCIRLRGVHKKLDWLLGKNSRLARNCKAVVYKQLIAPIWQYALPVWGALVSNSQIKRIETMQNKILRACMNASW--YTRNQTL
D. persimilis	Dper\TR3A	TR3A	P	SIFRLGHFPSQWKHAQIKMILKPGKNTADMCSYRPISLLSGLSKIFEKLLMARLFEVENFAKAVPNYQFGFRREHGTEQQLARVTQYILKAYEKKQVCSAIFLDISEAFDRVWHEGLLYKLMKLLPLNLYCILESYLAERTFRVSCGDEELSRIGKISAGVPQGSVLGPILYTIYASDMPMPHLIQDST------------GFHPE---RETMLLSTYADDTVIMSASGIPNVAVKYNQRYLTHFSIWAKKWCININAKKTGHVIFTLRTIRS-TDLRQTPTINGQAVPLAKSHTYLGIKLDKKLTLSSHITRICTKLRSRAAKLDWLAGPKSRLPSETKAIVIKQLIMPIWQYGLPVWGALTSDSQLRRVQSLQNKIIRRAMKATR--FTRNDAI
D. pseudoobscura	Dpse\TR3A	TR3A	P	SIFRLGHFPSQWKHAQIKMILKPGKNTADMCSYRPISLLSGLSKIFEKLLMARLFEVENFAKAVPNYQFGFRREHGTEQQLARVTQYILKAYEKKQVCSAIFLDISEAFDRVWHEGLLYKLMKLLPLNLYCILESYLAERTFCVSCGNEELSRIGKISAGVPQGSVLGPILYTIYASDMPMPYLIPDST------------GFHPE---RESMLLSTYADDTVIMSASAIPNVAVKNNQRYLTHFSIWAKKWCININAKKTGHVIFTLRTIRS-TDLRQTPTINGQAVPLDKSHTYLGIKLDKKLTLSSHITRICRKLRSRAAKLEWLAGPKSRLPNETKAIVIKQLIMPIWQYGLPVWGALTSDSQLRRVQSLQNKIIRRAMKATR--FTRNDAI
D. mojavensis	Dmoj\TR3A	TR3A	P	SMLRLDYFPSKWKHAIVTMIQKQGKMSSDVKSYRPISLTSGFAKIFEKLLLTRLFEVEDFAKAMPSHQFGFRRKHGTEQQLARVTQFILRAYERKQYCSAVFIDIAEAFDRVWHEGLLLKLAKLLPIRLFNILESYLENRTFVVSC-NGVTSRVGRVSAGVPQGSVMGPILYTIFSSDMPLPSQEHTNR------------IGLP----QEEMLLSTFADDTVIMSAADLPVMAVRANERYLQHFEKWTKKWAINLNANKTGHVLFSLRQSNR-RELQVTPKVFGKAVPYKCSHTYLGITLDRKLNMKQHVARLRAKIRTRAAKLDWMIGRDSLLAKSCKAVLIKQLIMPLWQYALPIWGALTTESQITRIQGMQNRIIRRALRVPW--LTRNAAI
D. persimilis	Dper\TR4A	TR4A	P	SMLRLGHFPQAWKHATITLLLKPNKPAQSVTSYRPISLLSGLAKTFEKLFIKRLFDFEDFSRALPTHQFGFRKEHATEQQLARVTQFIMGAFEEKQYCSAVFIDISEAFDRVWHTGLLYKLSKLVSLQAFKLLESYLNERTFEVITNNGITSRIGKIKAGVPQGSNLGPLLYSIYSSDVPLPNCLNGYH------------PTSIPVLREKNRMLATYADDTIIMSRADFPLTAAKMNEQYLNKFSVWAKKWEMGINEKKTAHVFFTLNKLSK-TQQESTPKLNGQRIPNKFKQMYLGVTLDRKLSLNHHVKAIINKTRTASIKLDWIIGCKSRLAKECKVTILKQLIMPIWFYAFPVWGALASDSLVKKIQTLQNKLVRRAVRATI--YTRNDNI
D. pseudoobscura	Dpse\TR4A	TR4A	P	SMLRLGHFPQAWKHATITLLLKPNKPAQSVTSYRPISLLSGLAKTFEKLFIKRLFDFEDFSRALPTHQFGFRKEHATEQQLARVTQFIMEAFEEKQYCSAVFIDISEAFDRVWHTGLLYKLSKLVSLQAFKLLESYLNERTFEVITNNGITSRIGKIKAGVPQGSNLGPLLYSIYSSDVPLPNCLNGYH------------PTSIPVLREKNRMLATYADDTIIMSRADFPLTAAKMNEQYLNKFSVWAKKWEMGINEKKTAHVFFTLNKLSK-TQQESTPKLNGQRIPNKFKQMYLGVTLDRKLSLNHHVKAIINKTRTASIKLDWIIGCKSRLAKECKVTILKQLIMPIWFYAFPVWGALASDSLVKKIQTLQNKLVRRAVRATM--YTRNDNC
D. persimilis	Dper\TR4B	TR4B	P	SIMRLGHFPQAWKHATIALILKPNKPAQSVASYRPISLLSGLAKTFEKLFIKRLFDFDDFSRALPTHQFGFRKEHATEQQLARVTQFIMGAYEEKKYCSAVFIDISEAFDRVWHTGLLYKLSKLVSLQAFKLLESYLNDRTFEVITNNGTTSRTGKIRAGVPQGSNLGPLLYSIYSSDIPLPNCMRSYH------------PTEIPVLREKNRMLATYADDTIIMSIADFPSVAAKMNEQYLNKFSVWAKKWEMGINEKKTAHVFFTLNSLSR-TQQESTPRINGQRIPNKFKQTYLGVVLDRKLSLSPHVKTIINKTISTSIKLDWIIGNKSHLARDCKVTILKQLIMPIWYYAIPVWGALASDSLIKKIQTLQNKLVRRSVRATR--YTRNDNI
D. melanogaster	Dmel_TAHRE	TAHRE	C	NILRTGYFPNAWKHASVKMIPKPGKSPFALNSYRPISLLSGLSKLLERLLLKRLFDVDSFAKAIPSHQFGFRKEHGTEQQIARVTQFILEAFEEKEVCSAVFLDITEAFDRVWHEGLLYKLAKLIPRYLFDILESYLTNRTFSVKIDGETTSRIGNIRAGVPQGSILGPLLYSIFSSDMPYPIIKDYMR------------NISFPDYHPTNIILSTYADDTIVLSRSKYTKLAINLNQNYLNVFCRWAKKWDISVNAKKTGHVLFSLKKDQT-N-IYTPPLINGQRAAKLNKQRYLGVMLDRKLTFCAHVTLLKGKTIAAYKKLEWLLGKRSHLPKNAKILIWKQILSPIWHYAIAIWGSLVSDTQARKIQTMENKYIRRIINASR--YTRQADI
D. sechellia	Dsec_TAHRE	TAHRE	C	NILKIGHFPNKWKHASISMIPKPGKSPFALNSYRPISLLSGLSKLLERILLKRLYDIDYFAKAIPSHQFGFRKDHGTEHQLARVTQFILKAFEEKDVCSATFLDITEAFDRVWHDGLLYKLSRLIPRYLFDLLENYLSNRTFSVRIDGETTSRIGKIRAGVPQGSILGPVLYSIYSSDMPYPIVKDYMR------------HISFPDYNQTNTILATYADDTIILSRSKYTNIAINLNQNYLNVFCRWSKKWDIAINAKKTGHILFSLKREET-N-TYTPPTINGQRAAKLNKQRYLGLMLDRKLTFGAHITLLKGKTIAAYKKLEWLVGKNSHLPKNAKVLLWKQIVSPIWHYAIAIWGSLVSDTQANKIQTMENKFIRRIINASR--YTRQATI
D. sechellia	Dsec\TAHRE	TAHRE	P	NILKTGHFPNKWKHASISMIPKPGKSPFALNSYRPISLLSGLSKLLERILLKRLYDIDYFAKAIPSHQFGFRKDHGTEHQLARVTQFILKAFEEKDVCSATFLDITEAFDRVWHDGLLYKLSRLIPRYLFDLLENYLSNRTFSVRIDGETTSRIGKIRAGVPQGSILGPVLYSIYSSDMPYPIVKDYMR------------HISFPDYNQTNTILATYADDTIILSRSKYTNLAINLNQNYLNVFCRWSKKWDIAINAKKTGHILFSLKREET-N-AYTPPTINGQRAAKLNKQRYLGLMLDRKLTFGAHITLLKGKTIAAYKKLEWLVGKNSHLPKNAKILLWKQIVSPIWHYAIAIWGSLVSDTQANKIQTMENKYIRRIINASR--YTRQATI
D. simulans	Dsim_TAHRE	TAHRE	C	NILKTGHFPNKWKHASISMIPKPGKSPFALNSYRPISLLSGLSKLLERILLKRLYDIDYFAKAIPSHQFGFRKDHGTEHQLARVTQFILKAFEEKDVCSATFLDITEAFDRVWHDGLLYKLSRLIPRYLFDLLENYLSNRTFSVRIDGETTSRIGKIRAGVPQGSILGPVLYSIYSSDMPYPIVKDYMR------------HISFPDYNQTNTILATYADDTIILSRSKYTNLAINLNQNYLNVFCRWSKKWDIAINAKKTGHILFSLKREET-N-AYTPPTINGQRAAKLNKQRYLGLMLDRKLTFGAHITLLKGKTIAAYKKLEWLVGKNSHLPKNAKILLWKQIVSPIWHYAIAIWGSLVSDTQANKIQTMENKYIRRIINASR--YTITDTI
D. simulans	Dsim\TAHRE	TAHRE	P	NILRTGHFPNKWKHASISMIPKPGKSPFALNSYRPISLLSGLSKLLERILLKRLYDIDSFAKAIPSHQFGFRKDHGAEHQLARVTQFILKAFDEKDVCSATFLDITEAFDRVWHDGLLYKLSRLIPRYLFDLLENYLSNRTFSVRIDGETTSRIGNIRAGVPQGSILGPVLYSIYSSDMPYPIVKDYMR------------NISFPDYHPTNIILATYADDTIILSRSKYTKLAINLNQNYLNVFCRWSKKWDIAINAKKTGHILFSLKKEQT-N-IYTPPLINGQRAAKLNKQRYLGLMLDRRLTFCAHMTLLKGKTIAAYKKLEWLIGKNSHLPKNAKILLWKQIVSPIWHYAIAIWGSLVSDTQAKKIQTMENKYIRRIINASR--YTRQADI
D. melanogaster	TAHRE_2p	TAHRE	P	NILRTGHFPNKWKHASISMIPKPGKSPFALNSYRPISLLSGLSKLLERILLKRLYDIDSFAKAIPSHQFGFRKDHGAEHQLARVTQFILKAFDEKDVCSATFLDITEAFDRVWHDGLLYKLSRLIPRYLFDLLENYLSNRTFSVRIDGETTSRIGNIRAGVPQGSILGPVLYSIYSSDMPYPIVKDYMR------------NISFPDYHPTNIILATYADDTIILSRSKYTKLAINLNQNYLNVFCRWSKKWDIAINAKKTGHILFSLKKEQT-N-IYTPPLINGQRAAKLNKQRYLGLMLDRRLTFCAHMTLLKGKTIAAYKKLEWLIGKNSHLPKNAKILLWKQIVSPIWHYAIAIWGSLVSDTQAKKIQTMENKYIRRIINASR--YTRQADI
D. melanogaster	Dmel\TAHRE	TAHRE	P	KILNTGHFPKKWKHACITMILKPGKSPSLLNSYRPISLLSGLSKIFERIILNRLYNIESFSKAIPNHQFGFRKGHGAEHQLARVTQFILKAYEDKEVCSATFLDITEAFDRVWHDGLLLKLTKLIPKQLFNVLESYLTGRTFQVRINNETCSRIGTINAGVPQGSILGPVLYSIYTSDMPFPIIKGYIR------------NISLPDYHPKNIILATYADDTIIISRSNNTRSAININQTYINKFCRWAKKWDIAINGKKTGHVLFSLKNISE-N-VHTTPIVDGQRAIKLCKHRYLGVMLDRRLTFGAHLILLKGKIIAAYKRLEWLLGKNSHLPKRTKLLLWKQIISPIWHYAIAIWGSLTSATQTKKIQTLENKLIRRIIKANR--YTKQSAI
D. yakuba	Dyak_TAHRE	TAHRE	P	KMLNTGYFPKKWKHACISMILKPGKSPSLLNSYRPISLLSGLSKIFERIILNRLFKIESFSKAIPNHQFGFRKGHGAEHQLARVTKFILEAYEEKEVCSATFLDITEAFDRVWHDGLLLKLTKLIPNQLFILLESYLTDRTFQVRVNNETSSRIGTINAGVPQGSILGPVLYSIYTSDMPPPILKGYIR------------NISLPDYQPKNIILATYADDTIIISRSNNPRTAININQTYINTFCRWAKKWDIAINGKKTGHVLFSLKEKTE-N-IYTPPTVDGQRATKLSKHGYLGVTLDRKLTFGAHLILLKGKIIAAYKRLEWLIGKNSHLPKKTKLLLWKQIISPIWHYAIAIWGSLTSATQTKKIQTLENKLIRRIINANR--YTKQLTI
D. yakuba	Dyak\TAHRE	TAHRE	P	SILRTGHFPGQWKHAMITMILKPGKTPTSVKSYRPISLLSGFSKLFERILMTRLFDVESFSRAIPHHQFGFRKEHGAEHQLARVTQFVLKAFEQGEVCSAIFLDITEAFDRVWHDGLKLKLSKLLPMSLFRIVESYLQDRSFTVKL-NNTLSKTGKVTAGVPQGSNLGPILYSIYSSDMPQLIPTKYVF------------NVSWPEYHSKNSLLATYADDTVLLSCDKITKAAVDRNQRFVDLYCKWAKKWDIAIN-------------------------------------------------------------------------------------------------------------------------------------------
D. takahashii	Dtak_TAHRE	TAHRE	P	RILQTGHFPSQWKHATITMILKPKKSPSCASSYRPISLLPCFSKILEKILMVRLFETESFAKAIPHHQFGFRKEHSAEHQLSRVTQFILKAFEEKEVCSATFVDVSEAFDRVWHDGLLVKLAKLLPTCMFNVLENYLLNRTFSVKLGNGTTSKTCKITAGVPQGGNLAPILFSVFTSDMPLPIPINPSY------------ERSFPNYFPKNMLLATYADDTVILSSASTANTATELSNTYLSKYCSWAKHWDISINAKKTGHILFSLRGKEN-P--YTTPLVDGQRTKKQNKQCYLGVILDKKLTLKPHILQLRAKIFSSYKKLEWLLGKKSKLPDNTKTLLFKQIISPIWHYSIAVWGSLISETSAKQIQTVENKLIRKSIGASR--YTKQSTI
D. elegans	Dele_TAHRE	TAHRE	P	SILRIGYYPDAWCHAQVKMILHPGKSSYSPKSFKPISLLSGLSKMFERLLLKRLFRVDLFKKAIPLHQFGFRKEHGTEQQIARVTQFILEAFERKEYCSAVFLDISEAFDRVWHEGLLLKLAKILPYNLYIILESYLTNRTFEVKDQAGETSRTGQIGAGVPQGSNLGPLLYSIFSSDMPLPYIYRPSP--------------------TERIMLSTYADDTIVLSSDTLATAATRNNENYLKTFSDWADKWGISVNAAKTGHVIFTLKNDLP-T-NSNNVKIKGQRDVKENKQSYLGLELDSKLTLSXHVTKLXGKYSTAYRKXDWILNNRSKLPTXTKMLILKSVLSPIWQYAIAAWGPLVTDAQIRRVQVEENRKIRDICRTTE--YTDNETI
D. melanogaster	Dmel_TART	TART	P	SILRIGYYPDAWKHAQVKMILKPGKSVNDPKSYRPISLLSGLSKIFERLLLKRLFRVDLFKKAIPLHQFGFRKEHGTEQQIARVTQFILEAFERKEYCSAVFLDISEAFDRVWHEGLLLKLAKILPYNLYIILESYLTNRTFEVKDQAGETSRTGQIGAGVPQGSNLGPLLYSIFSSDMPLPYIHRPSP--------------------TERIMLSTYADDTIVLSSDILPTAATRNNENYLRTFSDWADKWGISVNASKTGHVIYTLKNDIP-T-NLKTMKIKGQAVKKESKQSYLGVILDSKLTLSPHVTKVVGKYLTAYRKMSWILNERSKLPTNTKMLILKSVLSPIWQYAIAAWGPLVTDAQIRRLQVEENKKMRDIFRAGR--YTKNQTI
D. sechellia	Dsec_TART	TART	C	SILRIGYYPDAWKHAQVKMILKPGKSVNDPKSYRPISLLSGLSKMFERLLLKRLFRVDLFKKAIPLHQFGFRKEHGTEQQIARVTQFILEAFERKEYCSAVFLDISEAFDRVWHEGLLLKLAKILPYNLYIILESYLTNRTFEVKDQAGETSRTGQIGAGVPQGSNLGPLLYSIFSSDMPLPYIHRPSP--------------------TERIMLSTYADDTIVLSSDILPTAATRNNENYLRTFSDWADKWGISVNASKTGHVIYTLKNDIP-T-NLKTMKIKGQAVKKESKQSYLGVILDSKLTLSPHVTKVVGKYLTAYRKMSWILNERSKLPTNTKMLILKSVLSPIWQYAIAAWGPLVTDAQIRRLQVEENRKMRDIFRAGR--YTKNQTI
D. sechellia	Dsec\TART	TART	P	SILRIGYYPDAWKHAQVKMILKPGKSVNDPKSYRPISLLSGLSKMFERLLLKRLFRVDLFKKAIPLHQFGFRKEHGTEQQIARVTQFILEAFERKEYCSAVFLDISEAFDRVWHEGLLLKLAKILPYNLYIILESYLTNRTFEVKDQAGETSRAGQIGAGVPQGSNLGPILYSIFSSDMPLPHIYHPSP--------------------TERIMLSTYADDTIVLSSDILATAATRNNENYLKTFSDWADKWGISVNAAKTGHVIYTLKNDIP-T-NLKTMKIKGQAIKKESKQSYLGVILDSKLTLSPHVTKVVGKYLTAYRKMSWILNERSKLPTNTKMLILKSVLSPIWQYAIAAWGPLVTDAQIRRIQVEENRKMRDICRAGR--YTKNQTI
D. melanogaster	TART-A_2p	TART	P	SILRIGYYPDAWKHAQVKMILKPGKSVNDPKSYRPISLLSGLSKMFERLLLKRLFRVDLFKKAIPLHQFGFRKEHGTEQQIARVTQFILEAFERKEYCSAVFLDISEAFDRVWHEGLLLKLAKILPYNLYIILESYLTNRTFEVKDQAGETSRAGQIGAGVPQGSNLGPILYSIFSSDMPLPHIYHPSP--------------------TERIMLSTYADDTIVLSSDILATAATRNNENYLKTFSDWADKWGISVNAAKTGHVIYTLKNDIP-T-NLKTMKIKGQAIKKESKQSYLGVILDSKLTLSPHVTKVVGKYLTAYRKMSWILNERSKLPTNTKMLILKSVLSPIWQYAIAAWGPLVTDAQIRRIQVEENRKMRDICRAGR--YTKNQTI
D. melanogaster	Dmel\TARTA	TART	P	SILRLGYYPEAWKHAQVKMILKPGKSTNEPKSYRPISLLSGLSKIFERLLLKRLFKVDLFKKAIPLHQFGFRKEHGTEQQIARVTQFILEAFEKKEYCSAVFLDITEAFDRVWHEGLLLKLAKILPYNLYIILESYLTNRTFEVKDQAGETSRTGQIGAGVPQGSNLGPLLYSIFSSDMPLPYIHSPSP--------------------TERIMLSTYADDTIVLSSDILPTAATRNNENYLKTFSDWADRWGISVNASKTGHVIYTLKNDIP-T-NLKTMKIKGQAVKKESKQSYLGVILDSKLTLSPHVTKVVGKYLTAYRKMSWILNERSKLPANTKMLILKSVLSPIWQYAIAAWGPLVTDAQIRRIQVEENKKMRDICRAGR--YTKNQTI
D. simulans	Dsim_TART	TART	C	SILRLGYYPEAWKHAQVKMILKPGKSTNEPKSYRPISLLSGLSKIFERLLLKRLFKVDLFKKAIPLHQFGFRKEHGTEQQIARVTQFILEAFEKKEYCSAVFLDITEAFDRVWHEGLLLKLAKILPYNLYIILESYLTNRTFEVKDQAGETSRTGQIGAGVPQGSNLGPLLYSIFSSDMPLPYIHSPSP--------------------TERIMLSTYADDTIVLSSDILPTAATRNNENYLKTFSDWADRWGISVNASKTGHVIYTLKNDIP-T-NLKTMKIKGQAVKKESKQSYLGVILDSKLTLSPHVTKVVGKYLTAYRKMSWILNERSKLPANTKMLILKTVLSPIWQYAIAAWGPLVTDAQIRRIQVEENKKMRDICRAGR--YTKNQTI
D. simulans	Dsim\TART	TART	P	SILRLGYYPEAWKHAQVKMILKPGKSANEPRSYRPISLLSGLSKIFERLLLKRLFKVDLFKKAIPLHQFGFRKEHGSEQQIARVTQFILEAFERKEYCSAVFLDISEAFDRVWHEGLLLKLAKILPYNLYIILESYLTNRTFEVKDQAGETSRTGQIGAGVPQGSNLGPLLYSIFSSDMPLPYIYRPSP--------------------TERIMLSTYADDTIVLSSDTLATAATRNNENYLKSFSDWADKWGISVNAAKTGHVIFTLKNDLP-T-SLRTMKIKGQVIKIESKQSYLGVILDSKLTLSSHVTKLMGKYTTAYRKMTWILNRRSKLPTKTKMLILKSVLSPIWQYAIAAWGPLVTDAQIRRIQVEENRKMRDICRAGR--YTSNQTI
D. melanogaster	TART_B1_1p	TART	P	SILRLGYYPEAWKHAQVKMILKPGKSANEPRSYRPISLLSGLSKIFERLLLKRLFKVDLFKKAIPLHQFGFRKEHGSEQQIARVTQFILEAFERKEYCSAVFLDISEAFDRVWHEGLLLKLAKILPYNLYIILESYLTNRTFEVKDQAGETSRTGQIGAGVPQGSNLGPLLYSIFSSDMPLPYIYRPSP--------------------TERIMLSTYADDTIVLSSDTLATAATRNNENYLKSFSDWADKWGISVNAAKTGHVIFTLKNDLP-T-SLRTMKIKGQVIKIESKQSYLGVILDSKLTLSSHVTKLMGKYTTAYRKMTWILNRRSKLPTKTKMLILKSVLSPIWQYAIAAWGPLVTDAQIRRIQVEENRKMRDICRAGR--YTSNQTI
D. melanogaster	TART-B	TART	P	SILRLGYYPEAWKHAQVKMILKPGKSANEPRSYRPISLLSGLSKIFERLLLKRLFKVDLFKKAIPLHQFGFRKEHGSEQQIARVTQFILEAFERKEYCSAVFLDISEAFDRVWHEGLLLKLAKILPYNLYIILESYLTNRTFEVKDQAGETSRTGQIGAGVPQGSNLGPLLYSIFSSDMPLPYIYRPSP--------------------TERIMLSTYADDTIVLSSDTLATAATRNNENYLKSFSDWADKWGISVNAAKTGHVIFTLKNDLP-T-SLRTMKIKGQVIKIESKQSYLGVILDSKLTLSSHVTKLMGKYTTAYRKMTWILNRRSKLPTKTKMLILKSVLSPIWQYAIAAWGPLVTDAQIRRIQVEENRKMRDICRAGR--YTSNQTI
D. melanogaster	TART_B1	TART	P	SILRLGYYPEAWKHAQVKMILKPGKSANEPRSYRPISLLSGLSKIFERLLLKRLFKVDLFKKAIPLHQFGFRKEHGSEQQIARVTQFILEAFERKEYCSAVFLDISEAFDRVWHEGLLLKLAKILPYNLYIILESYLTNRTFEVKDQAGETSRTGQIGAGVPQGSNLGPLLYSIFSSDMPLPYIYRPSP--------------------TERIMLSTYADDTIVLSSDTLATAATRNNENYLKSFSDWADKWGISVNAAKTGHVIFTLKNDLP-T-SLRTMKIKGQVIKIESKQSYLGVILDSKLTLSSHVTKLMGKYTTAYRKMTWILNRRSKLPTKTKMLILKSVLSPIWQYAIAAWGPLVTDAQIRRIQVEENRKMRDICRAGR--YTSNQTI
D. melanogaster	Dmel\TARTB	TART	P	SILRLGYYPEAWKHAQVKMILKPGKSSNEPKSYRPISLLSGLSKMFERLLLKRLFRVDLFKKAIPLHQFGFRKEHGTEQQIARVTQFILEAFERKEYCSAVFLDISEAFDRVWHEGLLLKLAKILPYNLYIILESYLTNRTFEVKDQAGETSRTGQIGAGVPQGSNLGPLLYSIFSSDMPLPYIYRPSP--------------------TQRIMLSTYADDTIVLSSDTLATAATRNNENYLKTFSDWADKWGISVNAAKTGHVIFTLKNDLP-T-NSMNVKIKGQTIKKESKQSYLGVTLDSKLTLSSHVTKLLGKYSTAYRKLTWILNGRSKLPTKTKILILKSVLSPIWQYAIAAWGPLVTDAQIRRVQVEENRKIRDICRAGR--YTRNQTI
D. melanogaster	TART-C	TART	P	SILRLGYYPEAWKHAQVKMILKPGKSSNEPKSYRPISLLSGLSKMFERLLLKRLFRVDLFKKAIPLHQFGFRKEHGTEQQIARVTQFILEAFERKEYCSAVFLDISEAFDRVWHEGLLLKLAKILPYNLYIILESYLTNRTFEVKDQAGETSRTGQIGAGVPQGSNLGPLLYSIFSSDMPLPYIYRPSP--------------------TQRIMLSTYADDTIVLSSDTLATAATRNNENYLKTFSDWADKWGISVNAAKTGHVIFTLKNDLP-T-NSMNVKIKGQTIKKESKQSYLGVTLDSKLTLSSHVTKLLGKYSTAYRKLTWILNGRSKLPTKTKILILKSVLSPIWQYAIAAWGPLVTDAQIRRVQVEENRKIRDICRAGR--YTRNQTI
D. melanogaster	Dmel\TARTC	TART	P	SILRLGYYPEAWKHAQVKMILKPGKSSNEPKSYRPISLLSGLSKMFERLLLKRLFRVDLFKKAIPLHQFGFRKEHGTEQQIARVTQFILEAFERKEYCSAVFLDISEAFDRVWHEGLLLKLAKILPYNLYIILESYLTNRTFEVKDQAGETSRTGQIGAGVPQGSNLGPLLYSIFSSDMPLPYIYRPSP--------------------TQRIMLSTYADDTIVLSSDTLATATTRNNENYLKTFSDWADKWGISVNAAKTGHVIFTLKNDLP-T-NSMNVKIKGQTIKKEA-ASYLGVTLDSKLTLSSHVTKLLGKYSTAYRKLTWILNGRSKLPTKTKILILKSVLSPIWQYAIAAWGPLVTDAQIRRVQVEENRKIRDICRAGR--YTRNQTI
D. yakuba	Dyak\TART2	TART	P	SILRIGHYPDNWKHATVKMILKPGKSANDPKSYRPISLLSGFSKIFERLLLKRLVRIDSFKKAIPLHQFGFRKDHGAEQQIARVTQFILEAYERKEYCSAVFLDITEAFDRVWHEGLLLKLAKILPFNLYTILESYLTNRTFEVKDPTGEPSRTGQIGAGVPQGSNLGPILYSIFSSDMPIPRTHSVSP--------------------TGEMLLSTYADDTVVLSTDQLPTAAIRNNQNYLETFSDWADKWGIKVNAAKTGHVIYTLKNDLP-T-NLKTIKIRGNKIKNQNKQSYLGVILDNKLTLSSHVTKLVGKFTAAHKKLTWILSERSKLPDNTKMLIFKTILSPIWQYAIPAWGPLVTDAQIKRIQVEENLKMRKVCRAGR--FTRNQFI
D. yakuba	Dyak_TART	TART	P	SILRIGHYPDNWKHATVKMILKPGKSANDPKSYRPISLLSGFSKIFERLLLKRLVKIDSFRKAIPLHQFGFRKDHGAEQQIARVTQFILEAYERKEYCSAVFLDITEAFDRVWHEGLLLKLAKILPFNLYTILESYLTNRTFEVKDPTGEPSRTGQIGAGVPQGSNLGPILYSIFSSDMPIPRTHSVSP--------------------TGEMLLSTYADDTVVLSTDQLPTAAIRNNQNYLETFSDWADKWGIKVNAAKTGHVIYTLKNDLP-T-NLKTIKIRGNKIKNQNKQSYLGVILDNKLTLSSHVTKLVGKFTAAHKKLTWILSERSKLPDNTKMLIFKTILSPIWQYAIPAWGPLVTDAQIKRIQVEENLKMRKICRAGR--FTRNQFI
D. yakuba	Dyak\TART	TART	P	SILRIGHYPRIWKHAEIVMIPKPKKNPSHMKSYRPISLLSGLSKVFERLLLKRLLSEEAFHKAIPDHQFGFRKEHGAEQQLTRVTQFILRAYEEKQYCSAVFIDVAEAFDRVWHEGLLSKLIKILPLRLYTILENYLSGRTFAIKCNDGIKSRTGRITAGVPQGSVLGPILNTIFSSDMPLPALTHRSL------------HTNPG---PKKMLLSTYADDTAILSMGDYPAMAVQRNNNYLTQLVIWAKKWSITINPIKTAHVIFSKRRVQT-N--NIPIKIDGKQVPVKKSTIYLGVKIDSGLTMSAHVTQLRIKMWARAKKLNWLIGAGSKLAKKCKMLMIRQLIAPLWQYTLPVWGALCSNTQIKRIQGPYNKLIRCSLKAGR--YARNEAL
D. persimilis	Dper\TR3B	TR3B	P	SILRLGHYPSQWKHAAISLILKPGKDSSELSSYRPISLLSGLSKMFEKMLLRRLFEFPLFAKAIPSHQFGFRKQHGTEQQLARVTNFILEAYENQQYCSAVFIDITEAFDKVWHAGLFCKLSKILPNKMYRVLESYLSNRTFEVNSTDGSKSRQGRINAGVPQGSNLGPVLYSIYSSDMPTPEITKTGN------------AMEFRAPRVKNMMLATYADDTIILCRGEHQAWTIRDNEEFLWYFSKWAKKWAITVNTSKTAHVMFALKNLSH-ARGPIQIKFDNNIIPLSNKQTYLGVALDRKLNLLSHVNLLRGKIRTTEKRLEWILGKNSSLQKECKILLVKQLITPIWQYAIPIWGALVSDSSMQRIQTAENKVIRKAVGATR--YTRNDT-
D. rhopaloa	Drho_TART	TARTAHRE	C	SILRLGHYPSQWKHAAISLILKPGKDSSELSSYRPISLLSGLSKMFEKMLLRRLFEFPLFAKAIPSHQFGFRKQHGTEQQLARVTNFILEAYENQQYCSAVFIDITEAFDKVWHAGLFCKLSKILPNKMYRVLESYLSNRTFEVNSTDGSKSRQGRINAGVPQGSNLGPVLYSIYSSDMPTPEITKTGN------------AMEFRAPRVKNMMLATYADDTIILCRGEHQAWTIRDNEEFLWYFSKWAKKWAITVNTSKTAHVMFALKNLSH-ARGPIQIKFDNNIIPLSNKQTYLGVALDRKLNLLSHVNLLRGKIRTTEKRLEWILGKNSSLQKECKILLVKQLITPIWQYAIPIWGALVSDSSMQRIQTAENKVIRKAVGATR--YTRNDT-
D. virilis	Dvir\TR1B	TR1B	P	SILRLGYFPSKWKCAVVIMIPKPGKPQEQLNSYRPISLLSGLSKIFEHLLLRRMYESDGFIHAIPKHQFGFRSEHGADQQIGRVTQFILEAYERNQYCAATYMDIQEAFDRVWHDGLRYKLRMILPYATYNVVSHYLAERTFMVECSGGIRSSTKRIAAGVPQGSVLGPVLYTLYTADMPIPGPISPTT-------------GYVRHMYRKETLLATYADDTVILTVGRTQTDAVNRMNEYLEVLSAWATKWCITINATKTVHVMHTLRRLQM-QTDAQTAHIGGQALLNQTVHTYLGVKLDTQLQFNRHISAVINKLRTRFKKMQWLIDSTSKLPLKTKVIIYKQLIAPIWQYTLPVWGPLASQTQIDRIQTMQNKILRSIAGAPW--YVRNSTI
D. virilis	Dvir\TR1A	TR1A	P	GILRFGHFPYKWKCAKITMIQKPGKPSDQLGSYRPISLLAGFSKIFERLLLRRMFQLENIINAIPSHQFGFRREHAAEQQLGRVTQFILEAYEDNKYCSAVYMDIQEAFDRVWHDGLRFKLKQLLPEVLYRVMNSYLSERTFIVDCCGGTRSSLKEICAGVPQGSVLGPVLYTLYTSDMPLPAPL------------------------RHKLMLATYADDTAILSSANSQEDAIANLDLFLTTITTWTQKWSISINITKTKHIMHTWRNLQM-P--ILSPRILDQRLTTEERISYLGVQVDKKLLLSSHVTTIVARVRDRAKKLHWLISERSKLPLKCKVTLYKQLIAPIWQFALPVWGSLLCEGQFERIQVAQNKILRTIAGAPW--YVRNQSI
D. persimilis	Dper\TR1A	TR1A	P	SSLRIGCFPNRWKHAAVSMIPKPGKPADKLASYRPISLLSGLSKLFERLILTRMMEADGFVEAIPNHQFGFRQVHAAEHQLGRVTKFILSTYENNLYCSAIYMDIQEAFDRVWHAGLKHKMKRLLPAAIYRVLSHYLDDRSFYVECTGGVKSGNKMIAAGVPQGSVLGPVLYNLYTHDMPLPR--------------------------DRGMLLATYADDTAILATGMNQLMATNKLNRFLHSISNWAKQWGITINASKTVHIVHTLRSIQQ-PVDDLQPHIADQRISSVAVHPYLGVKLDAKLQFHTHITNVVTKVRARVQKLRWLLNTNSRLNLNTKVMLYKQMIAPIWQYTLAVWGPLASSAEFGRIQVEQNKTLRLICNAPW--YVRNDTI
D. pseudoobscura	Dpse\TR1A	TR1A	P	SSLRIGCFPNRWKHAAVSMIPKPGKPADKLASYRPISLLSGLSKLFERLILTRMMEADGFVEAIPNHQFGFRHVHAAEHQLGRVSKFILSTYENNLYCSAIYMDIQEAFDRVWHAGLKHKMKQLLPAALYRVLSHYLDDRSFYVECTGGVKSGYKKIAAGVPQGSVLGPVLYNLYTYDMPLPR--------------------------DRGMLLATYADDTAILATGMNQLMATNKLNRFLHSISNWAKKWGISINASKTVHIVHTLRTIQQ-PVDDLQPHIADQRISSVAVHSYLGVKLDAKLQFHMHITNVITKVRARVQKLRWLLNTSSKLNLNTKVMLYKQMIAPIWQYTLAVWGPLATSAEFGRIQVEQNKTLRLICNAPW--YVRNDTI
D. mojavensis	Dmoj\TR1C	TR1C	P	SALRLGHFPDRWKCAKIKMIAKPGKPAHELSSYRPISLLSGLSKIFELLIFRRLMDVQAFSESIPDHQFGFRSEHSTEQQLGRVTKFLLEAYEDGNYCSAIYLDISEAFDRVWHAGLQYKLKKLLPKALFNIIFSYLSNRLFLVECSDYAQSSVKRFAAGVPQGSVLAPILYTIYTADIPLPRVSTSRY--------------------GSRMMLGTYADDTAILSSSICPVHSILLINQYLGSLDEWTKKWCISINYTKTIHVLHSLRRVQV-DDRQAVITCAGNRIASKSSHRYLGVQLDDRLHLHTHITTLIGKLRTRSKQLNWLLNANSKLPLKIKIMFYKQLIAPIWQYALPVWGSLVTDRSFSRIQVAQNKILRSIAGAPW--YVSNDNL
D. mojavensis	Dmoj\TR1D	TR1D	P	SALRFGHFPSRWKCARVRMIVKPGKPAHELTSYRPISLLSGLSKILEKLIMNRLFEVEAFCKAMPDHQFGFRSRHSTEQQLGRVTQFIMEAFEDNYFCSAVYLDISEAFDRVWHPGLLYKLKKLLPNVLFNILHSYLKNRTFIVECFDGTRSSVKQIAAGVPQGGVLSPILYNFYTADMPLPAISSVRR-P------------------TARMMLGTYADDTAILSSNISLTHAVQHLNHYLNTFHEWTKKWCIKLNYSKTVHVIHSIRQVQY-D-HQSVVTIAGNNIDNKTSHRYLGIQLDNKLLLKTHINNIIGKLRTRTKELKWIIGARSKLPLKLKILLYKLLIAPIWQYALPIWGALICETRFNKLQVAQNKILREITGAPW--YVSNNTL
D. mojavensis	Dmoj\TR1A	TR1A	P	NSFRLGHFPSCWKLAMVKMVHKPGKPTQHVASYRPISLLSGLSKILEYLILSRMLAQDTLVNAIPSHQFGFRKAHSAEQQLGRVTQFIIKAFDDHKYCSAVYMDIKEAFDRVWHPGLKYKLKRLLPDALYRILCCYLADRTFIVECHGGCRSGIKQIHAGVPQGSLLGPILYNIYTSDIPRPTR-------------------------LRGILIATYADDVIVLSADSRQADALSQQQAYMDSLAEWASKWCITINANKTMHVMHAYRVIAP----YQAIRIGNETIENGTSHPYLGVTLDSKLRFSQHVTTVVTRVRARLKKIDWLINKDSKLTLRTKVIIYKQLVAPLWQYSLPVWGALLSESQFSRIRVVHNKALRAISGAQY--FISNSRI
D. mojavensis	Dmoj\TR1B	TR1B	P	NSFRLGHFPSCWKLAMVKMVHKPGKPTQHVSSYRPISLLSGLSKILEYLILSRMLEQDTLVNAIPSHQFGFRKAHSAEQQLGRVTQYIIKAFDDHKYCSAVYMDIKEAFDRVWHTGLKYKLKSLLPFALYRILCCYLADRSFIVECHGGCRSGVRQIHAGVPQGSLLGPVLYNIYTSDIPSPTC-------------------------LHGIRIATYADDVIVLSANYRQTDALNQQQAYMHILAEWASKWCITINANKTTHIMHSLRPIAP----YQAIRIGNETIENSTSHPYLGVTLDSRLRFTQHVTTVVTRVRARLKKIDWLVNKDSKLSMKTKTIIYKQLVAPLWQYSLPVWGALLSETQFSRIRVVHNKALRAISGAQY--FVSNTRI
D. mojavensis	Dmoj\TR1E	TR1E	P	NSLRLGHFPSRWKQALVKMIHKPGKPTHIVSSYRPISLLSGLSKILEKIILSRMMELNSVVKIIPNHQFGFRKSHSAEQQLGRVTKLILQAFEAGSYCSAVYMDIKEAFDRVWHTGLRYKLKKILPMPLMSILDSYLRERTFQVECHNGVRSDLKQINAGVPQGSILGPVLYNIYTSDIPATPLHTTH---------------------GYKTMVATYADDIIILISNLRQNIAITEQQRYLNTLEAWAKKWCITVNPAKSNHIMHTLRRVLP----YEPVKLNNIPIKNVTKHVYLGVTLDSKLHFDQHISSLEAKIKIRSNKINWLINSHSKLPLKVKVILYKQLIAPIWQYTLPVWGTLLSNSQFARLKVMQSKILRLITGAPW--HVSNETI
D. melanogaster	Dmel_Jockey	Jockey	C	SVLDVGYFPKAWKSASIIMIHKTGKTPTDVDSYRPTSLLPSLGKIMERLILNRLLTCKDVTKAIPKFQFGFRLQHGTPEQLHRVVNFALEAMENKEYAVGAFLDIQQAFDRVWHPGLLYKAKRLFPPQLYLVVKSFLEERTFHVSV-DGYKSSIKPIAAGVPQGSVLGPTLYSVFASDMPTHTPVTEVD--------------------EEDVLIATYADDTAVLTKSKSILAATSGLQEYLDAFQQWAENWNVRINAEKCANVTFANRTGSC-----PGVSLNGRLIRHHQAYKYLGITLDRKLTFSRHITNIQQAFRTKVARMSWLIAPRNKLSLGCKVNIYKSILAPCLFYGLQVYGI-AAKSHLNKIRILQAKTLRRISGAPW--YMRTRDI
D. takahashii	Jockey-1_DT_1p	Jockey_1	C	SMLRIHHFPSQWKCAVITMIPKPGKPENLVESYRPISLLPTFSKIFERIILSRILGVRSVQDAIPDHQFGFRNHHGTPEQAHRLVQHILNAFENKQYSSAIFLDVKEAFDRVWHEGLLHKLKTLLPTGLFLVLKSYLLDRSFMVEV-RGERSSLRFSRAGVPQGSVLGPVLYTLFTSDLPSIN--------------------------APDTLLATYADDTAFLVNSTCRIEASRITQEFLDSYGKWTNRWNIAINGRKSQHCNFTLRGQIL-----PTVELHSTTIPQSPQAQYLGLILDKRLTWKQHTTKIAATCRAKLRKLNWMLKSTSKLSLANKVLLFKTIVVPSMTYCIQLWGV-ASDSNVMKVQRVQNKALRTITNAPW--YVRNVDL
D. ficusphila	Jockey-3_DF_2p	Jockey_3	C	SMLRIQHFPSQWKCAVITMIPKPGKPENLVESYRPISLLPTFSKIFERIFLSRIMGVRSVQAAIPDHQFGFRHRHGTPEQAHRVVNHILNAFENKQYCSAIFLDVKEAFDRVWHYGLLHKLKSLLPTGQFLLLKSYLLDRSFMVEV-RGERSSIRFARAGVPQGSVLGPVLYTLFTSDLPSSV--------------------------EPGTLLATYADDTAFLVNSSCRIEASRITQEFLDSYGKWANRWNIAINGRKSQHCNFTLRGKVL-----PRVELHDVTIPQSPQAQYLGLILEKRLTWKEHTKKITATCRSKLRKLNWLLKPTSKLSLGNKVLLYKSIVMPSITYCIQIWGM-ASDTNVMKVQRTQNRALRMMANAPW--YVRNDAL
D. ananassae	Jockey-6_DAn_2p	Jockey_6	C	XMLRIHHFPSQWKCAVITMIPKPGKPENLVESYRPISLLPTFSKIFERIFLSRIMGVRSVQVAIPDHQFGFRHRHGTPEQAHRVVNHILKAFENKQYCSAIFLDVKEAFDRVWHLGLLHKLKSLLPTGQFLLLKSYLLDRSFMVEV-RGERSSIRLARAGVPQGSVLGPVLYTLFTSDLPSLV--------------------------EPGTLLATYADDTAVLVNSSCRVEASRITQEFLDSYGKWANRWNIAINSRKSQHCSFTLRAKTL-----PRVELHDVTIPQSPQAQYLGLILDKRLTWKEQTKKITATCRSKLRKLNWLLKPTSKLSLGNKVLLYKSIVLPSIIYCIQIWGM-ASDTNVMKVQRTQNRALRMMANAPW--YVRNDAL
D. rhopaloa	Jockey-6_DRh_2p	Jockey_6	C	SMLRIHHFPSQWKCAVITMIPKPGKPENLVESYRPISLLPTFSKIFERIFLSRIMGVRSVQDAIPDHQFGFRHHHGTPEQAHRVVQHILNAFENKQYSSAIFLDVKEAFDRVWHAGLLHKLKSLLPTGQFLLLKSYLLDRSFMVEV-RGERSSIRTARAGVPQGSVLGPIMYTLYTSDLPCPT--------------------------QPGTLLATYADDTAFLVNSSCRVEASRITQDFLDLYGKWTNRWNIAINGRKSQHCNFTLRGKVL-----PRVELHHITIPQSPQAQYLGLILDKRLTWKGHIQKIAATCRTKLRKLNWMLKPTSKLSLGNKVLLYKSIVVPSMTYCIQLWGM-ASDSNVAKVQRVQNRALRRIANAPW--YIRNDAL
D. takahashii	Jockey-2_DT_1p	Jockey_2	C	AMIVLSYYPEQWKHANVVMIPKKGVXPRCADSFRPISLLPTFSKIFERILLKRLFSVHMFQDAIPNHQFGFRSLHNAAEQMHRVVNHILKAFEAKKYCCAVFLDVKQAFDRVWHCGLLYKLKPILPPTYFDLLRSFLIGRTFQVDV-RGSKSASRPILAGVPQGSVLGPVLYTIFTSDLPSPR--------------------------GRNVLTATYADDTAFLATSALRREATDMVQDMLNEFEAWASRWNIAVNPAKSQHATFSLNRLNT-----YRLTLDGTPIKHSDTVKYLGLTLDRRLTWKQHIVATCASVRQKAGKMRWLLRPGSGLSITAKTRLFKATLMPSLHWGIHFWGT-ACNTSIKRIESCQSKILRHMINAPY--YTRNTTI
D. takahashii	Jockey-6_DTa_2p	Jockey_6	C	ASLNLGHFPSPWKSALVTMVPKKGKDPCSPESYRPISLLSTFSKIFERIVLNRLLDIDTFNDALPNHQFGFRSRHSAVEQVHRVVNHILDALEGHKYCSAVFLDVRQAFDRVWHEGLFYKLMPLLPEGLWKLIVSFLDHRMFAVDI-RGHLSGLRLIRAGVPQGSVLGPVLYTIYTSDLPNPV--------------------------VRGTLLATYADDTAFLATGSTPSSASWRVQTFLNEFECWASRWNIALNVDKTQHATFALRPGRS-----RSLYLDGDRLKHEQRVTYLGVTLDRRLCWKGQIDRVCGSARTKLDKMDWLLRSDSGLSLQAKVRLFKAIVLPTLNWGITCWGT-ACDTSLRRVQTCITKALRRMLGVKWHHYVENSVL
D. ficusphila	Jockey-1_DF_1p	Jockey_1	C	GIISLGYYPKKWKKSIIIMIPKPGKDHTIPSSYRPISLLSCLSKLFEKCLLTRILPYMGAHNIIPAHQFGFREKHGTIEQVNRITSEIRTAFEHREYCSAIFLDVSQAFDRVWLNGLMHKIKTHFPGYTHKLLESYLYNRVFAVRC-NTTTSENYKIEAGVPQGSALGPTLFVLYTADIPT----------------------------SDRLLTSTFADDTAILSRSRCPVRATSQLANHLTVVEKWLSDWRIKINEQKCKHVTFTLNRQTC-----PPIYLNSTQIPQVNEVTYLGVHLDRRLTWRRHIECKKLHLKLKASSLHWIINARSPMCLDYKVLLYNSTLKPIWTYGSQLWGN-ASKTNIDIIQRAQAKILRTITGAPW--YIRNENI
D. elegans	Jockey-2_DEl_1p	Jockey_2	C	GITRLGYFPKKWKKSVIIMIPKPGKDHTIPASYRPISLLSCLSKLLEKCLLTRIIPYLKEHNVIPAHQFGFRESHGTIEQVNRLTTEIRTAFEFREYCSAVFLDVAQAFDRVWLDGLMHKIRTLLPENTHRILESYLYNRAFAVRC-NTTISDDYTIEAGVPQGSALGPTLFLLYTADIPT----------------------------NERLTTSTFADDTAILSRSKCPIQATALLADHLVVVERWLSDWRIKINAQKCKHITFTLNRQTC-----PPLTLNNTPLPQADDVTYLGVHLDRRLTWRRHIEAKKIHLKLKSNSLHWLINARSPLCPDFKVLLYNSTLKPVWTYGSQLWGN-ASSSNIDIIQRAQSKILRTITGAPW--YVRNDNI
D. rhopaloa	Jockey-4_DRh_2p	Jockey_4	C	GITKLGYYPKKWKKSVVIMIPKPGKDHTIPSSYRPISLLSCLSKLLEKCLLTRITPYLREQNLIPAHQFGFRESHGTIEQVNRITSEIRTAFEHREYCSAIFLDVSQAFDRVWLEGLMHKIITLLPENTHKLLKSYLYHRVFEVRC-NTTTSNEYNIEAGVPQGSALGPTLFVLYTADIPT----------------------------NERLTTSTFADDTAILSRSRCPTRATAQLADHLVVVEKWLSDWRIKINEQKCKHITFTLNRQSC-----PPLTLNSTQIPQASDVTYLGVHLDRRLTWRRHIECKKVHLRLKASSLHWIINSRSPLCLDFKVLLYNSTLKPIWTYGSQLWGN-ASNSNVDIIQRSQSKILRTITGAPW--YVRNENI
D. elegans	Jockey-5_DEl_2p	Jockey_5	C	AIAKHGHFPKRWKKSIIIMISKPGKDPTIPTSYRPISLLSCLSKLFEKCILTRINTYLRIQNGIPSHQFGFREKHGTIEQVNRITSEIRNAFEKREYCTAIFLDVSQAFDRVWLEGLMYKIKTMLPSNTHKLLESYLHDRKFAVRC-NTAISDDFSILAGVPQGSVLGPTLYVLYTADIPT----------------------------SSRLTTSTFADDTAILSRSKCPIQATAQLALHLADVEKWLSDWRIKVNEQKCKHVTFTLNRQNC-----PPLTLNNTLLPQSNEVTYLGVHLDRRLTWRRHIEAKRTHLKLKASSLHWLINARSSLSLDYKVLLYNSVLKPIWTYGSQLWGY-ASNSNIDIIQRAQSKILRTITGAPW--YVRNENI
D. ficusphila	Jockey-7_DF_2p	Jockey_7	C	AMTRLGCFPKRWKKSIIIMIPKPGKDHTLASSYRPISLLSCLSKLFEKCLLTRIIPYFRRHNIIPAHQFGFREKHGTIEQVNRITSEIRSAFENREYCTAVFLDVSQAFDRVWLDGLMHKIKIMLPNSTHKLLKSYLYNRIFVVRC-NTSISAERNIEAGVPQGSVLGPTLYLLYTSDIPT----------------------------SSQLTMSTFADDTAILSRSRCPQQASAQLAAHLEVVEKWLSDWRIKVNEQKCKQVTFTLNRRNC-----PNLTLNNIVLPQSDDVTYLGVHLDRRLTWRTHIEAKRTHLRLKANSLHWLINSRSPLSLDYKVLIYNTVLKPIWTYGSQLWGS-ASNSNVEIVQRAQAKILRIITGAPW--YVRSVNI
D. rhopaloa	Jockey-2_DRh_2p	Jockey_2	C	SILKWGYFPDQWKKSVITMIPKPGKDKSQPSSYRPISLLPCLSKLFEKLLLVHLVTHLQNNRTIPLHQFGFREKHGTIEQVNRLTSEIRTAFEHKQYCSALFLDVSQAFDRVWIDGLVYKIKTLLPENTHKLLESYLRNRVFTVRC-KTFTSTIRNIEAGVPQGSVLGPILYILYTADIPT----------------------------SRQTLISTFADDTAIVSRSKCPKTATAHLKEHLVAVEKWLADWRIKVNEQKCKHITFTLNLSKC-----PPLALNNKPVPQADEVTYLGIHLDRRLTWRKHIEAKKTHLKLKASSLHWLMNYRSPLPLEYKVLLYNSCLKPIWTYGSELWGN-ASSSNIEIIQRVQSKTLRTITGAPW--YIRNANI
D. ficusphila	Jockey-4_DF_2p	Jockey_4	C	SILKWGYFPLQWKKSVITMIPKPGKDKSQPSSYRPISLLPCLSKLFEKLLSCHLRTHLQNNRAIPLHQFGFREKHGTIEQVNRITAEIRTAFEYREYCSAIFLDVSQAFDRVWIEGLVYKIKTVLPQNTHKLLESYLKDRVFTVRC-KNFFSENHKIKAGVPQGSVLGPILYVLYTADIPT----------------------------SSQTILSTFADDTAIISRSKYPKTATAHLKNHLTDVEKWFADWRIQVNDQKCKHITFTLNRETC-----PPLSLNNKQIPQVNEVTYLGIHLDRRLTWRRHIEAKKTSLKLKANSFHWLINPRSPLPLEYKVLLYNSCLKPTWTYGSELWGN-ASSSNIEIIQRVQSKILRTITGAPW--YIRNANI
D. elegans	Jockey-6_DEl_2p	Jockey_6	C	SILKWGYFPTQWKKSVITMIPKPGKDKSQPSSYRPISLLPCLSKLFEKLLLCHLRTHLQNDRAIPLHQFGFREKHGTTEQVNRITAEIRTAFECREYCSALFLDVSQAFDRVWIDGLVHKIKTVLPQNTHKLLESYLKDRVFTVRC-KXFFSANHKIEAGVPQGSVLGPILYVLYTADIPT----------------------------SSQTTLSTFADDTAITSRSKCPKTATAYLKNHLGAVEKWLADWRIQVNEQKCKHITFTLNRATC-----PPLALNNKQIPQVDEVTYLGIHLDRRLTWRKHIEAKKISLKLKANSFHWLINSRSPLPLELKVVIYNSCLKPTWMYGSELWGN-ASSSNIEIIQRIQSKILRTITGAPW--YIRNANI
D. ficusphila	Jockey-8_DF_2p	Jockey_8	C	SMMKWGYYPQQWKKSVITMIHKAGKDKSQPSSYRPISLLPCLSKIFEKLLLNRIKXHLQSHNAIPSHQFGFREKHGTIEQVNRITAEIRNTFESREYCSAVFLDVAQAFDRVWLDGLIYKIQNLLPQNTHKILESYLVHRSFAVRC-KVKLSDYHPIEAGVPQGSVLGPTLYIIYTADLPT----------------------------TGLTITSTFADDTAILSRSKCPMRATQNLSAHLGLLEKWLADWRIKVNEQKCKHVTFTLNRQTC-----PPPSLNNIHIPQTTEVTYLGVHLDRRLTWRRHIEAKRTQLKLKARSLHWLINARSPLKLEYKVLLYNVVLKPIWKYGSELWGN-ACVSNLEVIQRAQSKILRTITGA-----------
D. ficusphila	Jockey-2_DF_1p	Jockey_2	C	AVIRLKFFPSTWKIAQITAIPKPHKSAALVSSYRPISLLPILSKIFEKILLDRINPILIEQNVIPPHQFGFRKKHSTVQQVHRVINKISEDFDNKKVCVAVYMDIAKAFDKVWHTGLLHKLHNILPLNLFTILKSYLTNRYFYIKC-DDECSDLMPVAAGVPQGSVLGPILYLIYTADIPNPL--------------------------THGSMIATFADDTVLMASSYTEKRAANTLQEILTTTMSWFEKWGIEINKDKTQQVVYTKKKITT----PTRIKIDDEILKLSTSAKYLGLTIDSKLTWKKHIINKRNEVKSKFRQLHWLLGRQSNLNVSNKLLIYKTIIRPIWTYGIEIWGT-ASKSNLIIIQRAQSKILRIITNSDR--YTTNDHI
