# Supplementary material for: Diversification and collapse of a telomere elongation mechanism
Source: HighWire-hosted journal article supplement (doi:10.1101/gr.245001.118), 2019-05-28
Supplement: Supplemental_Table_S5.xlsx [file Supplemental_Table_S5.xlsx]

## Sheet: 2R
Table S5. Repbase annotation of two telomeres from D. melanogaster long read-assembled genome.
Telomeric_Contig	start_position_on_contig	end_position_on_contig	TE	start_position_on_TE	end_position_on_TE	TE_Class	Sense(direct or complentary)	Identity_to_Repbase_consensus
utg_2569/0_15951256|quiver:15877191-15963222	398	480	Polinton-2_HM	9767	9843	DNA/Polinton	c	0.7407
utg_2569/0_15951256|quiver:15877191-15963222	1231	1277	MER4I	4247	4293	LTR	d	0.8478
utg_2569/0_15951256|quiver:15877191-15963222	1310	1603	DNAREP1_DM	226	573	DNA/Helitron	c	0.8
utg_2569/0_15951256|quiver:15877191-15963222	1610	1638	Helitron-1_DEu	1	29	DNA/Helitron	c	0.9655
utg_2569/0_15951256|quiver:15877191-15963222	1683	1779	Ginger1-1N4B_OT	498	595	DNA/Ginger1	d	0.74
utg_2569/0_15951256|quiver:15877191-15963222	1833	1922	Polinton-2_HM	22998	23079	DNA/Polinton	d	0.7529
utg_2569/0_15951256|quiver:15877191-15963222	2047	2086	Helitron-1_DEu	1	40	DNA/Helitron	c	0.95
utg_2569/0_15951256|quiver:15877191-15963222	2140	2280	Gypsy-5_CP-LTR	81	216	LTR/Gypsy	c	0.7194
utg_2569/0_15951256|quiver:15877191-15963222	2749	2797	piggyBac-N5_DR	1122	1172	DNA/piggyBac	d	0.78
utg_2569/0_15951256|quiver:15877191-15963222	2854	2950	DNAREP1_DM	94	188	DNA/Helitron	d	0.8511
utg_2569/0_15951256|quiver:15877191-15963222	2954	3069	DNAREP1_DM	1	121	DNA/Helitron	c	0.9231
utg_2569/0_15951256|quiver:15877191-15963222	3070	3674	DNAREP1_DSim	38	692	DNA/Helitron	c	0.7287
utg_2569/0_15951256|quiver:15877191-15963222	5133	5342	DNAREP1_DSim	460	672	DNA/Helitron	c	0.8113
utg_2569/0_15951256|quiver:15877191-15963222	5357	5508	Mariner-N40_LSal	433	581	DNA/Mariner	d	0.7676
utg_2569/0_15951256|quiver:15877191-15963222	5533	5580	ISL2EU-2_HM	2850	2897	DNA/ISL2EU	d	0.8125
utg_2569/0_15951256|quiver:15877191-15963222	5603	5658	HETRP_DM	831	883	Interspersed_Repeat	d	0.8148
utg_2569/0_15951256|quiver:15877191-15963222	5965	6097	HETRP_DM	949	1084	Interspersed_Repeat	d	0.8433
utg_2569/0_15951256|quiver:15877191-15963222	6549	6744	DNAREP1_DSim	35	240	DNA/Helitron	d	0.9137
utg_2569/0_15951256|quiver:15877191-15963222	6757	6903	DNAREP1_DSim	458	608	DNA/Helitron	c	0.8
utg_2569/0_15951256|quiver:15877191-15963222	7022	7109	HETRP_DM	13	101	Interspersed_Repeat	d	0.8202
utg_2569/0_15951256|quiver:15877191-15963222	7181	7231	HETRP_DM	831	878	Interspersed_Repeat	d	0.8163
utg_2569/0_15951256|quiver:15877191-15963222	7668	7737	Ginger1-10_HM	3430	3496	DNA/Ginger1	d	0.8116
utg_2569/0_15951256|quiver:15877191-15963222	8447	9476	HETRP_DM	130	1088	Interspersed_Repeat	c	0.9364
utg_2569/0_15951256|quiver:15877191-15963222	9596	10127	HETRP_DM	411	945	Interspersed_Repeat	c	0.9506
utg_2569/0_15951256|quiver:15877191-15963222	10132	10242	HETRP_DM	130	235	Interspersed_Repeat	c	0.9074
utg_2569/0_15951256|quiver:15877191-15963222	10362	10893	HETRP_DM	411	945	Interspersed_Repeat	c	0.9506
utg_2569/0_15951256|quiver:15877191-15963222	10898	11008	HETRP_DM	130	235	Interspersed_Repeat	c	0.9074
utg_2569/0_15951256|quiver:15877191-15963222	11128	11659	HETRP_DM	411	945	Interspersed_Repeat	c	0.9506
utg_2569/0_15951256|quiver:15877191-15963222	11664	11774	HETRP_DM	130	235	Interspersed_Repeat	c	0.9074
utg_2569/0_15951256|quiver:15877191-15963222	11894	12425	HETRP_DM	411	945	Interspersed_Repeat	c	0.9506
utg_2569/0_15951256|quiver:15877191-15963222	12430	12540	HETRP_DM	130	235	Interspersed_Repeat	c	0.9074
utg_2569/0_15951256|quiver:15877191-15963222	12660	13191	HETRP_DM	411	945	Interspersed_Repeat	c	0.9506
utg_2569/0_15951256|quiver:15877191-15963222	13196	13306	HETRP_DM	130	235	Interspersed_Repeat	c	0.9074
utg_2569/0_15951256|quiver:15877191-15963222	13426	13957	HETRP_DM	411	945	Interspersed_Repeat	c	0.9506
utg_2569/0_15951256|quiver:15877191-15963222	13962	14072	HETRP_DM	130	235	Interspersed_Repeat	c	0.9074
utg_2569/0_15951256|quiver:15877191-15963222	14192	14723	HETRP_DM	411	945	Interspersed_Repeat	c	0.9506
utg_2569/0_15951256|quiver:15877191-15963222	14728	14838	HETRP_DM	130	235	Interspersed_Repeat	c	0.9074
utg_2569/0_15951256|quiver:15877191-15963222	14958	15489	HETRP_DM	411	945	Interspersed_Repeat	c	0.9506
utg_2569/0_15951256|quiver:15877191-15963222	15494	15604	HETRP_DM	130	235	Interspersed_Repeat	c	0.9074
utg_2569/0_15951256|quiver:15877191-15963222	15724	16255	HETRP_DM	411	945	Interspersed_Repeat	c	0.9506
utg_2569/0_15951256|quiver:15877191-15963222	16260	16370	HETRP_DM	130	235	Interspersed_Repeat	c	0.9074
utg_2569/0_15951256|quiver:15877191-15963222	16490	17021	HETRP_DM	411	945	Interspersed_Repeat	c	0.9506
utg_2569/0_15951256|quiver:15877191-15963222	17026	17136	HETRP_DM	130	235	Interspersed_Repeat	c	0.9074
utg_2569/0_15951256|quiver:15877191-15963222	17256	17787	HETRP_DM	411	945	Interspersed_Repeat	c	0.9506
utg_2569/0_15951256|quiver:15877191-15963222	17792	17902	HETRP_DM	130	235	Interspersed_Repeat	c	0.9074
utg_2569/0_15951256|quiver:15877191-15963222	18022	18553	HETRP_DM	411	945	Interspersed_Repeat	c	0.9506
utg_2569/0_15951256|quiver:15877191-15963222	18558	18668	HETRP_DM	130	235	Interspersed_Repeat	c	0.9074
utg_2569/0_15951256|quiver:15877191-15963222	18788	19319	HETRP_DM	411	945	Interspersed_Repeat	c	0.9506
utg_2569/0_15951256|quiver:15877191-15963222	19324	19434	HETRP_DM	130	235	Interspersed_Repeat	c	0.9074
utg_2569/0_15951256|quiver:15877191-15963222	19554	20085	HETRP_DM	411	945	Interspersed_Repeat	c	0.9506
utg_2569/0_15951256|quiver:15877191-15963222	20090	20200	HETRP_DM	130	235	Interspersed_Repeat	c	0.9074
utg_2569/0_15951256|quiver:15877191-15963222	20320	20851	HETRP_DM	411	945	Interspersed_Repeat	c	0.9506
utg_2569/0_15951256|quiver:15877191-15963222	20856	20966	HETRP_DM	130	235	Interspersed_Repeat	c	0.9074
utg_2569/0_15951256|quiver:15877191-15963222	21086	21617	HETRP_DM	411	945	Interspersed_Repeat	c	0.9487
utg_2569/0_15951256|quiver:15877191-15963222	21622	21732	HETRP_DM	130	235	Interspersed_Repeat	c	0.9074
utg_2569/0_15951256|quiver:15877191-15963222	21852	22383	HETRP_DM	411	945	Interspersed_Repeat	c	0.9506
utg_2569/0_15951256|quiver:15877191-15963222	22388	22498	HETRP_DM	130	235	Interspersed_Repeat	c	0.9074
utg_2569/0_15951256|quiver:15877191-15963222	22618	23149	HETRP_DM	411	945	Interspersed_Repeat	c	0.9506
utg_2569/0_15951256|quiver:15877191-15963222	23154	23264	HETRP_DM	130	235	Interspersed_Repeat	c	0.9074
utg_2569/0_15951256|quiver:15877191-15963222	23384	23915	HETRP_DM	411	945	Interspersed_Repeat	c	0.9506
utg_2569/0_15951256|quiver:15877191-15963222	23920	24030	HETRP_DM	130	235	Interspersed_Repeat	c	0.9074
utg_2569/0_15951256|quiver:15877191-15963222	24150	24681	HETRP_DM	411	945	Interspersed_Repeat	c	0.9506
utg_2569/0_15951256|quiver:15877191-15963222	24686	24796	HETRP_DM	130	235	Interspersed_Repeat	c	0.9074
utg_2569/0_15951256|quiver:15877191-15963222	24916	25447	HETRP_DM	411	945	Interspersed_Repeat	c	0.9506
utg_2569/0_15951256|quiver:15877191-15963222	25452	25562	HETRP_DM	130	235	Interspersed_Repeat	c	0.9074
utg_2569/0_15951256|quiver:15877191-15963222	25682	25887	HETRP_DM	724	945	Interspersed_Repeat	c	0.9194
utg_2569/0_15951256|quiver:15877191-15963222	25891	26831	HETA	5119	6081	NonLTR/Jockey	c	0.8855
utg_2569/0_15951256|quiver:15877191-15963222	26834	32916	HETA	1	6081	NonLTR/Jockey	c	0.9373
utg_2569/0_15951256|quiver:15877191-15963222	34090	35950	TAHRE	7147	9014	NonLTR/Jockey	c	0.9914
utg_2569/0_15951256|quiver:15877191-15963222	37054	42123	TAHRE	3938	9014	NonLTR/Jockey	c	0.9925
utg_2569/0_15951256|quiver:15877191-15963222	42124	47967	HETA	97	6078	NonLTR/Jockey	c	0.8179
utg_2569/0_15951256|quiver:15877191-15963222	49169	53813	HETA	1	4464	NonLTR/Jockey	c	0.8182
utg_2569/0_15951256|quiver:15877191-15963222	53867	54989	HETA	4990	6080	NonLTR/Jockey	c	0.833
utg_2569/0_15951256|quiver:15877191-15963222	54999	55041	HETA	5027	5075	NonLTR/Jockey	c	0.8409
utg_2569/0_15951256|quiver:15877191-15963222	55050	57667	HETA	3241	6080	NonLTR/Jockey	c	0.7908
utg_2569/0_15951256|quiver:15877191-15963222	57668	59703	HETA	3795	6081	NonLTR/Jockey	c	0.7761
utg_2569/0_15951256|quiver:15877191-15963222	59704	61709	HETA	3808	6065	NonLTR/Jockey	c	0.7748
utg_2569/0_15951256|quiver:15877191-15963222	61719	67755	HETA	1	6081	NonLTR/Jockey	c	0.938
utg_2569/0_15951256|quiver:15877191-15963222	69044	73698	HETA	1	4464	NonLTR/Jockey	c	0.8174
utg_2569/0_15951256|quiver:15877191-15963222	73748	79694	HETA	1	6081	NonLTR/Jockey	c	0.8181
utg_2569/0_15951256|quiver:15877191-15963222	79697	80044	HETA	1	356	NonLTR/Jockey	c	0.9544
utg_2569/0_15951256|quiver:15877191-15963222	80135	81893	HETA	4385	6079	NonLTR/Jockey	c	0.7988
utg_2569/0_15951256|quiver:15877191-15963222	83261	85634	HETA	2128	4464	NonLTR/Jockey	c	0.8159
utg_2569/0_15951256|quiver:15877191-15963222	85636	86031	TART-A	15175	15574	NonLTR/Jockey	c	0.99

## Sheet: 3L
Table S5. Repbase annotation of two telomeres from D. melanogaster.
Telomeric_Contig	start_position_on_contig	end_position_on_contig	TE	start_position_on_TE	end_position_on_TE	TE_Class	Sense(direct or complentary)	Identity_to_Repbase_consensus
utg_2539/0_24622056|quiver:1-46351	1	1258	TAHRE	9200	10457	NonLTR/Jockey	d	0.9968
utg_2539/0_24622056|quiver:1-46351	1293	3219	HETA	3830	6078	NonLTR/Jockey	d	0.765
utg_2539/0_24622056|quiver:1-46351	3220	6293	HETA	2709	6081	NonLTR/Jockey	d	0.7644
utg_2539/0_24622056|quiver:1-46351	6345	6425	TAHRE	7346	7435	NonLTR/Jockey	d	0.759
utg_2539/0_24622056|quiver:1-46351	6442	8182	HETA	4103	6081	NonLTR/Jockey	d	0.829
utg_2539/0_24622056|quiver:1-46351	8215	8245	Ginger1-1_DR	3916	3946	DNA/Ginger1	c	0.9355
utg_2539/0_24622056|quiver:1-46351	8246	10552	HETA	3839	6081	NonLTR/Jockey	d	0.9304
utg_2539/0_24622056|quiver:1-46351	10578	11093	TART-A	1192	1694	NonLTR/Jockey	d	0.7736
utg_2539/0_24622056|quiver:1-46351	11120	11412	TART-A	1202	1461	NonLTR/Jockey	d	0.6914
utg_2539/0_24622056|quiver:1-46351	11420	12543	TART-A	1836	2920	NonLTR/Jockey	d	0.6972
utg_2539/0_24622056|quiver:1-46351	12544	12807	TART_B1	582	864	NonLTR/Jockey	d	0.7593
utg_2539/0_24622056|quiver:1-46351	12859	12977	TART_B1	762	864	NonLTR/Jockey	d	0.781
utg_2539/0_24622056|quiver:1-46351	12991	13755	TART_B1	9742	10529	NonLTR/Jockey	d	0.7853
utg_2539/0_24622056|quiver:1-46351	13770	16076	HETA	3839	6081	NonLTR/Jockey	d	0.9304
utg_2539/0_24622056|quiver:1-46351	16102	16617	TART-A	1192	1694	NonLTR/Jockey	d	0.7736
utg_2539/0_24622056|quiver:1-46351	16644	16936	TART-A	1202	1461	NonLTR/Jockey	d	0.6914
utg_2539/0_24622056|quiver:1-46351	16944	18067	TART-A	1836	2920	NonLTR/Jockey	d	0.6972
utg_2539/0_24622056|quiver:1-46351	18068	18331	TART_B1	582	864	NonLTR/Jockey	d	0.7593
utg_2539/0_24622056|quiver:1-46351	18383	18501	TART_B1	762	864	NonLTR/Jockey	d	0.781
utg_2539/0_24622056|quiver:1-46351	18515	19279	TART_B1	9742	10529	NonLTR/Jockey	d	0.7853
utg_2539/0_24622056|quiver:1-46351	19310	19470	HETRP_DM	1516	1675	Interspersed_Repeat	d	0.8086
utg_2539/0_24622056|quiver:1-46351	19523	19576	HETRP_DM	1580	1632	Interspersed_Repeat	d	0.7778
utg_2539/0_24622056|quiver:1-46351	19624	19719	HETRP_DM	1519	1634	Interspersed_Repeat	d	0.7917
utg_2539/0_24622056|quiver:1-46351	19768	19928	HETRP_DM	1516	1675	Interspersed_Repeat	d	0.8086
utg_2539/0_24622056|quiver:1-46351	19981	20034	HETRP_DM	1580	1632	Interspersed_Repeat	d	0.7778
utg_2539/0_24622056|quiver:1-46351	20082	20177	HETRP_DM	1519	1634	Interspersed_Repeat	d	0.7917
utg_2539/0_24622056|quiver:1-46351	20226	20386	HETRP_DM	1516	1675	Interspersed_Repeat	d	0.8086
utg_2539/0_24622056|quiver:1-46351	20439	20492	HETRP_DM	1580	1632	Interspersed_Repeat	d	0.7778
utg_2539/0_24622056|quiver:1-46351	20540	20635	HETRP_DM	1519	1634	Interspersed_Repeat	d	0.7917
utg_2539/0_24622056|quiver:1-46351	20684	20844	HETRP_DM	1516	1675	Interspersed_Repeat	d	0.8086
utg_2539/0_24622056|quiver:1-46351	20897	20950	HETRP_DM	1580	1632	Interspersed_Repeat	d	0.7778
utg_2539/0_24622056|quiver:1-46351	20998	21093	HETRP_DM	1519	1634	Interspersed_Repeat	d	0.7917
utg_2539/0_24622056|quiver:1-46351	21142	21302	HETRP_DM	1516	1675	Interspersed_Repeat	d	0.8086
utg_2539/0_24622056|quiver:1-46351	21355	21408	HETRP_DM	1580	1632	Interspersed_Repeat	d	0.7778
utg_2539/0_24622056|quiver:1-46351	21456	21551	HETRP_DM	1519	1634	Interspersed_Repeat	d	0.7917
utg_2539/0_24622056|quiver:1-46351	21600	21760	HETRP_DM	1516	1675	Interspersed_Repeat	d	0.8086
utg_2539/0_24622056|quiver:1-46351	21813	21866	HETRP_DM	1580	1632	Interspersed_Repeat	d	0.7778
utg_2539/0_24622056|quiver:1-46351	21914	22009	HETRP_DM	1519	1634	Interspersed_Repeat	d	0.7917
utg_2539/0_24622056|quiver:1-46351	22058	22218	HETRP_DM	1516	1675	Interspersed_Repeat	d	0.8086
utg_2539/0_24622056|quiver:1-46351	22271	22324	HETRP_DM	1580	1632	Interspersed_Repeat	d	0.7778
utg_2539/0_24622056|quiver:1-46351	22372	22467	HETRP_DM	1519	1634	Interspersed_Repeat	d	0.7917
utg_2539/0_24622056|quiver:1-46351	22516	22676	HETRP_DM	1516	1675	Interspersed_Repeat	d	0.8086
utg_2539/0_24622056|quiver:1-46351	22729	22782	HETRP_DM	1580	1632	Interspersed_Repeat	d	0.7778
utg_2539/0_24622056|quiver:1-46351	22830	22925	HETRP_DM	1519	1634	Interspersed_Repeat	d	0.7917
utg_2539/0_24622056|quiver:1-46351	22974	23134	HETRP_DM	1516	1675	Interspersed_Repeat	d	0.8086
utg_2539/0_24622056|quiver:1-46351	23187	23240	HETRP_DM	1580	1632	Interspersed_Repeat	d	0.7778
utg_2539/0_24622056|quiver:1-46351	23288	23383	HETRP_DM	1519	1634	Interspersed_Repeat	d	0.7917
utg_2539/0_24622056|quiver:1-46351	23432	23592	HETRP_DM	1516	1675	Interspersed_Repeat	d	0.8086
utg_2539/0_24622056|quiver:1-46351	23645	23698	HETRP_DM	1580	1632	Interspersed_Repeat	d	0.7778
utg_2539/0_24622056|quiver:1-46351	23746	23841	HETRP_DM	1519	1634	Interspersed_Repeat	d	0.7917
utg_2539/0_24622056|quiver:1-46351	23890	24050	HETRP_DM	1516	1675	Interspersed_Repeat	d	0.8086
utg_2539/0_24622056|quiver:1-46351	24103	24156	HETRP_DM	1580	1632	Interspersed_Repeat	d	0.7778
utg_2539/0_24622056|quiver:1-46351	24204	24299	HETRP_DM	1519	1634	Interspersed_Repeat	d	0.7917
utg_2539/0_24622056|quiver:1-46351	24348	24508	HETRP_DM	1516	1675	Interspersed_Repeat	d	0.8086
utg_2539/0_24622056|quiver:1-46351	24561	24614	HETRP_DM	1580	1632	Interspersed_Repeat	d	0.7778
utg_2539/0_24622056|quiver:1-46351	24662	24757	HETRP_DM	1519	1634	Interspersed_Repeat	d	0.7917
utg_2539/0_24622056|quiver:1-46351	24806	24966	HETRP_DM	1516	1675	Interspersed_Repeat	d	0.8086
utg_2539/0_24622056|quiver:1-46351	25019	25072	HETRP_DM	1580	1632	Interspersed_Repeat	d	0.7778
utg_2539/0_24622056|quiver:1-46351	25120	25215	HETRP_DM	1519	1634	Interspersed_Repeat	d	0.7917
utg_2539/0_24622056|quiver:1-46351	25264	25424	HETRP_DM	1516	1675	Interspersed_Repeat	d	0.8086
utg_2539/0_24622056|quiver:1-46351	25477	25530	HETRP_DM	1580	1632	Interspersed_Repeat	d	0.7778
utg_2539/0_24622056|quiver:1-46351	25578	25673	HETRP_DM	1519	1634	Interspersed_Repeat	d	0.7812
utg_2539/0_24622056|quiver:1-46351	25722	25882	HETRP_DM	1516	1675	Interspersed_Repeat	d	0.8086
utg_2539/0_24622056|quiver:1-46351	25935	25988	HETRP_DM	1580	1632	Interspersed_Repeat	d	0.7778
utg_2539/0_24622056|quiver:1-46351	26039	26137	HETRP_DM	1519	1634	Interspersed_Repeat	d	0.7835
utg_2539/0_24622056|quiver:1-46351	26187	26347	HETRP_DM	1516	1675	Interspersed_Repeat	d	0.8086
utg_2539/0_24622056|quiver:1-46351	26400	26453	HETRP_DM	1580	1632	Interspersed_Repeat	d	0.7778
utg_2539/0_24622056|quiver:1-46351	26501	26596	HETRP_DM	1519	1634	Interspersed_Repeat	d	0.7812
utg_2539/0_24622056|quiver:1-46351	26645	26805	HETRP_DM	1516	1675	Interspersed_Repeat	d	0.8086
utg_2539/0_24622056|quiver:1-46351	26858	26911	HETRP_DM	1580	1632	Interspersed_Repeat	d	0.7778
utg_2539/0_24622056|quiver:1-46351	26959	27054	HETRP_DM	1519	1634	Interspersed_Repeat	d	0.7812
utg_2539/0_24622056|quiver:1-46351	27103	27263	HETRP_DM	1516	1675	Interspersed_Repeat	d	0.8086
utg_2539/0_24622056|quiver:1-46351	27316	27369	HETRP_DM	1580	1632	Interspersed_Repeat	d	0.7778
utg_2539/0_24622056|quiver:1-46351	27417	27512	HETRP_DM	1519	1634	Interspersed_Repeat	d	0.7812
utg_2539/0_24622056|quiver:1-46351	27561	27721	HETRP_DM	1516	1675	Interspersed_Repeat	d	0.8086
utg_2539/0_24622056|quiver:1-46351	27774	27827	HETRP_DM	1580	1632	Interspersed_Repeat	d	0.7778
utg_2539/0_24622056|quiver:1-46351	27875	27970	HETRP_DM	1519	1634	Interspersed_Repeat	d	0.7812
utg_2539/0_24622056|quiver:1-46351	28019	28179	HETRP_DM	1516	1675	Interspersed_Repeat	d	0.8086
utg_2539/0_24622056|quiver:1-46351	28232	28285	HETRP_DM	1580	1632	Interspersed_Repeat	d	0.7778
utg_2539/0_24622056|quiver:1-46351	28333	28428	HETRP_DM	1519	1634	Interspersed_Repeat	d	0.7812
utg_2539/0_24622056|quiver:1-46351	28477	28637	HETRP_DM	1516	1675	Interspersed_Repeat	d	0.8086
utg_2539/0_24622056|quiver:1-46351	28690	28743	HETRP_DM	1580	1632	Interspersed_Repeat	d	0.7778
utg_2539/0_24622056|quiver:1-46351	28791	28886	HETRP_DM	1519	1634	Interspersed_Repeat	d	0.7812
utg_2539/0_24622056|quiver:1-46351	28935	29095	HETRP_DM	1516	1675	Interspersed_Repeat	d	0.8086
utg_2539/0_24622056|quiver:1-46351	29148	29201	HETRP_DM	1580	1632	Interspersed_Repeat	d	0.7778
utg_2539/0_24622056|quiver:1-46351	29249	29344	HETRP_DM	1519	1634	Interspersed_Repeat	d	0.7812
utg_2539/0_24622056|quiver:1-46351	29393	29553	HETRP_DM	1516	1675	Interspersed_Repeat	d	0.8086
utg_2539/0_24622056|quiver:1-46351	29606	29659	HETRP_DM	1580	1632	Interspersed_Repeat	d	0.7778
utg_2539/0_24622056|quiver:1-46351	29707	29802	HETRP_DM	1519	1634	Interspersed_Repeat	d	0.7812
utg_2539/0_24622056|quiver:1-46351	29851	30011	HETRP_DM	1516	1675	Interspersed_Repeat	d	0.8086
utg_2539/0_24622056|quiver:1-46351	30064	30117	HETRP_DM	1580	1632	Interspersed_Repeat	d	0.7778
utg_2539/0_24622056|quiver:1-46351	30165	30260	HETRP_DM	1519	1634	Interspersed_Repeat	d	0.7812
utg_2539/0_24622056|quiver:1-46351	30309	30469	HETRP_DM	1516	1675	Interspersed_Repeat	d	0.8086
utg_2539/0_24622056|quiver:1-46351	30522	30575	HETRP_DM	1580	1632	Interspersed_Repeat	d	0.7778
utg_2539/0_24622056|quiver:1-46351	30623	30718	HETRP_DM	1519	1634	Interspersed_Repeat	d	0.7812
utg_2539/0_24622056|quiver:1-46351	30767	30927	HETRP_DM	1516	1675	Interspersed_Repeat	d	0.8086
utg_2539/0_24622056|quiver:1-46351	30980	31033	HETRP_DM	1580	1632	Interspersed_Repeat	d	0.7778
utg_2539/0_24622056|quiver:1-46351	31081	31176	HETRP_DM	1519	1634	Interspersed_Repeat	d	0.7812
utg_2539/0_24622056|quiver:1-46351	31225	31385	HETRP_DM	1516	1675	Interspersed_Repeat	d	0.8086
utg_2539/0_24622056|quiver:1-46351	31438	31491	HETRP_DM	1580	1632	Interspersed_Repeat	d	0.7778
utg_2539/0_24622056|quiver:1-46351	31539	31634	HETRP_DM	1519	1634	Interspersed_Repeat	d	0.7812
utg_2539/0_24622056|quiver:1-46351	31683	31843	HETRP_DM	1516	1675	Interspersed_Repeat	d	0.8086
utg_2539/0_24622056|quiver:1-46351	31896	31949	HETRP_DM	1580	1632	Interspersed_Repeat	d	0.7778
utg_2539/0_24622056|quiver:1-46351	31997	32092	HETRP_DM	1519	1634	Interspersed_Repeat	d	0.7812
utg_2539/0_24622056|quiver:1-46351	32141	32301	HETRP_DM	1516	1675	Interspersed_Repeat	d	0.8086
utg_2539/0_24622056|quiver:1-46351	32354	32407	HETRP_DM	1580	1632	Interspersed_Repeat	d	0.7778
utg_2539/0_24622056|quiver:1-46351	32455	32550	HETRP_DM	1519	1634	Interspersed_Repeat	d	0.7812
utg_2539/0_24622056|quiver:1-46351	32599	32759	HETRP_DM	1516	1675	Interspersed_Repeat	d	0.8086
utg_2539/0_24622056|quiver:1-46351	32812	32865	HETRP_DM	1580	1632	Interspersed_Repeat	d	0.7778
utg_2539/0_24622056|quiver:1-46351	32913	33008	HETRP_DM	1519	1634	Interspersed_Repeat	d	0.7812
utg_2539/0_24622056|quiver:1-46351	33057	33217	HETRP_DM	1516	1675	Interspersed_Repeat	d	0.8086
utg_2539/0_24622056|quiver:1-46351	33270	33323	HETRP_DM	1580	1632	Interspersed_Repeat	d	0.7778
utg_2539/0_24622056|quiver:1-46351	33371	33466	HETRP_DM	1519	1634	Interspersed_Repeat	d	0.7812
utg_2539/0_24622056|quiver:1-46351	33515	33675	HETRP_DM	1516	1675	Interspersed_Repeat	d	0.8086
utg_2539/0_24622056|quiver:1-46351	33728	33781	HETRP_DM	1580	1632	Interspersed_Repeat	d	0.7778
utg_2539/0_24622056|quiver:1-46351	33829	33924	HETRP_DM	1519	1634	Interspersed_Repeat	d	0.7812
utg_2539/0_24622056|quiver:1-46351	33973	34133	HETRP_DM	1516	1675	Interspersed_Repeat	d	0.8086
utg_2539/0_24622056|quiver:1-46351	34186	34239	HETRP_DM	1580	1632	Interspersed_Repeat	d	0.7778
utg_2539/0_24622056|quiver:1-46351	34287	34382	HETRP_DM	1519	1634	Interspersed_Repeat	d	0.7812
utg_2539/0_24622056|quiver:1-46351	34431	34591	HETRP_DM	1516	1675	Interspersed_Repeat	d	0.8086
utg_2539/0_24622056|quiver:1-46351	34644	34697	HETRP_DM	1580	1632	Interspersed_Repeat	d	0.7778
utg_2539/0_24622056|quiver:1-46351	34745	34840	HETRP_DM	1519	1634	Interspersed_Repeat	d	0.7812
utg_2539/0_24622056|quiver:1-46351	34889	35049	HETRP_DM	1516	1675	Interspersed_Repeat	d	0.8086
utg_2539/0_24622056|quiver:1-46351	35102	35155	HETRP_DM	1580	1632	Interspersed_Repeat	d	0.7778
utg_2539/0_24622056|quiver:1-46351	35203	35298	HETRP_DM	1519	1634	Interspersed_Repeat	d	0.7812
utg_2539/0_24622056|quiver:1-46351	35347	35507	HETRP_DM	1516	1675	Interspersed_Repeat	d	0.8086
utg_2539/0_24622056|quiver:1-46351	35560	35613	HETRP_DM	1580	1632	Interspersed_Repeat	d	0.7778
utg_2539/0_24622056|quiver:1-46351	35661	35756	HETRP_DM	1519	1634	Interspersed_Repeat	d	0.7812
utg_2539/0_24622056|quiver:1-46351	35805	35965	HETRP_DM	1516	1675	Interspersed_Repeat	d	0.8086
utg_2539/0_24622056|quiver:1-46351	36018	36071	HETRP_DM	1580	1632	Interspersed_Repeat	d	0.7778
utg_2539/0_24622056|quiver:1-46351	36119	36214	HETRP_DM	1519	1634	Interspersed_Repeat	d	0.7812
utg_2539/0_24622056|quiver:1-46351	36263	36423	HETRP_DM	1516	1675	Interspersed_Repeat	d	0.8086
utg_2539/0_24622056|quiver:1-46351	36476	36529	HETRP_DM	1580	1632	Interspersed_Repeat	d	0.7778
utg_2539/0_24622056|quiver:1-46351	36577	36672	HETRP_DM	1519	1634	Interspersed_Repeat	d	0.7812
utg_2539/0_24622056|quiver:1-46351	36721	36881	HETRP_DM	1516	1675	Interspersed_Repeat	d	0.8086
utg_2539/0_24622056|quiver:1-46351	36934	36987	HETRP_DM	1580	1632	Interspersed_Repeat	d	0.7778
utg_2539/0_24622056|quiver:1-46351	37035	37130	HETRP_DM	1519	1634	Interspersed_Repeat	d	0.7812
utg_2539/0_24622056|quiver:1-46351	37179	37339	HETRP_DM	1516	1675	Interspersed_Repeat	d	0.8086
utg_2539/0_24622056|quiver:1-46351	37392	37445	HETRP_DM	1580	1632	Interspersed_Repeat	d	0.7778
utg_2539/0_24622056|quiver:1-46351	37493	37588	HETRP_DM	1519	1634	Interspersed_Repeat	d	0.7812
utg_2539/0_24622056|quiver:1-46351	37637	37797	HETRP_DM	1516	1675	Interspersed_Repeat	d	0.8086
utg_2539/0_24622056|quiver:1-46351	37850	37903	HETRP_DM	1580	1632	Interspersed_Repeat	d	0.7778
utg_2539/0_24622056|quiver:1-46351	37951	38046	HETRP_DM	1519	1634	Interspersed_Repeat	d	0.7812
utg_2539/0_24622056|quiver:1-46351	38095	38255	HETRP_DM	1516	1675	Interspersed_Repeat	d	0.8086
utg_2539/0_24622056|quiver:1-46351	38308	38361	HETRP_DM	1580	1632	Interspersed_Repeat	d	0.7778
utg_2539/0_24622056|quiver:1-46351	38409	38504	HETRP_DM	1519	1634	Interspersed_Repeat	d	0.7812
utg_2539/0_24622056|quiver:1-46351	38553	38713	HETRP_DM	1516	1675	Interspersed_Repeat	d	0.8086
utg_2539/0_24622056|quiver:1-46351	38766	38819	HETRP_DM	1580	1632	Interspersed_Repeat	d	0.7778
utg_2539/0_24622056|quiver:1-46351	38867	38962	HETRP_DM	1519	1634	Interspersed_Repeat	d	0.7812
utg_2539/0_24622056|quiver:1-46351	39011	39171	HETRP_DM	1516	1675	Interspersed_Repeat	d	0.8086
utg_2539/0_24622056|quiver:1-46351	39224	39277	HETRP_DM	1580	1632	Interspersed_Repeat	d	0.7778
utg_2539/0_24622056|quiver:1-46351	39325	39420	HETRP_DM	1519	1634	Interspersed_Repeat	d	0.7812
utg_2539/0_24622056|quiver:1-46351	39469	39629	HETRP_DM	1516	1675	Interspersed_Repeat	d	0.8086
utg_2539/0_24622056|quiver:1-46351	39682	39735	HETRP_DM	1580	1632	Interspersed_Repeat	d	0.7778
utg_2539/0_24622056|quiver:1-46351	39783	39878	HETRP_DM	1519	1634	Interspersed_Repeat	d	0.7812
utg_2539/0_24622056|quiver:1-46351	39927	40087	HETRP_DM	1516	1675	Interspersed_Repeat	d	0.8086
utg_2539/0_24622056|quiver:1-46351	40140	40193	HETRP_DM	1580	1632	Interspersed_Repeat	d	0.7778
utg_2539/0_24622056|quiver:1-46351	40241	40336	HETRP_DM	1519	1634	Interspersed_Repeat	d	0.7812
utg_2539/0_24622056|quiver:1-46351	40385	40545	HETRP_DM	1516	1675	Interspersed_Repeat	d	0.8086
utg_2539/0_24622056|quiver:1-46351	40598	40651	HETRP_DM	1580	1632	Interspersed_Repeat	d	0.7778
utg_2539/0_24622056|quiver:1-46351	40699	40794	HETRP_DM	1519	1634	Interspersed_Repeat	d	0.7812
utg_2539/0_24622056|quiver:1-46351	40843	41003	HETRP_DM	1516	1675	Interspersed_Repeat	d	0.8086
utg_2539/0_24622056|quiver:1-46351	41056	41109	HETRP_DM	1580	1632	Interspersed_Repeat	d	0.7778
utg_2539/0_24622056|quiver:1-46351	41157	41252	HETRP_DM	1519	1634	Interspersed_Repeat	d	0.7812
utg_2539/0_24622056|quiver:1-46351	41301	41461	HETRP_DM	1516	1675	Interspersed_Repeat	d	0.8086
utg_2539/0_24622056|quiver:1-46351	41514	41567	HETRP_DM	1580	1632	Interspersed_Repeat	d	0.7778
utg_2539/0_24622056|quiver:1-46351	41615	41710	HETRP_DM	1519	1634	Interspersed_Repeat	d	0.7812
utg_2539/0_24622056|quiver:1-46351	41759	41919	HETRP_DM	1516	1675	Interspersed_Repeat	d	0.8086
utg_2539/0_24622056|quiver:1-46351	42018	42151	HETRP_DM	1555	1675	Interspersed_Repeat	d	0.8065
utg_2539/0_24622056|quiver:1-46351	42315	43027	DNAREP1_DSim	1	686	DNA/Helitron	d	0.8517
utg_2539/0_24622056|quiver:1-46351	43344	43467	Kolobok-1_LCh	7335	7454	DNA/Kolobok	c	0.7083
utg_2539/0_24622056|quiver:1-46351	43564	43845	DNAREP1_DM	315	594	DNA/Helitron	c	0.7794
utg_2539/0_24622056|quiver:1-46351	43850	44025	Helitron-1_DEu	1	188	DNA/Helitron	c	0.8045
