# Supplementary material for: Diversification and collapse of a telomere elongation mechanism
Source: HighWire-hosted journal article supplement (doi:10.1101/gr.245001.118), 2019-05-28
Supplement: Supplemental_Table_S6.xlsx [file Supplemental_Table_S6.xlsx]

## Sheet: 2L
Table S6. Repbase annotation of four telomeres from D. biarmipes.
Telomeric_Contig	start_position_on_contig	end_position_on_contig	TE	start_position_on_TE	end_position_on_TE	TE_Class	Sense(direct or complentary)	Identity_to_Repbase_consensus
ctg7180000004249:1-94052	1010	1119	EnSpm-16_DR	9412	9522	DNA/EnSpm/CACTA	c	0.7117
ctg7180000004249:1-94052	1169	1328	EnSpm-2_SIt	6417	6578	DNA/EnSpm/CACTA	d	0.7289
ctg7180000004249:1-94052	1491	1536	ERV147_MD_I	5071	5116	ERV/ERV2	d	0.8261
ctg7180000004249:1-94052	1747	1822	EnSpm-N13_DR	5741	5815	DNA/EnSpm/CACTA	c	0.7763
ctg7180000004249:1-94052	2823	2901	Tx1-2_CGi	2080	2154	NonLTR/Tx1	d	0.7595
ctg7180000004249:1-94052	2907	3096	SAR2_DM	235	425	Simple/Sat/SAT	c	0.7021
ctg7180000004249:1-94052	3370	3446	Mariner-N5C_DR	7138	7213	DNA/Mariner	c	0.7368
ctg7180000004249:1-94052	4466	4553	GmGYPSY11_I	78	168	LTR/Gypsy	c	0.7222
ctg7180000004249:1-94052	4790	4973	SAR2_DM	265	452	Simple/Sat/SAT	c	0.6898
ctg7180000004249:1-94052	4982	5041	PROTOP_A	829	887	DNA/P	d	0.7333
ctg7180000004249:1-94052	5899	5981	hAT-1_SP	107	199	DNA/hAT	d	0.8023
ctg7180000004249:1-94052	6640	6706	Merlin-1_HM	1790	1855	DNA/Merlin	d	0.7612
ctg7180000004249:1-94052	6905	7084	SAR_DM	293	483	Simple/Sat/SAT	c	0.6923
ctg7180000004249:1-94052	7212	7303	SAR_DM	417	508	Simple/Sat/SAT	c	0.7312
ctg7180000004249:1-94052	7554	7645	SAR_DM	764	854	Simple/Sat/SAT	c	0.7312
ctg7180000004249:1-94052	7712	7759	CR1_Ele16	25	70	NonLTR/CR1	d	0.8571
ctg7180000004249:1-94052	8237	8341	hATm-17_HM	3297	3396	DNA/hAT	d	0.7255
ctg7180000004249:1-94052	8349	8451	SAT-1_DEl	865	968	Simple/Sat/SAT	c	0.767
ctg7180000004249:1-94052	8877	9005	Gypsy-53_PM-LTR	501	634	LTR/Gypsy	d	0.6535
ctg7180000004249:1-94052	9116	9288	SAR_DM	362	541	Simple/Sat/SAT	c	0.7267
ctg7180000004249:1-94052	9681	9735	R1-10_DWi	4693	4748	NonLTR/R1	d	0.8036
ctg7180000004249:1-94052	10116	10204	ERV6_MD_I	6685	6779	ERV/ERV1	c	0.7253
ctg7180000004249:1-94052	10523	10767	IMPB_01	167	406	Simple/Sat	c	0.6901
ctg7180000004249:1-94052	11009	11392	SAR2_DM	30	419	Simple/Sat/SAT	c	0.6475
ctg7180000004249:1-94052	11593	11655	CENSATC4_ZM	427	490	Simple/Sat/SAT	d	0.7692
ctg7180000004249:1-94052	11669	11725	L1-18_Lch	4710	4769	NonLTR/L1	d	0.7797
ctg7180000004249:1-94052	11918	11959	Helitron-N196_OS	556	597	DNA/Helitron	c	0.8095
ctg7180000004249:1-94052	12121	12291	Ginger2-1_LS	792	951	DNA/Ginger2	c	0.7394
ctg7180000004249:1-94052	12380	12453	hAT-N13_LSal	805	880	DNA/hAT	c	0.7808
ctg7180000004249:1-94052	12571	12796	SAR_DM	362	589	Simple/Sat/SAT	c	0.6968
ctg7180000004249:1-94052	12888	13041	SAR2_DM	264	419	Simple/Sat/SAT	c	0.7051
ctg7180000004249:1-94052	13126	13265	SAR2_DM	299	437	Simple/Sat/SAT	c	0.7153
ctg7180000004249:1-94052	13275	13407	L1-11_GM	18	145	NonLTR/L1	d	0.7364
ctg7180000004249:1-94052	13651	14043	SAR2_DM	42	437	Simple/Sat/SAT	c	0.6891
ctg7180000004249:1-94052	14311	14479	SAR2_DM	256	422	Simple/Sat/SAT	c	0.7048
ctg7180000004249:1-94052	14521	14631	Polinton-3_HM	5903	6013	DNA/Polinton	d	0.7064
ctg7180000004249:1-94052	14993	15020	DNA-N26B_DR	362	389	DNA	d	0.9643
ctg7180000004249:1-94052	15151	15237	Crack-8_HMa	3998	4081	NonLTR/Daphne	d	0.7619
ctg7180000004249:1-94052	15552	15720	ENSPM-6_ZM	5954	6113	DNA/EnSpm/CACTA	d	0.697
ctg7180000004249:1-94052	15882	15966	Gypsy-1B_NS-I	3382	3463	LTR/Gypsy	d	0.7349
ctg7180000004249:1-94052	16102	16473	SAR2_DM	100	474	Simple/Sat/SAT	c	0.6731
ctg7180000004249:1-94052	16503	16561	CR1-5_CGi	810	869	NonLTR/CR1	d	0.7541
ctg7180000004249:1-94052	16694	16771	VANDAL5A	1697	1771	DNA/MuDR	c	0.7143
ctg7180000004249:1-94052	16917	17014	SAR_DM	1158	1255	Simple/Sat/SAT	c	0.7526
ctg7180000004249:1-94052	17172	17304	SAR_DM	407	540	Simple/Sat/SAT	c	0.7323
ctg7180000004249:1-94052	17519	17614	SAR_DM	407	503	Simple/Sat/SAT	c	0.7113
ctg7180000004249:1-94052	17927	18025	Mariner-14_DK	85	160	DNA/Mariner	d	0.7901
ctg7180000004249:1-94052	18289	18398	Mariner-14_DK	83	179	DNA/Mariner	d	0.7551
ctg7180000004249:1-94052	18420	18517	Zisupton-2_PGr	12999	13092	DNA/Zisupton	d	0.7576
ctg7180000004249:1-94052	18996	19156	Gypsy-12_ATr-LTR	2531	2676	LTR/Gypsy	c	0.7351
ctg7180000004249:1-94052	19200	19273	hAT-N13_LSal	805	880	DNA/hAT	c	0.7808
ctg7180000004249:1-94052	19410	19815	SAR2_DM	27	437	Simple/Sat/SAT	c	0.6856
ctg7180000004249:1-94052	20072	20241	SAR2_DM	256	422	Simple/Sat/SAT	c	0.7108
ctg7180000004249:1-94052	20283	20393	Polinton-3_HM	5903	6013	DNA/Polinton	d	0.7064
ctg7180000004249:1-94052	20814	20904	EnSpm-N20_DR	1157	1257	DNA/EnSpm/CACTA	c	0.7234
ctg7180000004249:1-94052	20915	21001	Crack-8_HMa	3998	4081	NonLTR/Daphne	d	0.7619
ctg7180000004249:1-94052	21240	21431	Gypsy-12_ATr-LTR	2481	2663	LTR/Gypsy	c	0.6703
ctg7180000004249:1-94052	21567	21752	SAR2_DM	289	474	Simple/Sat/SAT	c	0.6902
ctg7180000004249:1-94052	21893	21960	CR1-5_CGi	803	869	NonLTR/CR1	d	0.7536
ctg7180000004249:1-94052	22109	22267	SAR2_DM	275	437	Simple/Sat/SAT	c	0.7125
ctg7180000004249:1-94052	22355	22490	SAR2_DM	299	437	Simple/Sat/SAT	c	0.708
ctg7180000004249:1-94052	22676	22836	SAR_DM	373	539	Simple/Sat/SAT	c	0.7358
ctg7180000004249:1-94052	22938	23020	ATMUN1	286	360	DNA/MuDR	c	0.8148
ctg7180000004249:1-94052	23022	23073	Gypsy-2_DEl-I	4815	4866	LTR/Gypsy	d	0.8654
ctg7180000004249:1-94052	23111	23551	Helitron-N2_DBi	1	452	DNA/Helitron	c	0.9208
ctg7180000004249:1-94052	24278	24397	hAT-10_HRo	1674	1796	DNA/hAT	d	0.7586
ctg7180000004249:1-94052	24893	25826	Helitron-N2_DBi	1	962	DNA/Helitron	d	0.9479
ctg7180000004249:1-94052	26195	26228	Mariner-6_DK	1535	1568	DNA/Mariner	d	0.9118
ctg7180000004249:1-94052	27154	27223	Helitron-N2_DBi	897	962	DNA/Helitron	c	0.9254
ctg7180000004249:1-94052	27282	27811	Helitron-N2_DBi	84	641	DNA/Helitron	c	0.8346
ctg7180000004249:1-94052	27828	27912	Copia-7_Mad-I	4210	4303	LTR/Copia	c	0.7363
ctg7180000004249:1-94052	28038	28125	Polinton-2_SM	9590	9679	DNA/Polinton	c	0.7222
ctg7180000004249:1-94052	28173	28308	Polinton-6_SM	40	201	DNA/Polinton	c	0.7361
ctg7180000004249:1-94052	28362	28394	Gypsy-72_NS-LTR	199	233	LTR/Gypsy	d	0.9412
ctg7180000004249:1-94052	28470	28570	Helitron-N20_ALy	809	903	DNA/Helitron	d	0.7629
ctg7180000004249:1-94052	28623	28687	Gypsy-57_CQ-I	1894	1960	LTR/Gypsy	c	0.7612
ctg7180000004249:1-94052	30817	30905	Helitron-N1_DBi	487	582	DNA/Helitron	c	0.8111
ctg7180000004249:1-94052	30956	31035	Helitron-N1_DBi	274	353	DNA/Helitron	c	0.725
ctg7180000004249:1-94052	31171	31252	Helitron-N1_DBi	73	146	DNA/Helitron	c	0.8267
ctg7180000004249:1-94052	31351	31440	DNA-8-1_HM	115	207	DNA	c	0.7419
ctg7180000004249:1-94052	32842	32915	hATm-22_HM	514	582	DNA/hAT	d	0.7917
ctg7180000004249:1-94052	33304	33376	Copia-124_SB-I	1255	1324	LTR/Copia	d	0.7639
ctg7180000004249:1-94052	33696	33820	Dada-tA_DR	8243	8401	DNA/Dada	c	0.7612
ctg7180000004249:1-94052	34265	34306	Helitron-N1_DBi	537	588	DNA/Helitron	d	0.9091
ctg7180000004249:1-94052	34400	34453	DNAREP2_DSim	513	566	DNA/Helitron	c	0.7963
ctg7180000004249:1-94052	34573	34951	Helitron-N2_DBi	41	441	DNA/Helitron	d	0.8568
ctg7180000004249:1-94052	34964	35319	Helitron-N2_DBi	591	962	DNA/Helitron	c	0.7977
ctg7180000004249:1-94052	35322	35678	Helitron-N2_DBi	559	962	DNA/Helitron	d	0.7631
ctg7180000004249:1-94052	36259	36330	Polinton-1_DEu	4815	4874	DNA/Polinton	c	0.8197
ctg7180000004249:1-94052	36378	36409	HELITRON1_CE	1392	1425	DNA/Helitron	d	0.9412
ctg7180000004249:1-94052	36998	37073	EnSpm-N2_EL	1069	1142	DNA/EnSpm/CACTA	c	0.7368
ctg7180000004249:1-94052	37295	37324	EnSpm-3_HV	10377	10406	DNA/EnSpm/CACTA	d	0.9
ctg7180000004249:1-94052	37753	37819	Helitron-1_DT	182	248	DNA/Helitron	d	0.7761
ctg7180000004249:1-94052	38519	38591	Helitron-N2_DBi	879	955	DNA/Helitron	c	0.8667
ctg7180000004249:1-94052	38666	38746	Helitron-N2_DBi	804	893	DNA/Helitron	c	0.939
ctg7180000004249:1-94052	38747	39114	Helitron-N2_DBi	569	961	DNA/Helitron	d	0.7759
ctg7180000004249:1-94052	39178	39244	Gypsy-2_DEl-I	4817	4886	LTR/Gypsy	c	0.8088
ctg7180000004249:1-94052	40838	40902	L1-15_Mad	1656	1718	NonLTR/L1	c	0.7812
ctg7180000004249:1-94052	44306	44357	Helitron-N2_DEl	2	58	DNA/Helitron	c	0.8491
ctg7180000004249:1-94052	45107	45180	Gypsy-33_ST-I	1454	1527	LTR/Gypsy	c	0.7067
ctg7180000004249:1-94052	45190	45231	Gypsy-7_CGi-I	3754	3792	LTR/Gypsy	c	0.878
ctg7180000004249:1-94052	46542	46617	DNA8-28_DR	3004	3091	DNA	d	0.7778
ctg7180000004249:1-94052	46732	46839	Gypsy-38_STu-I	1810	1914	LTR/Gypsy	d	0.7407
ctg7180000004249:1-94052	47248	47298	Mariner-9_CPB	2323	2369	DNA/Mariner	c	0.8125
ctg7180000004249:1-94052	48751	48840	DIRS-8B_DR	208	291	LTR/DIRS	c	0.7326
ctg7180000004249:1-94052	50220	50283	Gypsy-74_OS-I	695	756	LTR/Gypsy	c	0.75
ctg7180000004249:1-94052	50432	50484	hAT-42_Lch	1209	1260	DNA/hAT	c	0.7736
ctg7180000004249:1-94052	50920	51040	Gypsy-2_PGr-I	363	485	LTR/Gypsy	d	0.7059
ctg7180000004249:1-94052	51800	51869	Caulimovirus-10_ATr	3334	3404	IntegratedVirus/Caulimovirus	d	0.7183
ctg7180000004249:1-94052	51996	52271	CR1-2_CQ	1199	1477	NonLTR/CR1	c	0.688
ctg7180000004249:1-94052	52547	52606	JW_Av	19114	19181	NonLTR/Penelope	c	0.7937
ctg7180000004249:1-94052	52850	52893	PtTalladega_LTR	432	475	LTR	d	0.7727
ctg7180000004249:1-94052	56295	56363	CRE-14_CCri	1145	1211	NonLTR/CRE	c	0.7647
ctg7180000004249:1-94052	56398	56469	Tx1-32_DR	3809	3878	NonLTR/Tx1	d	0.7534
ctg7180000004249:1-94052	56841	56925	Helitron-N1_DBi	496	587	DNA/Helitron	d	0.7586
ctg7180000004249:1-94052	57869	57909	L1-51_ACar	4386	4423	NonLTR/L1	c	0.8974
ctg7180000004249:1-94052	57969	58445	Helitron-N2_DBi	63	636	DNA/Helitron	d	0.8372
ctg7180000004249:1-94052	58478	58577	Helitron-N2_DBi	861	962	DNA/Helitron	d	0.85
ctg7180000004249:1-94052	58876	58945	hAT-3N4_ATr	509	584	DNA/hAT	d	0.7465
ctg7180000004249:1-94052	59183	59333	Gypsy-29_DWil-I	191	330	LTR/Gypsy	c	0.6871
ctg7180000004249:1-94052	62867	62903	R1_DWi	1096	1132	NonLTR/R1	c	0.8378
ctg7180000004249:1-94052	65719	65794	Copia-31_GR-I	16	89	LTR/Copia	d	0.7105
ctg7180000004249:1-94052	66362	66394	MuDr-7N1_LSal	2687	2722	DNA/MuDR	c	0.9118
ctg7180000004249:1-94052	66421	66533	Gypsy-19_DAn-I	653	749	LTR/Gypsy	c	0.75
ctg7180000004249:1-94052	68171	68205	Gypsy-113_MLP-I	5196	5232	LTR/Gypsy	c	0.8919
ctg7180000004249:1-94052	69629	69726	MDG1_I	762	862	LTR/Gypsy	d	0.75
ctg7180000004249:1-94052	71871	71926	BEL-6_DMoj-I	3962	4019	LTR/BEL	d	0.7368
ctg7180000004249:1-94052	72675	72738	PYRET_I	5530	5595	LTR/Gypsy	d	0.7463
ctg7180000004249:1-94052	73128	73207	Helitron-1N2_HM	2066	2135	DNA/Helitron	d	0.7838
ctg7180000004249:1-94052	75126	75158	EnSpm-1_SIn	851	883	DNA/EnSpm/CACTA	c	0.8788
ctg7180000004249:1-94052	76692	76777	L1-2_VC	5727	5817	NonLTR/L1	c	0.7
ctg7180000004249:1-94052	77124	77176	Gypsy-28_DAn-I	5479	5526	LTR/Gypsy	c	0.8039
ctg7180000004249:1-94052	78294	78353	TE2-4_CR	689	753	Interspersed_Repeat	c	0.7903
ctg7180000004249:1-94052	78411	78442	Sola1-5_AP	1087	1117	DNA/Sola/Sola1	c	0.9375
ctg7180000004249:1-94052	78626	78682	L1-13_Mad	1965	2025	NonLTR/L1	c	0.8103
ctg7180000004249:1-94052	80197	80239	Copia-46_GM-I	3290	3334	LTR/Copia	d	0.8182
ctg7180000004249:1-94052	80800	80917	CryptonV-N2_DR	11186	11299	DNA/Crypton/CryptonV	d	0.7414
ctg7180000004249:1-94052	81960	82005	hAT-14_LCh	2287	2333	DNA/hAT	c	0.8085
ctg7180000004249:1-94052	82018	82127	Helitron-N147_OS	545	655	DNA/Helitron	d	0.7345
ctg7180000004249:1-94052	82944	82985	Gypsy-95_OS-I	647	689	LTR/Gypsy	c	0.8409
ctg7180000004249:1-94052	83331	83373	PSL	1711	1751	DNA/EnSpm/CACTA	c	0.8333
ctg7180000004249:1-94052	83707	83741	LINE1F_MT	1060	1095	NonLTR/L1	c	0.8889
ctg7180000004249:1-94052	83854	83929	MuDR-80_OS	12577	12654	DNA/MuDR	c	0.7564
ctg7180000004249:1-94052	84547	84604	Gypsy-47_Mad-I	9558	9620	LTR/Gypsy	c	0.7458
ctg7180000004249:1-94052	92792	92824	ATGP2I	178	212	LTR/Gypsy	c	0.9118
ctg7180000004249:1-94052	93049	93091	Gypsy137-I_DR	5832	5874	LTR/Gypsy	d	0.814
ctg7180000004249:1-94052	93218	93314	Gypsy-16_Mad-I	3520	3620	LTR/Gypsy	d	0.7576
ctg7180000004249:1-94052	93792	93907	EnSpm-N4_HM	2753	2853	DNA/EnSpm/CACTA	c	0.7453

## Sheet: 2R
Table S6. Repbase annotation of four telomeres from D. biarmipes.
Telomeric_Contig	start_position_on_contig	end_position_on_contig	TE	start_position_on_TE	end_position_on_TE	TE_Class	Sense(direct or complentary)	Identity_to_Repbase_consensus
ctg7180000004040:1-210335	1	2350	ROO_I	1	2500	LTR/BEL	c	0.9924
ctg7180000004040:1-210335	2351	2771	ROO_LTR	1	428	LTR/BEL	c	0.9883
ctg7180000004040:1-210335	2795	3078	SAR2_DM	263	547	Simple/Sat/SAT	c	0.6807
ctg7180000004040:1-210335	3259	3313	Gypsy-15_SMo-I	284	337	LTR/Gypsy	c	0.8036
ctg7180000004040:1-210335	3473	3622	SAR_DM	360	505	Simple/Sat/SAT	c	0.7075
ctg7180000004040:1-210335	3644	3998	SAR2_DM	42	402	Simple/Sat/SAT	c	0.6835
ctg7180000004040:1-210335	4008	4086	XDMR	6	84	Simple/Sat/SAT	c	0.7595
ctg7180000004040:1-210335	4295	4519	SAR2_DM	201	419	Simple/Sat/SAT	c	0.7182
ctg7180000004040:1-210335	4597	4859	SAR2_DM	151	419	Simple/Sat/SAT	c	0.6947
ctg7180000004040:1-210335	5228	5309	SAR_DM	424	505	Simple/Sat/SAT	c	0.7317
ctg7180000004040:1-210335	5418	5480	SAT-1_DEl	503	565	Simple/Sat/SAT	c	0.7937
ctg7180000004040:1-210335	5818	5977	XDMR	6	177	Simple/Sat/SAT	c	0.703
ctg7180000004040:1-210335	5978	6060	Polinton-1_EI	15672	15757	DNA/Polinton	c	0.7778
ctg7180000004040:1-210335	6137	6202	Copia-23_NVi-I	827	881	LTR/Copia	c	0.8421
ctg7180000004040:1-210335	6461	6586	HAT-N6_Mad	336	454	DNA/hAT	c	0.7377
ctg7180000004040:1-210335	6932	6976	DNA6-1_MLP	2424	2469	DNA	d	0.8043
ctg7180000004040:1-210335	7226	7339	hATm-13_HM	3412	3537	DNA/hAT	c	0.735
ctg7180000004040:1-210335	7347	7484	EnSpm-1_HM	3050	3164	DNA/EnSpm/CACTA	d	0.7373
ctg7180000004040:1-210335	7734	7821	DNA-8-2_HM	102	202	DNA	c	0.7419
ctg7180000004040:1-210335	7883	7911	DNA-8N1_PBa	383	411	DNA	c	0.9655
ctg7180000004040:1-210335	7962	8009	hAT-7_ATr	10367	10412	DNA/hAT	d	0.8085
ctg7180000004040:1-210335	8169	8299	Ginger2-1_LS	767	887	DNA/Ginger2	c	0.7642
ctg7180000004040:1-210335	8506	8956	SAR2_DM	145	603	Simple/Sat/SAT	c	0.6608
ctg7180000004040:1-210335	9041	9195	SAR2_DM	263	419	Simple/Sat/SAT	c	0.7389
ctg7180000004040:1-210335	9329	9411	SIMPLEGUY1	285	359	DNA/Harbinger	c	0.7436
ctg7180000004040:1-210335	9523	9921	SAR2_DM	38	437	Simple/Sat/SAT	c	0.6833
ctg7180000004040:1-210335	9931	10014	XDMR	1	84	Simple/Sat/SAT	c	0.7619
ctg7180000004040:1-210335	10218	10442	SAR2_DM	201	419	Simple/Sat/SAT	c	0.7182
ctg7180000004040:1-210335	10520	10782	SAR2_DM	151	419	Simple/Sat/SAT	c	0.6935
ctg7180000004040:1-210335	11151	11232	SAR_DM	424	505	Simple/Sat/SAT	c	0.7317
ctg7180000004040:1-210335	11340	11435	SAT-1_DEl	74	164	Simple/Sat/SAT	c	0.7553
ctg7180000004040:1-210335	11704	11861	XDMR	6	177	Simple/Sat/SAT	c	0.7117
ctg7180000004040:1-210335	11892	11947	MuDR-11B_GM	1795	1847	DNA/MuDR	c	0.7778
ctg7180000004040:1-210335	11991	12056	Copia-23_NVi-I	827	881	LTR/Copia	c	0.8421
ctg7180000004040:1-210335	12315	12440	HAT-N6_Mad	336	454	DNA/hAT	c	0.7377
ctg7180000004040:1-210335	12571	12673	Gypsy-13_DSim-I	4468	4568	LTR/Gypsy	d	0.703
ctg7180000004040:1-210335	12786	12830	DNA6-1_MLP	2424	2469	DNA	d	0.8043
ctg7180000004040:1-210335	13090	13193	Gypsy-27_ATr-I	1400	1492	LTR/Gypsy	c	0.7234
ctg7180000004040:1-210335	13201	13340	EnSpm-1_HM	3050	3166	DNA/EnSpm/CACTA	d	0.7417
ctg7180000004040:1-210335	13590	13677	DNA-8-2_HM	102	202	DNA	c	0.7419
ctg7180000004040:1-210335	13739	13767	DNA-8N1_PBa	383	411	DNA	c	0.9655
ctg7180000004040:1-210335	13818	13865	hAT-7_ATr	10367	10412	DNA/hAT	d	0.8085
ctg7180000004040:1-210335	14124	14169	DNA9-3_DR	9390	9435	DNA	c	0.8043
ctg7180000004040:1-210335	14365	14814	SAR2_DM	145	603	Simple/Sat/SAT	c	0.6601
ctg7180000004040:1-210335	14899	15053	SAR2_DM	263	419	Simple/Sat/SAT	c	0.7389
ctg7180000004040:1-210335	15187	15269	SIMPLEGUY1	285	359	DNA/Harbinger	c	0.7436
ctg7180000004040:1-210335	15449	15598	SAR_DM	360	505	Simple/Sat/SAT	c	0.7075
ctg7180000004040:1-210335	15620	15801	SAR2_DM	219	402	Simple/Sat/SAT	c	0.7065
ctg7180000004040:1-210335	15927	16082	SAR2_DM	258	403	Simple/Sat/SAT	c	0.698
ctg7180000004040:1-210335	16275	16499	SAR2_DM	201	419	Simple/Sat/SAT	c	0.7182
ctg7180000004040:1-210335	16577	16840	SAR2_DM	151	419	Simple/Sat/SAT	c	0.6947
ctg7180000004040:1-210335	16947	16999	Tx1-28_DR	3419	3471	NonLTR/Tx1	d	0.7925
ctg7180000004040:1-210335	17208	17289	SAR_DM	424	505	Simple/Sat/SAT	c	0.7317
ctg7180000004040:1-210335	17398	17504	SAT-1_DEl	58	164	Simple/Sat/SAT	c	0.7524
ctg7180000004040:1-210335	17521	17601	L1PBA_5	2868	2940	NonLTR/L1	c	0.7237
ctg7180000004040:1-210335	17828	17987	XDMR	6	177	Simple/Sat/SAT	c	0.703
ctg7180000004040:1-210335	18139	18204	Copia-23_NVi-I	827	881	LTR/Copia	c	0.8421
ctg7180000004040:1-210335	18463	18588	HAT-N6_Mad	336	454	DNA/hAT	c	0.7377
ctg7180000004040:1-210335	18642	18674	Copia-34_SB-I	9713	9745	LTR/Copia	d	0.8485
ctg7180000004040:1-210335	18934	18978	DNA6-1_MLP	2424	2469	DNA	d	0.8043
ctg7180000004040:1-210335	19243	19346	Gypsy-27_ATr-I	1400	1492	LTR/Gypsy	c	0.7234
ctg7180000004040:1-210335	19354	19493	EnSpm-1_HM	3050	3166	DNA/EnSpm/CACTA	d	0.7417
ctg7180000004040:1-210335	19743	19830	DNA-8-2_HM	102	202	DNA	c	0.7419
ctg7180000004040:1-210335	19890	19918	DNA-8N1_PBa	383	411	DNA	c	0.9655
ctg7180000004040:1-210335	19969	20016	hAT-7_ATr	10367	10412	DNA/hAT	d	0.8085
ctg7180000004040:1-210335	20169	20313	Gypsy-18_ATr-LTR	1961	2094	LTR/Gypsy	c	0.7153
ctg7180000004040:1-210335	20519	20969	SAR2_DM	145	603	Simple/Sat/SAT	c	0.6608
ctg7180000004040:1-210335	21054	21208	SAR2_DM	263	419	Simple/Sat/SAT	c	0.7389
ctg7180000004040:1-210335	21342	21424	SIMPLEGUY1	285	359	DNA/Harbinger	c	0.7436
ctg7180000004040:1-210335	21604	21738	SAR_DM	380	505	Simple/Sat/SAT	c	0.7154
ctg7180000004040:1-210335	21775	21951	SAR2_DM	219	402	Simple/Sat/SAT	c	0.7056
ctg7180000004040:1-210335	22078	22243	SAR2_DM	258	403	Simple/Sat/SAT	c	0.702
ctg7180000004040:1-210335	22435	22659	SAR2_DM	201	419	Simple/Sat/SAT	c	0.7182
ctg7180000004040:1-210335	22737	22998	SAR2_DM	151	419	Simple/Sat/SAT	c	0.6923
ctg7180000004040:1-210335	23367	23448	SAR_DM	424	505	Simple/Sat/SAT	c	0.7317
ctg7180000004040:1-210335	23556	23590	SAT-1_DEl	531	565	Simple/Sat/SAT	c	0.8286
ctg7180000004040:1-210335	23595	23695	SAR2_DM	270	374	Simple/Sat/SAT	c	0.7379
ctg7180000004040:1-210335	23797	23853	I-4_DK	2253	2308	NonLTR/I	c	0.8182
ctg7180000004040:1-210335	24197	24322	HAT-N6_Mad	336	454	DNA/hAT	c	0.7377
ctg7180000004040:1-210335	24521	24570	Gypsy-27_DEl-I	806	853	LTR/Gypsy	d	0.7959
ctg7180000004040:1-210335	24667	24711	DNA6-1_MLP	2424	2469	DNA	d	0.8043
ctg7180000004040:1-210335	24928	24997	DNA9-5_Mad	542	611	DNA	d	0.8169
ctg7180000004040:1-210335	25253	25392	EnSpm-1_HM	3050	3166	DNA/EnSpm/CACTA	d	0.7417
ctg7180000004040:1-210335	25720	25748	DNA-8N1_PBa	383	411	DNA	c	0.9655
ctg7180000004040:1-210335	25829	25902	MuDR-21_VV	780	861	DNA/MuDR	d	0.7763
ctg7180000004040:1-210335	26018	26140	Gypsy-18_ATr-LTR	1993	2107	LTR/Gypsy	c	0.7759
ctg7180000004040:1-210335	26311	26803	SAR2_DM	145	644	Simple/Sat/SAT	c	0.6586
ctg7180000004040:1-210335	26888	27043	SAR2_DM	263	419	Simple/Sat/SAT	c	0.7405
ctg7180000004040:1-210335	27177	27259	SIMPLEGUY1	285	359	DNA/Harbinger	c	0.7436
ctg7180000004040:1-210335	27439	27572	SAR_DM	380	505	Simple/Sat/SAT	c	0.7154
ctg7180000004040:1-210335	27609	27786	SAR2_DM	219	402	Simple/Sat/SAT	c	0.7033
ctg7180000004040:1-210335	27913	28068	SAR2_DM	258	403	Simple/Sat/SAT	c	0.698
ctg7180000004040:1-210335	28275	28467	SAR_DM	352	539	Simple/Sat/SAT	c	0.7097
ctg7180000004040:1-210335	28478	28656	SAR2_DM	219	402	Simple/Sat/SAT	c	0.7072
ctg7180000004040:1-210335	28783	28939	SAR2_DM	258	403	Simple/Sat/SAT	c	0.698
ctg7180000004040:1-210335	29257	29341	HAT2_CB	118	204	DNA/hAT	c	0.8125
ctg7180000004040:1-210335	29416	29678	SAR2_DM	151	419	Simple/Sat/SAT	c	0.6908
ctg7180000004040:1-210335	30048	30129	SAR_DM	424	505	Simple/Sat/SAT	c	0.7317
ctg7180000004040:1-210335	30238	30272	SAT-1_DEl	531	565	Simple/Sat/SAT	c	0.8286
ctg7180000004040:1-210335	30277	30377	SAR2_DM	270	374	Simple/Sat/SAT	c	0.7379
ctg7180000004040:1-210335	30868	30993	HAT-N6_Mad	336	454	DNA/hAT	c	0.7377
ctg7180000004040:1-210335	31124	31226	Gypsy-13_DSim-I	4468	4568	LTR/Gypsy	d	0.703
ctg7180000004040:1-210335	31339	31383	DNA6-1_MLP	2424	2469	DNA	d	0.8043
ctg7180000004040:1-210335	31810	31949	EnSpm-1_HM	3050	3166	DNA/EnSpm/CACTA	d	0.7417
ctg7180000004040:1-210335	32277	32305	DNA-8N1_PBa	383	411	DNA	c	0.9655
ctg7180000004040:1-210335	32356	32403	hAT-7_ATr	10367	10412	DNA/hAT	d	0.8085
ctg7180000004040:1-210335	32664	32709	DNA9-3_DR	9390	9435	DNA	c	0.8043
ctg7180000004040:1-210335	32906	33356	SAR2_DM	145	603	Simple/Sat/SAT	c	0.6608
ctg7180000004040:1-210335	33490	33588	SAR_DM	406	505	Simple/Sat/SAT	c	0.67
ctg7180000004040:1-210335	33814	34707	SAR_DM	379	1267	Simple/Sat/SAT	c	0.6678
ctg7180000004040:1-210335	34759	35022	SAR2_DM	153	419	Simple/Sat/SAT	c	0.6943
ctg7180000004040:1-210335	35041	35303	SAR2_DM	153	419	Simple/Sat/SAT	c	0.7094
ctg7180000004040:1-210335	35341	36284	SAR_DM	315	1255	Simple/Sat/SAT	c	0.6613
ctg7180000004040:1-210335	36402	37318	SAR_DM	315	1267	Simple/Sat/SAT	c	0.6553
ctg7180000004040:1-210335	37535	37819	SAR2_DM	153	437	Simple/Sat/SAT	c	0.7113
ctg7180000004040:1-210335	38121	38545	SAR2_DM	1	437	Simple/Sat/SAT	c	0.7019
ctg7180000004040:1-210335	38608	38979	SAR_DM	494	869	Simple/Sat/SAT	c	0.6489
ctg7180000004040:1-210335	39007	39138	SAR_DM	1007	1141	Simple/Sat/SAT	c	0.7197
ctg7180000004040:1-210335	39238	40188	SAR_DM	315	1265	Simple/Sat/SAT	c	0.6627
ctg7180000004040:1-210335	40317	41304	SAR_DM	330	1255	Simple/Sat/SAT	c	0.68
ctg7180000004040:1-210335	41428	41690	SAR2_DM	151	419	Simple/Sat/SAT	c	0.7061
ctg7180000004040:1-210335	41797	42649	SAR_DM	379	1255	Simple/Sat/SAT	c	0.6627
ctg7180000004040:1-210335	42804	42976	SAR2_DM	153	325	Simple/Sat/SAT	c	0.686
ctg7180000004040:1-210335	43245	43531	SAR2_DM	258	540	Simple/Sat/SAT	c	0.7112
ctg7180000004040:1-210335	43682	43778	Helitron-N2_DBi	225	318	DNA/Helitron	c	0.8947
ctg7180000004040:1-210335	43782	43805	Helitron-N2_DBi	231	254	DNA/Helitron	d	1
ctg7180000004040:1-210335	43810	44322	Helitron-N2_DBi	406	962	DNA/Helitron	d	0.7935
ctg7180000004040:1-210335	44385	44475	Harbinger-1_LMi	904	1006	DNA/Harbinger	d	0.7865
ctg7180000004040:1-210335	44615	44677	Crack-7_SP	4830	4896	NonLTR/Crack	c	0.7969
ctg7180000004040:1-210335	44826	44869	COP2_I_MT	4484	4527	LTR/Copia	d	0.7955
ctg7180000004040:1-210335	45024	45091	XDMR	31	98	Simple/Sat/SAT	c	0.7353
ctg7180000004040:1-210335	45419	45573	Gypsy-18_ATr-LTR	1971	2110	LTR/Gypsy	c	0.7397
ctg7180000004040:1-210335	45657	45713	Gypsy-33-I_NVi	5169	5216	LTR/Gypsy	c	0.8824
ctg7180000004040:1-210335	45934	46417	SAR2_DM	71	608	Simple/Sat/SAT	c	0.6897
ctg7180000004040:1-210335	46482	46666	SAR2_DM	136	355	Simple/Sat/SAT	c	0.7219
ctg7180000004040:1-210335	46898	46993	SAR2_DM	320	413	Simple/Sat/SAT	c	0.7604
ctg7180000004040:1-210335	47270	47334	SAT-1_DEl	502	565	Simple/Sat/SAT	c	0.8154
ctg7180000004040:1-210335	47427	47491	SAT-1_DEl	502	565	Simple/Sat/SAT	c	0.8154
ctg7180000004040:1-210335	47720	47769	Vesta2_Av_I	1708	1758	LTR	c	0.7843
ctg7180000004040:1-210335	48217	48355	SLF7-A_LTR	637	772	LTR/Gypsy	d	0.7761
ctg7180000004040:1-210335	48987	49156	Gypsy-24_DEl-I	2674	2833	LTR/Gypsy	d	0.7301
ctg7180000004040:1-210335	51279	51318	Copia-69_BG-I	2500	2539	LTR/Copia	c	0.8
ctg7180000004040:1-210335	52023	52167	Polinton-2_SP	2168	2314	DNA/Polinton	d	0.6824
ctg7180000004040:1-210335	52463	52510	MuDR-7_ALy	13656	13704	DNA/MuDR	d	0.8367
ctg7180000004040:1-210335	53229	53262	P-8_HM	3054	3085	DNA/P	c	0.9091
ctg7180000004040:1-210335	53912	53970	hATm-10_HM	1163	1223	DNA/hAT	c	0.8197
ctg7180000004040:1-210335	56685	56747	Gypsy-6_DTa-I	2273	2334	LTR/Gypsy	c	0.746
ctg7180000004040:1-210335	57523	57552	Copia-8_AIp-I	3237	3266	LTR/Copia	d	0.9333
ctg7180000004040:1-210335	58066	58144	Copia-6_Sit-I	2145	2221	LTR/Copia	d	0.75
ctg7180000004040:1-210335	58399	58465	hAT-5_SSa	3147	3209	DNA/hAT	c	0.7344
ctg7180000004040:1-210335	58635	58673	Gypsy-29_PAb-I	1403	1444	LTR/Gypsy	d	0.875
ctg7180000004040:1-210335	60320	60369	ERV1-1-I_BT	1771	1820	ERV/ERV1	c	0.76
ctg7180000004040:1-210335	61753	61805	ERV2-3_CCr-LTR	253	305	ERV/ERV2	c	0.717
ctg7180000004040:1-210335	61823	61870	Caulimovirus-2_FV	4814	4858	IntegratedVirus/Caulimovirus	d	0.7872
ctg7180000004040:1-210335	62613	62755	RTEX-22_SK	1629	1761	NonLTR/RTEX	c	0.6934
ctg7180000004040:1-210335	62959	63028	Gypsy-1-I_DD	207	271	LTR/Gypsy	d	0.7612
ctg7180000004040:1-210335	64227	64344	hAT-4_PBa	1825	1939	DNA/hAT	d	0.7611
ctg7180000004040:1-210335	64721	64761	rn_364-201_LTR	1221	1261	LTR/Gypsy	d	0.8049
ctg7180000004040:1-210335	66264	66339	Gypsy-25_DWil-I	1257	1325	LTR/Gypsy	d	0.75
ctg7180000004040:1-210335	66368	66456	Tx1-1_CGi	1142	1223	NonLTR/Tx1	c	0.7209
ctg7180000004040:1-210335	66515	66555	Helitron-N120_OS	3966	4006	DNA/Helitron	c	0.8049
ctg7180000004040:1-210335	69011	69061	Gypsy-80_AA-I	248	297	LTR/Gypsy	d	0.8039
ctg7180000004040:1-210335	69945	69999	Gypsy-7_DFi-I	639	697	LTR/Gypsy	c	0.7759
ctg7180000004040:1-210335	70016	70066	BEL-82_CQ-I	282	331	LTR/BEL	c	0.8039
ctg7180000004040:1-210335	71152	71198	Copia-68_NS-I	7082	7128	LTR/Copia	d	0.766
ctg7180000004040:1-210335	71977	72144	EnSpm-2_ALy	6772	6931	DNA/EnSpm/CACTA	d	0.7284
ctg7180000004040:1-210335	72150	72194	I-1_DBi	1263	1307	NonLTR/I	d	0.7778
ctg7180000004040:1-210335	72618	72684	VIHAT2	757	813	DNA/hAT	c	0.8448
ctg7180000004040:1-210335	73604	73707	Ginger1-1_AP	2262	2362	DNA/Ginger1	d	0.7767
ctg7180000004040:1-210335	73728	73782	Helitron-10_OS	897	952	DNA/Helitron	c	0.7679
ctg7180000004040:1-210335	73868	74012	Gypsy9-SM_LTR	47	169	LTR/Gypsy	c	0.7266
ctg7180000004040:1-210335	74015	74067	Gypsy-186_DR-I	1934	1985	LTR/Gypsy	c	0.717
ctg7180000004040:1-210335	74605	74810	TE-X-12_DR	624	826	Multicopy_gene	c	0.6734
ctg7180000004040:1-210335	75252	75287	Gypsy-52_DEl-I	6971	7006	LTR/Gypsy	c	0.8333
ctg7180000004040:1-210335	77935	77992	Helitron-1_SP	4991	5046	DNA/Helitron	c	0.7544
ctg7180000004040:1-210335	79420	79474	L1-91_ACar	1381	1442	NonLTR/L1	d	0.8246
ctg7180000004040:1-210335	80690	80757	Ogre-SD1_LTR	683	750	LTR/Gypsy	c	0.8088
ctg7180000004040:1-210335	81184	81251	L1-26_LSal	3313	3385	NonLTR/L1	c	0.7606
ctg7180000004040:1-210335	81661	81694	Copia-10_PR-I	4278	4311	LTR/Copia	d	0.8824
ctg7180000004040:1-210335	81740	81790	L1-18_XT	1412	1457	NonLTR/L1	c	0.8085
ctg7180000004040:1-210335	82009	82047	CclemV_scCc2	7257	7295	IntegratedVirus/Caulimovirus	c	0.8974
ctg7180000004040:1-210335	83510	83568	Helitron-N2_DBi	13	71	DNA/Helitron	d	0.9492
ctg7180000004040:1-210335	83570	83689	Helitron-N2_DT	234	362	DNA/Helitron	d	0.8293
ctg7180000004040:1-210335	83697	83912	Helitron-N2_DBi	373	588	DNA/Helitron	c	0.912
ctg7180000004040:1-210335	83921	84321	Helitron-N2_DBi	477	961	DNA/Helitron	d	0.7837
ctg7180000004040:1-210335	84767	84847	piggyBac-4_SM	2204	2279	DNA/piggyBac	d	0.7468
ctg7180000004040:1-210335	85234	85294	Mariner-14_HM	1894	1954	DNA/Mariner	c	0.7742
ctg7180000004040:1-210335	85474	85512	ATCOPIA97I	1294	1331	LTR/Copia	d	0.8462
ctg7180000004040:1-210335	85903	85941	PiggyBac-1_FraCyl	2894	2930	DNA/piggyBac	d	0.8421
ctg7180000004040:1-210335	86342	86537	Helitron-N2_DBi	1	211	DNA/Helitron	d	0.9444
ctg7180000004040:1-210335	86538	86588	Helitron-N2_DBi	569	619	DNA/Helitron	d	0.9216
ctg7180000004040:1-210335	86606	86921	Helitron-N2_DBi	637	962	DNA/Helitron	c	0.9495
ctg7180000004040:1-210335	86941	87006	Helitron-N1_DBi	2	67	DNA/Helitron	c	0.8939
ctg7180000004040:1-210335	87422	87694	Helitron-N2_DBi	644	962	DNA/Helitron	d	0.7589
ctg7180000004040:1-210335	87707	87773	Ag-Jen-1	3759	3824	NonLTR/Jockey	c	0.7941
ctg7180000004040:1-210335	88755	88880	hAT-40_SM	585	698	DNA/hAT	c	0.7119
ctg7180000004040:1-210335	89209	89252	L1-61_LSal	606	647	NonLTR/L1	d	0.8605
ctg7180000004040:1-210335	90406	90463	Helitron-N1_DEl	15	73	DNA/Helitron	d	0.7966
ctg7180000004040:1-210335	90546	90596	Gypsy-29_CCri-I	2042	2087	LTR/Gypsy	c	0.8163
ctg7180000004040:1-210335	90597	90635	Copia-111B_CCri-I	2340	2377	LTR/Copia	d	0.8462
ctg7180000004040:1-210335	92302	92338	NonLTR-4_LVa	1414	1453	NonLTR	c	0.9
ctg7180000004040:1-210335	92716	92865	T_Av	2817	2940	NonLTR/Penelope	d	0.7481
ctg7180000004040:1-210335	93691	93785	MUDROS1	610	701	DNA/MuDR	d	0.6915
ctg7180000004040:1-210335	93827	93891	L1MAB_ML	1448	1516	NonLTR/L1	d	0.7612
ctg7180000004040:1-210335	94146	94234	L1-93_ACar	1558	1643	NonLTR/L1	d	0.7176
ctg7180000004040:1-210335	94255	94314	CR1_1a_XT	2920	2977	NonLTR/CR1	c	0.7966
ctg7180000004040:1-210335	94671	94737	ATENSPM5	4480	4551	DNA/EnSpm/CACTA	c	0.7536
ctg7180000004040:1-210335	95262	95324	Gypsy1-SM_LTR	68	129	LTR/Gypsy	d	0.7581
ctg7180000004040:1-210335	95735	95785	Ginger1-2_DR	3548	3602	DNA/Ginger1	d	0.8269
ctg7180000004040:1-210335	97587	97745	EnSpm-N35_DR	331	477	DNA/EnSpm/CACTA	c	0.7703
ctg7180000004040:1-210335	98031	98074	MSAT-2_RPr	701	744	Simple/Sat/MSAT	d	0.8444
ctg7180000004040:1-210335	100467	100554	P-17_HM	523	604	DNA/P	c	0.7529
ctg7180000004040:1-210335	102432	102486	Mariner-24_HSal	282	334	DNA/Mariner	d	0.7963
ctg7180000004040:1-210335	105234	105306	K_As	584	660	NonLTR/Penelope	d	0.7467
ctg7180000004040:1-210335	105400	105441	I-3_DYa	552	592	NonLTR/I	c	0.7857
ctg7180000004040:1-210335	107887	107944	L1-21_ACar	3594	3651	NonLTR/L1	d	0.7414
ctg7180000004040:1-210335	108003	108074	hAT-48_SM	417	498	DNA/hAT	d	0.7297
ctg7180000004040:1-210335	108211	108249	Crack-18_AAe	2088	2126	NonLTR/Crack	d	0.8205
ctg7180000004040:1-210335	108909	108963	ZAM_I	6432	6480	LTR/Gypsy	c	0.86
ctg7180000004040:1-210335	109210	109272	Helitron-N1_DBi	3	72	DNA/Helitron	d	0.8615
ctg7180000004040:1-210335	109276	109313	Helitron-N1_DBi	151	188	DNA/Helitron	d	0.8947
ctg7180000004040:1-210335	109361	109547	REP-2_DTa	38	261	Interspersed_Repeat	c	0.7268
ctg7180000004040:1-210335	109737	109844	Helitron-N1_DEl	157	264	DNA/Helitron	c	0.8037
ctg7180000004040:1-210335	110775	110830	Helitron-N7C_ALy	1539	1592	DNA/Helitron	d	0.7636
ctg7180000004040:1-210335	111307	111360	JN_Av	8364	8420	NonLTR/Penelope	c	0.8
ctg7180000004040:1-210335	111459	111519	GYPSY15-I_AG	1932	1994	LTR/Gypsy	d	0.7937
ctg7180000004040:1-210335	111763	111798	Helitron-N1_DEl	3	38	DNA/Helitron	d	0.8611
ctg7180000004040:1-210335	111975	112061	Kolobok-8_CGi	376	460	DNA/Kolobok	c	0.7273
ctg7180000004040:1-210335	113072	113108	Gypsy10-I_AP	1056	1093	LTR/Gypsy	c	0.8421
ctg7180000004040:1-210335	113497	113573	Helitron-1_DT	189	271	DNA/Helitron	c	0.8718
ctg7180000004040:1-210335	115141	115225	Gyp1_Cis_I	5886	5965	LTR/Gypsy	c	0.725
ctg7180000004040:1-210335	115325	115376	Ag-Outcast-6	4232	4289	NonLTR/Outcast	d	0.7736
ctg7180000004040:1-210335	116835	116919	MuDR-21_VV	6353	6442	DNA/MuDR	c	0.8072
ctg7180000004040:1-210335	116956	117071	Utopia-1_HMM	3697	3800	NonLTR/NeSL	c	0.7523
ctg7180000004040:1-210335	123256	123333	DNA9-N2_DR	4740	4822	DNA	c	0.7284
ctg7180000004040:1-210335	123390	123454	BEL-3_DWil-I	5241	5311	LTR/BEL	d	0.7761
ctg7180000004040:1-210335	123694	123723	BARI1	40	69	DNA/Mariner	c	0.9333
ctg7180000004040:1-210335	123891	123918	DNA-5-1_NV	1421	1448	DNA/hAT	c	0.9643
ctg7180000004040:1-210335	124316	124481	Helitron-N1_DBi	410	587	DNA/Helitron	d	0.8862
ctg7180000004040:1-210335	124764	124800	Gypsy-4_PGr-I	4096	4132	LTR/Gypsy	c	0.8649
ctg7180000004040:1-210335	125220	125259	Copia-8_TC-I	330	370	LTR/Copia	c	0.8293
ctg7180000004040:1-210335	126969	127019	Sola1-N1_AAe	2885	2938	DNA/Sola/Sola1	d	0.8148
ctg7180000004040:1-210335	129360	129392	EnSpm-N6_HM	5042	5074	DNA/EnSpm/CACTA	c	0.9091
ctg7180000004040:1-210335	130931	131019	L1M1_5	3341	3432	NonLTR/L1	c	0.7222
ctg7180000004040:1-210335	131346	131393	LOA_Ele4	939	986	NonLTR/Loa	c	0.8125
ctg7180000004040:1-210335	132100	132158	MuDR-N351_OS	513	578	DNA/MuDR	c	0.7869
ctg7180000004040:1-210335	133019	133787	Helitron-N2_DBi	1	843	DNA/Helitron	d	0.874
ctg7180000004040:1-210335	134342	134446	Gypsy-37_DWil-LTR	642	751	LTR/Gypsy	c	0.7358
ctg7180000004040:1-210335	134733	134794	EnSpm-3_DR	6137	6196	DNA/EnSpm/CACTA	d	0.7581
ctg7180000004040:1-210335	135000	135051	LIN2_SM	3247	3302	NonLTR/NeSL	c	0.7963
ctg7180000004040:1-210335	135864	135977	Medea	5929	6047	DNA/Mariner	d	0.7203
ctg7180000004040:1-210335	135981	136037	I-3_DYa	1550	1606	NonLTR/I	d	0.807
ctg7180000004040:1-210335	136484	136543	Gypsy-43_ATr-LTR	2488	2552	LTR/Gypsy	c	0.7742
ctg7180000004040:1-210335	137046	137154	Polinton-1B_TV	12247	12357	DNA/Polinton	c	0.7207
ctg7180000004040:1-210335	137543	137612	Gypsy-159_AA-I	2927	2988	LTR/Gypsy	d	0.7846
ctg7180000004040:1-210335	137926	137977	EnSpm-21_OS	8998	9049	DNA/EnSpm/CACTA	c	0.7885
ctg7180000004040:1-210335	138027	138072	L1_Av	74	120	NonLTR/Penelope	d	0.8511
ctg7180000004040:1-210335	139402	139482	Gypsy-10_DAn-I	610	692	LTR/Gypsy	c	0.7848
ctg7180000004040:1-210335	139592	139654	DNA43_AFC	941	1001	DNA	c	0.8065
ctg7180000004040:1-210335	141099	141130	Rehavkus-1_NVi	7291	7322	DNA/MuDR	c	0.9062
ctg7180000004040:1-210335	142217	142302	Polinton-1_DEl	1099	1182	DNA/Polinton	c	0.75
ctg7180000004040:1-210335	142603	142703	Polinton-1_DEl	1088	1180	DNA/Polinton	c	0.766
ctg7180000004040:1-210335	143353	143427	Polinton-1_DEl	1099	1171	DNA/Polinton	c	0.7808
ctg7180000004040:1-210335	144836	144928	HETA	337	423	NonLTR/Jockey	c	0.7473
ctg7180000004040:1-210335	145435	145488	TCB2	173	222	DNA/Mariner	c	0.8077
ctg7180000004040:1-210335	145719	145779	LTR-30_CPB-LTR	113	167	LTR	d	0.7719
ctg7180000004040:1-210335	148841	148905	Gypsy-23_VV-I	1300	1363	LTR/Gypsy	c	0.7692
ctg7180000004040:1-210335	149360	149431	Gypsy-62_PAb-I	1094	1162	LTR/Gypsy	d	0.7465
ctg7180000004040:1-210335	150716	150766	Gypsy-16_RO-I	4558	4608	LTR/Gypsy	d	0.7451
ctg7180000004040:1-210335	151623	151674	ERV2-3_Opr-I	3448	3495	ERV/ERV2	d	0.8235
ctg7180000004040:1-210335	152390	152436	Copia20-NVi_I	1829	1874	LTR/Copia	d	0.8298
ctg7180000004040:1-210335	152608	152645	R1-8_BTa	6241	6279	NonLTR/R1	d	0.8462
ctg7180000004040:1-210335	155047	155091	Gypsy-14_LH-I	201	244	LTR/Gypsy	c	0.8
ctg7180000004040:1-210335	156989	157045	Harbinger-N2_PH	393	449	DNA/Harbinger	c	0.7759
ctg7180000004040:1-210335	158727	158818	Helitron-N2_DT	578	678	DNA/Helitron	c	0.7526
ctg7180000004040:1-210335	159479	159530	L2-2_CPB	3200	3249	NonLTR/L2	c	0.8367
ctg7180000004040:1-210335	160306	160433	CR1-23_HM	894	1013	NonLTR/CR1	d	0.7672
ctg7180000004040:1-210335	160504	160555	MuDR1_SM	2292	2340	DNA/MuDR	d	0.8039
ctg7180000004040:1-210335	161383	161450	L1-75_DR	178	248	NonLTR/L1	c	0.7
ctg7180000004040:1-210335	161700	161751	Mariner-3_SLL	2280	2331	DNA/Mariner	d	0.8269
ctg7180000004040:1-210335	161935	161984	Gypsy-14_DWil-I	3197	3249	LTR/Gypsy	c	0.8235
ctg7180000004040:1-210335	162257	162363	REP-2_DTa	1514	1616	Interspersed_Repeat	c	0.7788
ctg7180000004040:1-210335	163012	163056	DNA2-9_CGi	7	50	DNA	d	0.7778
ctg7180000004040:1-210335	163980	164040	Gypsy-1_ECa-I	3120	3176	LTR/Gypsy	d	0.7586
ctg7180000004040:1-210335	164547	164587	L2-14_Hmel	1230	1276	NonLTR/L2	c	0.8605
ctg7180000004040:1-210335	164911	165017	Harbinger-4_TV	809	909	DNA/Harbinger	d	0.7476
ctg7180000004040:1-210335	166064	166148	SHACOP16_I_MT	3031	3120	LTR/Copia	d	0.6897
ctg7180000004040:1-210335	166450	166518	Helitron-2_DRh	5645	5711	DNA/Helitron	c	0.8088
ctg7180000004040:1-210335	166575	166617	Copia-53_NS-I	532	580	LTR/Copia	c	0.8889
ctg7180000004040:1-210335	166633	166681	Helitron-N1_DBi	115	164	DNA/Helitron	c	0.86
ctg7180000004040:1-210335	167848	167956	DNA-10_ALy	132	244	DNA	d	0.7523
ctg7180000004040:1-210335	168625	168672	Jockey-6_BTa	1387	1432	NonLTR/Jockey	c	0.8333
ctg7180000004040:1-210335	168675	168742	TDR17B	540	608	DNA	d	0.7571
ctg7180000004040:1-210335	168799	168889	hATm-48_HM	3790	3875	DNA/hAT	c	0.764
ctg7180000004040:1-210335	169298	169343	Copia-49_BG-LTR	61	110	LTR/Copia	d	0.8367
ctg7180000004040:1-210335	170144	170194	Polinton-1_PI	1049	1098	DNA/Polinton	c	0.8039
ctg7180000004040:1-210335	170611	170648	Gypsy-3_PBa-I	591	628	LTR/Gypsy	c	0.8684
ctg7180000004040:1-210335	170701	170741	COPIA1-LTR_LC	216	256	LTR/Copia	c	0.7805
ctg7180000004040:1-210335	171747	171827	CR1-1_DEu	3381	3459	NonLTR/CR1	d	0.6875
ctg7180000004040:1-210335	171839	171905	NonLTR-5_CR	1970	2040	NonLTR	d	0.6957
ctg7180000004040:1-210335	174711	174765	MER72B_Mim	461	516	ERV/ERV1	d	0.75
ctg7180000004040:1-210335	176236	176281	CACTA-1_CapOwc	735	783	DNA/EnSpm/CACTA	d	0.8542
ctg7180000004040:1-210335	176665	176730	Mariner-48_LSal	1333	1403	DNA/Mariner	d	0.7941
ctg7180000004040:1-210335	177262	177331	P-14_HM	2349	2413	DNA/P	c	0.7794
ctg7180000004040:1-210335	178015	178057	Gypsy-22_ATr-I	2246	2287	LTR/Gypsy	c	0.814
ctg7180000004040:1-210335	178229	178320	L3_Av	9166	9257	NonLTR/Penelope	c	0.7614
ctg7180000004040:1-210335	179006	179099	Nimb-3_PH	179	273	NonLTR/Nimb	d	0.7717
ctg7180000004040:1-210335	179700	179784	ENSPM_MT	1592	1679	DNA/EnSpm/CACTA	c	0.75
ctg7180000004040:1-210335	180024	180070	Ogre-MT3_I	6194	6239	LTR/Gypsy	d	0.8478
ctg7180000004040:1-210335	180672	180708	DNA-8-4_DR	655	690	DNA/hAT	c	0.8378
ctg7180000004040:1-210335	181535	181600	SAT-23_DR	685	746	Simple/Sat/SAT	c	0.7937
ctg7180000004040:1-210335	181647	181726	Gypsy98-LTR_Dr	168	241	LTR/Gypsy	d	0.7403
ctg7180000004040:1-210335	181964	182040	EnSpm-17_OS	9861	9945	DNA/EnSpm/CACTA	d	0.7284
ctg7180000004040:1-210335	182077	182140	CR1-Y_Pass	1501	1570	NonLTR/CR1	d	0.7846
ctg7180000004040:1-210335	182758	182812	Helitron-N3_ALy	1078	1131	DNA/Helitron	d	0.7636
ctg7180000004040:1-210335	184190	184229	ERV1-2_AMi-I	4257	4297	ERV/ERV1	d	0.8293
ctg7180000004040:1-210335	184423	184476	MuDR-79_OS	7432	7482	DNA/MuDR	c	0.8113
ctg7180000004040:1-210335	185595	185622	Gypsy-30_ALY-I	121	148	LTR/Gypsy	c	0.9286
ctg7180000004040:1-210335	185958	186002	Copia-76_SB-I	3133	3174	LTR/Copia	c	0.8409
ctg7180000004040:1-210335	186401	186486	MuDR-1_LMi	2644	2724	DNA/MuDR	d	0.7284
ctg7180000004040:1-210335	186761	186819	Gypsy-187_OS-I	4195	4256	LTR/Gypsy	d	0.7167
ctg7180000004040:1-210335	186832	186873	Helitron-3_ALy	2074	2114	DNA/Helitron	c	0.8333
ctg7180000004040:1-210335	187002	187043	Copia-1_CMe-I	642	683	LTR/Copia	c	0.8333
ctg7180000004040:1-210335	187138	187186	SFV1-6_Crp-I	884	933	ERV/ERV4	c	0.8
ctg7180000004040:1-210335	187279	187314	MuDR-13_OS	7355	7390	DNA/MuDR	d	0.8333
ctg7180000004040:1-210335	187396	187600	Ag-Jock-1	1280	1480	NonLTR/Jockey	c	0.7413
ctg7180000004040:1-210335	189092	189201	Helitron-N99B_OS	3789	3911	DNA/Helitron	d	0.7699
ctg7180000004040:1-210335	189256	189316	ENSPM-6_DR	13064	13127	DNA/EnSpm/CACTA	d	0.7778
ctg7180000004040:1-210335	189636	189683	BURRO2_I	2333	2378	LTR/Gypsy	d	0.7872
ctg7180000004040:1-210335	190436	190478	Gypsy10-PTR_I	604	646	LTR/Gypsy	c	0.814
ctg7180000004040:1-210335	191524	191560	Gypsy59-LTR_DR	570	611	LTR/Gypsy	d	0.8974
ctg7180000004040:1-210335	193033	193139	EdSINE1	328	430	NonLTR/SINE	d	0.7404
ctg7180000004040:1-210335	193183	193240	L1-34_ACar	4928	4983	NonLTR/L1	c	0.7414
ctg7180000004040:1-210335	194779	194835	MuDR-86_OS	11848	11896	DNA/MuDR	d	0.8431
ctg7180000004040:1-210335	195067	195129	JVY_As	16102	16168	NonLTR/Penelope	c	0.7385
ctg7180000004040:1-210335	196594	196650	LTR-12B1_Crp	1850	1906	LTR	c	0.7586
ctg7180000004040:1-210335	196675	196758	Copia-1_LH-LTR	57	139	LTR/Copia	c	0.6941
ctg7180000004040:1-210335	197740	197830	RTE-16_SP	1740	1819	NonLTR/RTE	c	0.7229
ctg7180000004040:1-210335	198674	198733	hAT-25_ZM	434	496	DNA/hAT	c	0.7742
ctg7180000004040:1-210335	198991	199019	MuDR-N78H_OS	1498	1526	DNA/MuDR	d	0.8966
ctg7180000004040:1-210335	199228	199299	REP-4_PBa	521	593	Interspersed_Repeat	c	0.7534
ctg7180000004040:1-210335	199754	199795	Copia-7_ES-I	3376	3419	LTR/Copia	c	0.8372
ctg7180000004040:1-210335	201304	201393	Gypsy-75_NS-LTR	41	129	LTR/Gypsy	d	0.7701
ctg7180000004040:1-210335	201983	202038	DNA-TA-20A_NV	1274	1325	DNA	d	0.7778
ctg7180000004040:1-210335	202195	202225	hAT-21_OS	2725	2754	DNA/hAT	c	0.9355
ctg7180000004040:1-210335	202239	202292	ERV1-1_CCr-I	3376	3431	ERV/ERV1	d	0.75
ctg7180000004040:1-210335	202603	202647	Gypsy-11_RO-LTR	612	658	LTR/Gypsy	d	0.8261
ctg7180000004040:1-210335	202791	202847	Harbinger-71_CCri	2512	2568	DNA/Harbinger	d	0.7544
ctg7180000004040:1-210335	202851	203003	Gypsy-11-I_CR	8333	8494	LTR/Gypsy	d	0.6795
ctg7180000004040:1-210335	203843	203899	LTR1B34a_CHo	254	310	ERV/ERV3	d	0.7586
ctg7180000004040:1-210335	203947	204012	hAT-1_ESi	4650	4711	DNA/hAT	d	0.8125
ctg7180000004040:1-210335	204048	204121	hAT-N87_OS	502	582	DNA/hAT	d	0.7273
ctg7180000004040:1-210335	204185	204221	Gypsy-70_CGi-I	258	294	LTR/Gypsy	d	0.8649
ctg7180000004040:1-210335	205017	205058	Helitron-N12D_OS	897	938	DNA/Helitron	c	0.7857
ctg7180000004040:1-210335	206170	206240	L1-64_ACar	2795	2860	NonLTR/L1	d	0.7571
ctg7180000004040:1-210335	206248	206301	Mariner-2_DAn	1440	1495	DNA/Mariner	c	0.8036
ctg7180000004040:1-210335	206901	206943	BEL-10_DAn-I	3952	3995	LTR/BEL	d	0.8182
ctg7180000004040:1-210335	208205	208282	Gypsy-33_GR-I	1164	1256	LTR/Gypsy	d	0.7805
ctg7180000004040:1-210335	208307	208422	Utopia-1_PMi	789	911	NonLTR/NeSL	d	0.675
ctg7180000004040:1-210335	208810	208889	Gypsy-232_OS-LTR	1846	1919	LTR/Gypsy	c	0.7051

## Sheet: 3L
Table S6. Repbase annotation of four telomeres from D. biarmipes.
Telomeric_Contig	start_position_on_contig	end_position_on_contig	TE	start_position_on_TE	end_position_on_TE	TE_Class	Sense(direct or complentary)	Identity_to_Repbase_consensus
ctg7180000002989:1-56609	123	171	Mariner-3_HM	539	587	DNA/Mariner	c	0.7551
ctg7180000002989:1-56609	489	569	XDMR	15	98	Simple/Sat/SAT	c	0.7561
ctg7180000002989:1-56609	846	1046	Gypsy-12_ATr-LTR	2226	2430	LTR/Gypsy	c	0.7286
ctg7180000002989:1-56609	1138	1186	ATCOPIA16I	1803	1852	LTR/Copia	d	0.8163
ctg7180000002989:1-56609	1478	1725	IMPB_01	173	411	Simple/Sat	c	0.6872
ctg7180000002989:1-56609	2869	2957	XDMR	2	98	Simple/Sat/SAT	c	0.7582
ctg7180000002989:1-56609	3025	3073	ATCOPIA16I	1803	1852	LTR/Copia	d	0.8367
ctg7180000002989:1-56609	3396	3609	Ginger2-1_LS	814	1028	DNA/Ginger2	c	0.7028
ctg7180000002989:1-56609	4513	4591	hAT-17_DR	2496	2584	DNA/hAT	c	0.7381
ctg7180000002989:1-56609	4754	4842	XDMR	2	98	Simple/Sat/SAT	c	0.7582
ctg7180000002989:1-56609	4910	4958	ATCOPIA16I	1803	1852	LTR/Copia	d	0.8367
ctg7180000002989:1-56609	5205	5491	Gypsy-12_ATr-LTR	3102	3353	LTR/Gypsy	c	0.705
ctg7180000002989:1-56609	6790	6838	ATCOPIA16I	1803	1852	LTR/Copia	d	0.8367
ctg7180000002989:1-56609	7129	7375	IMPB_01	173	411	Simple/Sat	c	0.679
ctg7180000002989:1-56609	8520	8608	XDMR	2	98	Simple/Sat/SAT	c	0.7582
ctg7180000002989:1-56609	8611	8688	Gypsy-20_RC-I	6409	6485	LTR/Gypsy	d	0.7273
ctg7180000002989:1-56609	8704	8736	EnSpm-29_OS	4095	4127	DNA/EnSpm/CACTA	c	0.9091
ctg7180000002989:1-56609	8879	9080	Gypsy-12_ATr-LTR	1991	2169	LTR/Gypsy	c	0.7433
ctg7180000002989:1-56609	9172	9220	ATCOPIA16I	1803	1852	LTR/Copia	d	0.8163
ctg7180000002989:1-56609	9482	9737	IMPB_01	170	405	Simple/Sat	c	0.6749
ctg7180000002989:1-56609	10033	10083	Copia-34_OS-I	1151	1202	LTR/Copia	c	0.8235
ctg7180000002989:1-56609	10712	10901	RMER17D_MM	302	476	LTR	c	0.7207
ctg7180000002989:1-56609	11245	11293	ATCOPIA16I	1803	1852	LTR/Copia	d	0.8163
ctg7180000002989:1-56609	11539	11809	Gypsy-14_ATr-LTR	1589	1832	LTR/Gypsy	c	0.7068
ctg7180000002989:1-56609	12105	12155	Copia-34_OS-I	1151	1202	LTR/Copia	c	0.8235
ctg7180000002989:1-56609	12784	12973	RMER17D_MM	302	476	LTR	c	0.7207
ctg7180000002989:1-56609	14011	14087	Gypsy-25_LBS-I	14619	14689	LTR/Gypsy	c	0.7733
ctg7180000002989:1-56609	14392	14481	Medea	6666	6754	DNA/Mariner	c	0.75
ctg7180000002989:1-56609	14538	14735	XDMR	1	202	Simple/Sat/SAT	c	0.6633
ctg7180000002989:1-56609	15005	15115	SAR_DM	397	505	Simple/Sat/SAT	c	0.7248
ctg7180000002989:1-56609	15180	15249	EnSpm-1_DDi	1321	1389	DNA/EnSpm/CACTA	d	0.7353
ctg7180000002989:1-56609	15513	15612	Kiri-2_HMM	2610	2704	NonLTR/Kiri	d	0.732
ctg7180000002989:1-56609	16144	16336	Gypsy-12_ATr-LTR	3248	3417	LTR/Gypsy	c	0.7102
ctg7180000002989:1-56609	16412	16498	IBGYPSY1_I	426	513	LTR/Gypsy	d	0.7412
ctg7180000002989:1-56609	16586	16683	SAR_DM	406	505	Simple/Sat/SAT	c	0.69
ctg7180000002989:1-56609	17077	17147	Zisupton-6_DR	2892	2962	DNA/Zisupton	c	0.8
ctg7180000002989:1-56609	18000	18079	Copia-28_Pru-I	6235	6306	LTR/Copia	c	0.7467
ctg7180000002989:1-56609	18536	18733	XDMR	1	202	Simple/Sat/SAT	c	0.6633
ctg7180000002989:1-56609	18973	19112	SAR2_DM	278	419	Simple/Sat/SAT	c	0.7286
ctg7180000002989:1-56609	19348	19447	Dada-U6_DR	7061	7147	DNA/Dada	c	0.764
ctg7180000002989:1-56609	19942	20134	Gypsy-12_ATr-LTR	3248	3417	LTR/Gypsy	c	0.7102
ctg7180000002989:1-56609	20210	20321	IBGYPSY1_I	426	543	LTR/Gypsy	d	0.7257
ctg7180000002989:1-56609	20383	20480	SAR_DM	406	505	Simple/Sat/SAT	c	0.7
ctg7180000002989:1-56609	21141	21430	Polinton-1_SM	14123	14437	DNA/Polinton	d	0.7138
ctg7180000002989:1-56609	21491	21530	L1-22_NN	5152	5191	NonLTR/L1	d	0.878
ctg7180000002989:1-56609	21728	21771	TTAA20B_AP	194	235	DNA	d	0.8605
ctg7180000002989:1-56609	22146	22205	Mariner-1_AP	2027	2092	DNA/Mariner	c	0.7742
ctg7180000002989:1-56609	22797	22896	Dada-U6_DR	7061	7147	DNA/Dada	c	0.7528
ctg7180000002989:1-56609	23179	23246	MuDR-1_DF	7811	7883	DNA/MuDR	c	0.7536
ctg7180000002989:1-56609	23489	23681	Gypsy-12_ATr-LTR	3248	3417	LTR/Gypsy	c	0.7102
ctg7180000002989:1-56609	23933	24031	SAR_DM	406	505	Simple/Sat/SAT	c	0.7
ctg7180000002989:1-56609	24526	24647	L1-10_SSa	5600	5732	NonLTR/L1	d	0.6929
ctg7180000002989:1-56609	25360	25439	Copia-28_Pru-I	6235	6306	LTR/Copia	c	0.7467
ctg7180000002989:1-56609	25684	25890	SAR2_DM	136	338	Simple/Sat/SAT	c	0.6569
ctg7180000002989:1-56609	25965	26108	BEL-14_DAn-I	1015	1149	LTR/BEL	c	0.705
ctg7180000002989:1-56609	26800	26839	L1-22_NN	5152	5191	NonLTR/L1	d	0.878
ctg7180000002989:1-56609	26981	27086	CR1-2_DAn	419	505	NonLTR/CR1	d	0.8427
ctg7180000002989:1-56609	27176	27528	SAR2_DM	258	603	Simple/Sat/SAT	c	0.6481
ctg7180000002989:1-56609	27659	27740	Hoana8	2723	2815	DNA/hAT	c	0.747
ctg7180000002989:1-56609	27752	27821	EnSpm-1_DDi	1321	1389	DNA/EnSpm/CACTA	d	0.75
ctg7180000002989:1-56609	27940	27986	L1-73_ACar	5096	5142	NonLTR/L1	d	0.7872
ctg7180000002989:1-56609	28688	28823	Polinton3_SM	2686	2813	DNA/Polinton	d	0.7519
ctg7180000002989:1-56609	28978	29107	Gypsy-12_ATr-LTR	3379	3508	LTR/Gypsy	c	0.6953
ctg7180000002989:1-56609	29600	29780	Helitron-N2_DBi	170	342	DNA/Helitron	c	0.7384
ctg7180000002989:1-56609	29781	29867	Helitron-N1_DBi	1	87	DNA/Helitron	c	0.8621
ctg7180000002989:1-56609	32372	32432	Copia-78_ALY-LTR	52	114	LTR/Copia	c	0.746
ctg7180000002989:1-56609	32917	33014	DNA9-N2_DR	4334	4432	DNA	c	0.7292
ctg7180000002989:1-56609	35583	35626	Copia-63_PPe-I	1096	1139	LTR/Copia	d	0.8182
ctg7180000002989:1-56609	35632	35684	Copia-24_MN-I	2409	2457	LTR/Copia	c	0.7885
ctg7180000002989:1-56609	35819	35890	LTR-22_DR-LTR	53	124	LTR	c	0.7639
ctg7180000002989:1-56609	38322	38427	Copia-20_GR-LTR	79	172	LTR/Copia	c	0.7857
ctg7180000002989:1-56609	38645	38739	L1-26_ACar	3562	3667	NonLTR/L1	d	0.7071
ctg7180000002989:1-56609	39430	39513	LOOPER-N5B_DR	1092	1178	DNA/Kolobok	c	0.7093
ctg7180000002989:1-56609	39728	39772	MuDR-9_ALy	3220	3264	DNA/MuDR	c	0.7556
ctg7180000002989:1-56609	43376	43417	Gypsy-22_Mad-I	3172	3215	LTR/Gypsy	d	0.8409
ctg7180000002989:1-56609	44387	45191	Helitron-N2_DBi	1	962	DNA/Helitron	d	0.8462
ctg7180000002989:1-56609	46387	46464	Tx1-20_DR	3624	3698	NonLTR/Tx1	c	0.7595
ctg7180000002989:1-56609	47738	47793	Copia-28_CCri-I	1113	1167	LTR/Copia	d	0.75
ctg7180000002989:1-56609	49358	49407	L2-3_HRo	296	345	NonLTR/L2	c	0.78
ctg7180000002989:1-56609	51755	51832	Gypsy-42_MN-I	61	126	LTR/Gypsy	c	0.7536
ctg7180000002989:1-56609	53698	53726	Tx1-3_PM	921	949	NonLTR/Tx1	c	0.9655
ctg7180000002989:1-56609	55545	55592	EnSpm-N4_OS	324	369	DNA/EnSpm/CACTA	d	0.8511
ctg7180000002989:1-56609	56348	56492	Copia-6_MLP-I	2124	2258	LTR/Copia	d	0.7214

## Sheet: 3R
Table S6. Repbase annotation of four telomeres from D. biarmipes long read-assembled genome.
Telomeric_Contig	start_position_on_contig	end_position_on_contig	TE	start_position_on_TE	end_position_on_TE	TE_Class	Sense(direct or complentary)	Identity_to_Repbase_consensus
ctg7180000003943:13576-29282	542	612	MuDr-1x_AP	274	342	DNA/MuDR	d	0.7857
ctg7180000003943:13576-29282	996	1272	Ginger2-1_LS	786	1022	DNA/Ginger2	d	0.739
ctg7180000003943:13576-29282	1626	1689	HAL1-1E_Cpo	2830	2892	NonLTR/L1	d	0.75
ctg7180000003943:13576-29282	1883	1922	ATCOPIA16I	1814	1852	LTR/Copia	c	0.85
ctg7180000003943:13576-29282	1952	2080	XDMR	15	169	Simple/Sat/SAT	d	0.75
ctg7180000003943:13576-29282	2370	2443	MuDr-1x_AP	257	323	DNA/MuDR	c	0.7746
ctg7180000003943:13576-29282	2681	2718	Copia-79_BG-I	1460	1497	LTR/Copia	c	0.8421
ctg7180000003943:13576-29282	3351	3425	Gypsy-4_CGi-I	1480	1552	LTR/Gypsy	d	0.7333
ctg7180000003943:13576-29282	3587	3671	EnSpm-N13_DR	5737	5821	DNA/EnSpm/CACTA	d	0.7907
ctg7180000003943:13576-29282	3800	3872	MuDR-N2_TV	1509	1586	DNA/MuDR	c	0.7368
ctg7180000003943:13576-29282	4077	4397	Gypsy-7N_PPa-LTR	1073	1367	LTR/Gypsy	c	0.6743
ctg7180000003943:13576-29282	5387	5801	Gypsy-12_ATr-LTR	2963	3382	LTR/Gypsy	d	0.6983
ctg7180000003943:13576-29282	6038	6086	ATCOPIA16I	1803	1852	LTR/Copia	c	0.8367
ctg7180000003943:13576-29282	6287	6345	DNA-39_LSal	711	767	DNA	d	0.7931
ctg7180000003943:13576-29282	6397	6525	XDMR	15	169	Simple/Sat/SAT	d	0.7424
ctg7180000003943:13576-29282	6688	6736	Penelope-6_OD	418	464	NonLTR/Penelope	c	0.8333
ctg7180000003943:13576-29282	7127	7164	Copia-79_BG-I	1460	1497	LTR/Copia	c	0.8421
ctg7180000003943:13576-29282	7261	7304	Gypsy5-NVi_I	1566	1614	LTR/Gypsy	c	0.8444
ctg7180000003943:13576-29282	7799	7873	Gypsy-4_CGi-I	1480	1552	LTR/Gypsy	d	0.7333
ctg7180000003943:13576-29282	8040	8124	EnSpm-N13_DR	5737	5821	DNA/EnSpm/CACTA	d	0.8023
ctg7180000003943:13576-29282	8368	8419	BEL-1_CSa-I	3760	3818	LTR/BEL	d	0.8148
ctg7180000003943:13576-29282	8440	8502	DNA2-4_CGi	4539	4596	DNA	d	0.7627
ctg7180000003943:13576-29282	8552	8853	EnSpm-2_SIt	6317	6598	DNA/EnSpm/CACTA	c	0.7433
ctg7180000003943:13576-29282	9397	9480	Caulimovirus-11_ATr	1353	1438	IntegratedVirus/Caulimovirus	c	0.7711
ctg7180000003943:13576-29282	9823	10237	Gypsy-12_ATr-LTR	3102	3474	LTR/Gypsy	d	0.7275
ctg7180000003943:13576-29282	10474	10522	ATCOPIA16I	1803	1852	LTR/Copia	c	0.8367
ctg7180000003943:13576-29282	10767	10806	ATCOPIA16I	1814	1852	LTR/Copia	c	0.85
ctg7180000003943:13576-29282	10823	10966	XDMR	7	169	Simple/Sat/SAT	d	0.7643
ctg7180000003943:13576-29282	11257	11330	MuDr-1x_AP	257	323	DNA/MuDR	c	0.7606
ctg7180000003943:13576-29282	11570	11608	Copia-79_BG-I	1460	1498	LTR/Copia	c	0.8462
ctg7180000003943:13576-29282	12678	12740	EnSpm-N10_HM	3640	3712	DNA/EnSpm/CACTA	c	0.803
ctg7180000003943:13576-29282	12829	12927	Gypsy-19_DAn-LTR	921	1026	LTR/Gypsy	d	0.7745
ctg7180000003943:13576-29282	13058	13260	Gypsy-7N_PPa-LTR	1168	1366	LTR/Gypsy	c	0.665
ctg7180000003943:13576-29282	13449	13536	Gypsy-102_AA-I	425	516	LTR/Gypsy	c	0.7701
ctg7180000003943:13576-29282	14002	14240	MuDR-5_GR	519	745	DNA/MuDR	d	0.75
ctg7180000003943:13576-29282	14592	14681	SMAR2	1974	2055	DNA/Mariner	c	0.8052
ctg7180000003943:13576-29282	14866	14934	Helitron-N1_ZM	200	263	DNA/Helitron	c	0.7727
ctg7180000003943:13576-29282	14980	15203	EnSpm2_SB	6870	7081	DNA/EnSpm/CACTA	c	0.707
ctg7180000003943:13576-29282	15224	15484	MuDR-5_GR	308	533	DNA/MuDR	c	0.7554
ctg7180000003021:1-32188	145	314	Kolobok-3_Aplcal	655	813	DNA/Kolobok	c	0.7178
ctg7180000003021:1-32188	487	717	SAR2_DM	299	539	Simple/Sat/SAT	c	0.6835
ctg7180000003021:1-32188	793	1056	SAR2_DM	151	419	Simple/Sat/SAT	c	0.7068
ctg7180000003021:1-32188	1122	1303	SAR2_DM	255	436	Simple/Sat/SAT	c	0.7322
ctg7180000003021:1-32188	1430	1479	Copia-105_GM-I	4596	4648	LTR/Copia	d	0.8077
ctg7180000003021:1-32188	1729	1828	Dada-U6_DR	7061	7147	DNA/Dada	c	0.764
ctg7180000003021:1-32188	2111	2183	MuDR-N2_TV	940	1017	DNA/MuDR	d	0.8082
ctg7180000003021:1-32188	2854	2956	Polinton-1_SM	14604	14706	DNA/Polinton	c	0.7379
ctg7180000003021:1-32188	3684	3742	Gypsy-41_GA-I	221	280	LTR/Gypsy	c	0.7167
ctg7180000003021:1-32188	4012	4350	SAR2_DM	2	338	Simple/Sat/SAT	c	0.6537
ctg7180000003021:1-32188	5195	5294	Dada-U6_DR	7061	7147	DNA/Dada	c	0.764
ctg7180000003021:1-32188	5570	5639	MuDR-N2_TV	940	1016	DNA/MuDR	d	0.7746
ctg7180000003021:1-32188	5908	6080	Gypsy-53_PM-LTR	396	566	LTR/Gypsy	d	0.6724
ctg7180000003021:1-32188	7147	7205	Gypsy-41_GA-I	221	280	LTR/Gypsy	c	0.7167
ctg7180000003021:1-32188	7605	7687	Kolobok-N1_AEc	6040	6108	DNA/Kolobok	d	0.7973
ctg7180000003021:1-32188	7886	7955	EnSpm-1_DDi	1321	1389	DNA/EnSpm/CACTA	d	0.7353
ctg7180000003021:1-32188	8256	8356	Dada-U6_DR	7061	7147	DNA/Dada	c	0.7416
ctg7180000003021:1-32188	8959	9087	Gypsy-14_ATr-LTR	1580	1700	LTR/Gypsy	c	0.7063
ctg7180000003021:1-32188	10215	10273	Gypsy-41_GA-I	221	280	LTR/Gypsy	c	0.7167
ctg7180000003021:1-32188	10544	10618	SAR2_DM	264	338	Simple/Sat/SAT	c	0.7368
ctg7180000003021:1-32188	10674	10756	Kolobok-N1_AEc	6040	6108	DNA/Kolobok	d	0.7973
ctg7180000003021:1-32188	10954	11023	EnSpm-1_DDi	1321	1389	DNA/EnSpm/CACTA	d	0.7353
ctg7180000003021:1-32188	11325	11425	Dada-U6_DR	7061	7147	DNA/Dada	c	0.7416
ctg7180000003021:1-32188	12048	12220	Gypsy-53_PM-LTR	396	566	LTR/Gypsy	d	0.6724
ctg7180000003021:1-32188	12937	13236	ERE1_ED	1330	1625	Interspersed_Repeat	d	0.7177
ctg7180000003021:1-32188	13282	13340	Gypsy-41_GA-I	221	280	LTR/Gypsy	c	0.7167
ctg7180000003021:1-32188	13611	13950	SAR2_DM	2	338	Simple/Sat/SAT	c	0.6646
ctg7180000003021:1-32188	14683	14832	Gypsy-14_ATr-LTR	1592	1723	LTR/Gypsy	c	0.7279
ctg7180000003021:1-32188	15121	15264	BEL-14_DAn-I	1015	1149	LTR/BEL	c	0.7174
ctg7180000003021:1-32188	15562	15853	Polinton-1_SM	14123	14437	DNA/Polinton	d	0.7245
ctg7180000003021:1-32188	15906	15964	Gypsy-41_GA-I	221	280	LTR/Gypsy	c	0.7167
ctg7180000003021:1-32188	16234	16573	SAR2_DM	2	338	Simple/Sat/SAT	c	0.6518
ctg7180000003021:1-32188	17408	17498	Mariner-N5C_DR	1454	1546	DNA/Mariner	d	0.7234
ctg7180000003021:1-32188	17558	17645	Polinton-6_SM	4922	5014	DNA/Polinton	d	0.7033
ctg7180000003021:1-32188	17899	18087	Gypsy-14_ATr-LTR	1535	1700	LTR/Gypsy	c	0.6994
ctg7180000003021:1-32188	18274	18424	SAR_DM	399	544	Simple/Sat/SAT	c	0.7415
ctg7180000003021:1-32188	18515	18562	ATLINE1_6	4486	4533	NonLTR/L1	c	0.8125
ctg7180000003021:1-32188	18663	18725	Harbinger-8_CGi	861	918	DNA/Harbinger	c	0.8197
ctg7180000003021:1-32188	18999	19075	piggyBacA-1_DPur	310	382	DNA/piggyBac	c	0.76
ctg7180000003021:1-32188	19293	19585	Gypsy-3_DRh-I	731	1026	LTR/Gypsy	c	0.7049
ctg7180000003021:1-32188	19685	19738	LTR71B_ML	192	246	ERV/ERV1	d	0.7636
ctg7180000003021:1-32188	20793	20851	EnSpm-9_DR	853	906	DNA/EnSpm/CACTA	d	0.7679
ctg7180000003021:1-32188	21208	21250	MuDR-64_OS	916	958	DNA/MuDR	c	0.8636
ctg7180000003021:1-32188	22877	22925	MuDR-34_PI	1019	1068	DNA/MuDR	c	0.76
ctg7180000003021:1-32188	23096	23190	I-7_DBp	3385	3474	NonLTR/I	c	0.7582
ctg7180000003021:1-32188	23774	23868	Gypsy-86_PAb-I	3511	3602	LTR/Gypsy	c	0.7391
ctg7180000003021:1-32188	24142	24232	Mariner-1_AAe	2444	2529	DNA/Mariner	c	0.7191
ctg7180000003021:1-32188	24466	24523	EnSpm-7_STu	2653	2710	DNA/EnSpm/CACTA	c	0.8276
ctg7180000003021:1-32188	24551	24649	Chapaev-3B_HM	2041	2139	DNA/EnSpm/CACTA	d	0.732
ctg7180000003021:1-32188	24784	24867	SMAR25	94	173	DNA/Mariner	c	0.75
ctg7180000003021:1-32188	26740	26776	Gypsy-23_DWil-I	2814	2850	LTR/Gypsy	d	0.8108
ctg7180000003021:1-32188	26851	26886	RTE-17_LMi	150	185	NonLTR/RTE	c	0.8889
ctg7180000003021:1-32188	26888	26943	IAPLTR1a_I_MM	269	325	ERV/ERV2	d	0.8036
ctg7180000003021:1-32188	27147	27201	Copia-49_ALY-I	2362	2418	LTR/Copia	c	0.7857
ctg7180000003021:1-32188	27576	27621	Helitron-1_DEu	1	46	DNA/Helitron	d	0.913
ctg7180000003021:1-32188	28072	28121	Copia-3_SSa-LTR	202	254	LTR/Copia	d	0.7692
ctg7180000003021:1-32188	29845	29914	hATx-23_SM	1390	1456	DNA/hAT	c	0.7391
ctg7180000003021:1-32188	30757	30795	hAT-1N_DP	398	434	DNA/hAT	d	0.8684
ctg7180000003021:1-32188	31200	31257	L1-80_ACar	5562	5622	NonLTR/L1	c	0.7869
