# Supplementary material for: Diversification and collapse of a telomere elongation mechanism
Source: HighWire-hosted journal article supplement (doi:10.1101/gr.245001.118), 2019-05-28
Supplement: Supplemental_Table_S8.xlsx [file Supplemental_Table_S8.xlsx]

## Sheet: pipeline_statistics
Table S8. Summary statistics of pipeline output from round 1 and round 2.
		Round 1					Round 2
Species	Genome_reads	reads recoved from BLAST (80% threshold)	# de novo consensus sequences assembled	# consensus seqs retained post-tree sort	mean consensus length	consensus length stdev	reads recoved from BLAST (80% threshold)	# de novo consensus sequences assembled	# consensus seqs retained post-tree sort	mean consensus length	consensus length stdev
D. ananassae	3895526	311	43	5	3145.6	1056.8	4284	95	6	1372.6	410.8
D. biarmipes	18679137	1443	162	20	3242.1	1368.4	138754	3538	61	762	254.9
D. elegans	18931036	4514	414	59	4587.7	1363.9	280778	10424	303	2089.9	1690.8
D. ficusphila	16177421	3758	334	44	3600	1380.4	220936	7785	192	1130.7	757.4
D. melanogaster	4707439	20571	660	86	1534.1	1630.2	84073	4814	175	196.5	295.3
D. rhopaloa	17541298	4774	366	63	3709.6	1687.1	378711	15084	505	1191.6	637.3
D. sechellia	1218270	4779	625	38	5989.3	2261.8	25243	2297	407	2108.6	651.6
D. simulans	2424141	5651	835	59	5778.4	2438.7	94733	3884	510	2078.4	741.8
D. takahashii	20271367	3250	341	33	3013.2	1189.4	283083	8303	58	2185.9	1138.4
D. yakuba	2245197	5092	803	75	6831	2190	136125	6159	895	2192.5	738.1
