# Supplementary material for: Diversification and collapse of a telomere elongation mechanism
Source: HighWire-hosted journal article supplement (doi:10.1101/gr.245001.118), 2019-05-28
Supplement: Supplemental_Table_S9.xlsx [file Supplemental_Table_S9.xlsx]

## Sheet: Sheet1
Table S9. Drosophila species stocks used in PCR- and cytology- based validation, including the D. biarmipes stock subjected to single molecule sequencing (The National Drosophila Species Stock Center, Ithaca, NY).
species	stock	experiments
D. melanogaster	w11118	PCR, FISH
D. melanogaster	y; cn bw; sp	qPCR
D. simulans	w501	qPCR
D. takahashii	DSSC 14023-0361.11	PCR
D. rhopaloa	DSSC 14029-0021.01	PCR, qPCR, FISH, oligopaint
D. ficusphila	DSSC 14025-0441.05	PCR
D. elegans	DSSC 14027-0461.03	PCR, oligopaint
D. biarmipes	DSSC 14023-0361.11	PCR, FISH, PacBio
D. ananassae	DSSC 14024-0371.31	PCR
