# Supplementary material for: Diversification and collapse of a telomere elongation mechanism
Source: HighWire-hosted journal article supplement (doi:10.1101/gr.245001.118), 2019-05-28
Supplement: Supplemental_Table_S10.xlsx [file Supplemental_Table_S10.xlsx]

## Sheet: PCR+Sequencing_Primers
Table S10. Primers for PCR and RT-qPCR as well as FISH probe and Oligopaint synthesis.
species	TE domain	forward primers	reverse primers
D. elegans	TAHRE gag	ACCACCACTTCAAGTAGCCA	CATACCATGACACGGCCATC
D. elegans	TR2 gag	AACCAGCAACCTCTTACGGA	CATACCCGGTAGAGTCTCCG
D. elegans	TR2 RT	TTTTCGTCCCATCTCGCCTA	GGTTGGTGGTTTAAGGGCAG
D. ficusphila	TR2 gag	CCAAACAACCGTGCACTGAT	AGAGAGCCGGAAAGCAATCT
D. ficusphila	TR2 RT	AGCCCATCTCCCTTTTCGAA	ATAAGTTCCCTCGCCTCTGG
D. rhopaloa	TARTAHRE gag	CTGTAAGCAAGCGGATTCCC	CTCCAGGAAAGACAGGCTGA
D. rhopaloa	TARTAHRE RT	CTCAGGCCTGTCACTCTTGT	CAAGACTTCTCGCCCAACAG
D. rhopaloa	TR2 gag	TGCTGACCAAGTAAACCCCT	ACCCGACTACAAGCTGAACA
D. rhopaloa	TR2 RT	ACGTGCGGTTTAAGCCAATT	AAGAAAACAACGCCCGACAA
D. takahashii	TAHRE RT	AAATTGATGCCCTGGTCCC	ACATCTTTGCCGTCCAATCG
D. melenogaster	TAHRE gag	CTCCCGTTTTCAAGAGCAAG	GCTACAGATGCCAAGGCTTC
D. melenogaster	TART gag	GATGATGATCTGGGGGTCAC	CTGTCCACCCCCAATAACAC
D. melenogaster	TART RT	ACCAGGGAAAAGTGTGAACG	TGACAATGGACCATATCACGCA
species	Head-to tail junctions		forward primers	reverse primers
D. ananassae	TR2-RT	TR2-gag	TGCTGGGCTAAACTGGATCA	AAGCCAATGGACCTCTTCGA
D. elegans	TAHRE-gag	TR2-gag	ACACTAGTGCAGCCTAACCA	CAGAAAGCCATGGAAAGCCC
D. elegans	TR2-RT	TAHRE-gag	GTTGGGAGAGTTGGCAAGTG	TATCTGCTGGGTCAATGCCA
D. elegans	TR2-gag	TAHRE-gag	CGCTACTTGGGGCTCTTACT	GTAGCCGGAAACCATTGGAC
D. ficusphila	TR2-RT	TR2-gag	TCTCCACCTACACACCACAC	ATGTTTGAGGGTGAACTGGC
D. rhopaloa	TARTAHRE-RT	TR2-gag	GCAGATGGAGAGGGAGGATC	TCGCGCCAAAATCAAACTCA
D. rhopaloa	TR2-RT	TARTAHRE-gag	CCGCTATTACCGTCCGAGAT	CCAATCAAGCCAGCAGTCAA
D. rhopaloa	TR2-RT	TR2-gag	CCGCTATTACCGTCCGAGAT	TCGCGCCAAAATCAAACTCA
D. melanogaster	TAHRE-gag(HeT-A)	TAHRE-gag(HeT-A)	ACTAACTCACCACGCCCAAC	GTTTTCAAGAGCAAGGCAGC
D. melanogaster	TART-RT	TAHRE-gag(HeT-A)	CTGGCTTTGGATTCCTCGTA	TTTTTGCGTGATATGGTCCA

## Sheet: qPCR_Primers
Table S10. Primers for PCR and RT-qPCR as well as FISH probe and Oligopaint synthesis.
species	gene	Forward primers	Reverse primers	amplicon_size
D. melanogaster	rp49	GGTTACGGATCGAACAAGCG	GATCTCGCCGCAGTAAACG	123
D. elegans	rp49	CCACCGGATTCAAGAAGTTCC	GATCTCCTTGCGCTTCTTGG	122
D. takahashii	rp49	CCACCGGATTCAAGAAGTTCC	GATCTCCTTGCGCTTCTTGG	122
D. melanogaster	HeT-A	TCCAGTGCTACAGATGCCAG	GGGTGGATCTTGGTTTGGTG	120
D. melanogaster	TART RT	GTCCTCAGCTCAGACACACT	ACATGTCCGGTTTTAGCAGC	122
D. elegans	TAHRE gag	CCAGCCTGACGGAGATCATA	CGGAAGCCTTGGCAATTGTA	123
D. takahashii	TAHRE RT	GGTTTCAGGAAGGAGCATGG	GGTCAAAAGCCTCCGTGATG	124

## Sheet: PCR_DIG_DNA_FISH_Probe_Primers
Table S10. Primers for PCR and RT-qPCR as well as FISH probe and Oligopaint synthesis.
species	TE	Forward_primer	Reverse_primer
D. melanogaster	HeT-A	GGCGAACGAGTTCTGGAATA	AAATTCTGTTCCGCATCCAC
D. melanogaster	TART-gag	GATGATGATCTGGGGGTCAC	GTGTTATTGGGGGTGGACAG
D. melanogaster	TART-RT	ACCAGGGAAAAGTGTGAACG	TGCGTGATATGGTCCATTGT
D. rhopaloa	TARTAHRE-RT	TAGCTACCTCACAAACCGCA	CGCCCATTCTGTGATTTCGT
D. biarmipes	HTR0	ATGGACCTGACAAACGTGAA	GTCACCGCAAGAGACACAGA
D. biarmipes	Helitron-N2	CGATCTAGCCATGTCCGTCT	TTCCGATCGTTCCTATGACA
D. biarmipes	SAR	TTTCGCCAAATCATGACGTA	ATGCGAAAATGGGTCAAAAA
D. biarmipes	SAR2	GCAGCCAATAACCCAAGCTA	GCCAGAAATTGTCCAAATGAA

## Sheet: Oligopaint_Probes
Table S10. Primers for PCR and RT-qPCR as well as FISH probe and Oligopaint synthesis.
Oligos_names	Oligo_sequences
D. elegans TR2-RT_1	TAGCGCAGGAGGTCCACGACGTGCAAGGGTGGGGAGCCAAAATGGAGTTGACGCTCCTTTTCGTCCCATCTGTGTATCCCGCCGGATCTG
D. elegans TR2-RT_2	TAGCGCAGGAGGTCCACGACGTGCAAGGGTTCTCAGATACGGCCATTTCCCAGAGCAATGGAAATGCGCATGTGTATCCCGCCGGATCTG
D. elegans TR2-RT_3	TAGCGCAGGAGGTCCACGACGTGCAAGGGTTCGGATTCCGTAAGGAACACAACACAGAGCAGCAACTGCGTGTGTATCCCGCCGGATCTG
D. elegans TR2-RT_4	TAGCGCAGGAGGTCCACGACGTGCAAGGGTTTGACGTTAGCGAGGCTTTTGATCGGGTCTGGCATGATGGTGTGTATCCCGCCGGATCTG
D. elegans TR2-RT_5	TAGCGCAGGAGGTCCACGACGTGCAAGGGTAGAAAGGGGAAGATAGGCGCTGGAGTACCACAAGGAAGCGTGTGTATCCCGCCGGATCTG
D. elegans TR2-RT_6	TAGCGCAGGAGGTCCACGACGTGCAAGGGTTCACCTCTGACATGCCTCTACCTACGATTGCTGGACAGCATGTGTATCCCGCCGGATCTG
D. elegans TR2-RT_7	TAGCGCAGGAGGTCCACGACGTGCAAGGGTAGGCGCTCTACAACAAGTTTACTCGGACCAAAATCGCCCTTGTGTATCCCGCCGGATCTG
D. elegans TR2-RT_8	TAGCGCAGGAGGTCCACGACGTGCAAGGGTAATTGCTCCGGTTTGGCAATACGCCCTTCCTATTTGGGGCTGTGTATCCCGCCGGATCTG
D. elegans TR2-RT_9	TAGCGCAGGAGGTCCACGACGTGCAAGGGTGCCATCCTAACCCTGAGGCAATACAGCTGGTTACTCAGCCTGTGTATCCCGCCGGATCTG
D. elegans TR2-RT_10	TAGCGCAGGAGGTCCACGACGTGCAAGGGTGGGGAGACCACCCTGTTGCTGACGTGCGGTTTAAGCCAATTGTGTATCCCGCCGGATCTG
D. elegans TR2-RT_11	TAGCGCAGGAGGTCCACGACGTGCAAGGGTTGAGGTTGACTCGTATAGGCCAATCAGCCTCTTGGCTGGCTGTGTATCCCGCCGGATCTG
D. elegans TR2-RT_12	TAGCGCAGGAGGTCCACGACGTGCAAGGGTGGATGTTCAGGTGTAAGGACTTTGAGGATGCAGTCCCCGCTGTGTATCCCGCCGGATCTG
D. elegans TR2-RT_13	TAGCGCAGGAGGTCCACGACGTGCAAGGGTGTTAGTGAAGCGTTTGACCGTGTTTGGCACCAAGGTCTGCTGTGTATCCCGCCGGATCTG
D. elegans TR2-RT_14	TAGCGCAGGAGGTCCACGACGTGCAAGGGTCGGATACAACGGGCACCAATCCAGAATTGGAACCATTGCCTGTGTATCCCGCCGGATCTG
D. elegans TR2-RT_15	TAGCGCAGGAGGTCCACGACGTGCAAGGGTGCGGGTGTCCCTCAAGGCAGTGTCTTGGGACCCATATTATTGTGTATCCCGCCGGATCTG
D. elegans TR2-RT_16	TAGCGCAGGAGGTCCACGACGTGCAAGGGTATACAGCAGATATGCCGCTCCCAAGCTCCGTTGAACGAACTGTGTATCCCGCCGGATCTG
D. elegans TR2-RT_17	TAGCGCAGGAGGTCCACGACGTGCAAGGGTTACGAAATCACAGAATGGGCGTCAGACTGGGGCATTACCCTGTGTATCCCGCCGGATCTG
D. elegans TR2-RT_18	TAGCGCAGGAGGTCCACGACGTGCAAGGGTACACGTTATGTTTTCAAACCGCACCGTCTCGGTCTCACGATGTGTATCCCGCCGGATCTG
D. elegans TR2-RT_19	TAGCGCAGGAGGTCCACGACGTGCAAGGGTAACCACCATACCACCCAACTCGCTAACAGAGTACGTGCCTTGTGTATCCCGCCGGATCTG
D. elegans TR2-RT_20	TAGCGCAGGAGGTCCACGACGTGCAAGGGTTAAACTGGATACTGGGGAAGCAAAGTAAGCTCCCAGCCGCTGTGTATCCCGCCGGATCTG
D. elegans TR2-RT_21	TAGCGCAGGAGGTCCACGACGTGCAAGGGTATAAGCAGATGATTGCGCCAATCTGGCACTATGCCCTCCCTGTGTATCCCGCCGGATCTG
D. elegans TR2-RT_22	TAGCGCAGGAGGTCCACGACGTGCAAGGGTTTCCCAGAACAAAATCTTACGCTGGGTGGTGCAAGCTGGCTGTGTATCCCGCCGGATCTG
D. elegans TR2-RT_23	TAGCGCAGGAGGTCCACGACGTGCAAGGGTGGTAAAATCGGCACAGGAGGTACTTGACGACGCTAGTGGCTGTGTATCCCGCCGGATCTG
D. elegans TR2-RT_24	TAGCGCAGGAGGTCCACGACGTGCAAGGGTAGGCTCGCCAACTCCCTCTATGCACACCCGAATGCAGAAGTGTGTATCCCGCCGGATCTG
D. elegans TR2-RT_25	TAGCGCAGGAGGTCCACGACGTGCAAGGGTACAGCAAACAACTTGAGACGCATTTCGCACCTTTGCGACATGTGTATCCCGCCGGATCTG
D. elegans TR2-RT_26	TAGCGCAGGAGGTCCACGACGTGCAAGGGTACTTCTGCTCCAGCAGCCGGAACAACACCAGCAGGTAGTGTGTGTATCCCGCCGGATCTG
D. elegans TR2-RT_27	TAGCGCAGGAGGTCCACGACGTGCAAGGGTAATACAGTCTGCAGCAGGATCAGTTGCGAGTTGAGCAGCATGTGTATCCCGCCGGATCTG
